# Supplementary material
Source: ML conference proceedings conference paper supplement (https://openreview.net/forum?id=Of2RhzJ8UJ)

arrhythmia [LIME] w, prototype:2

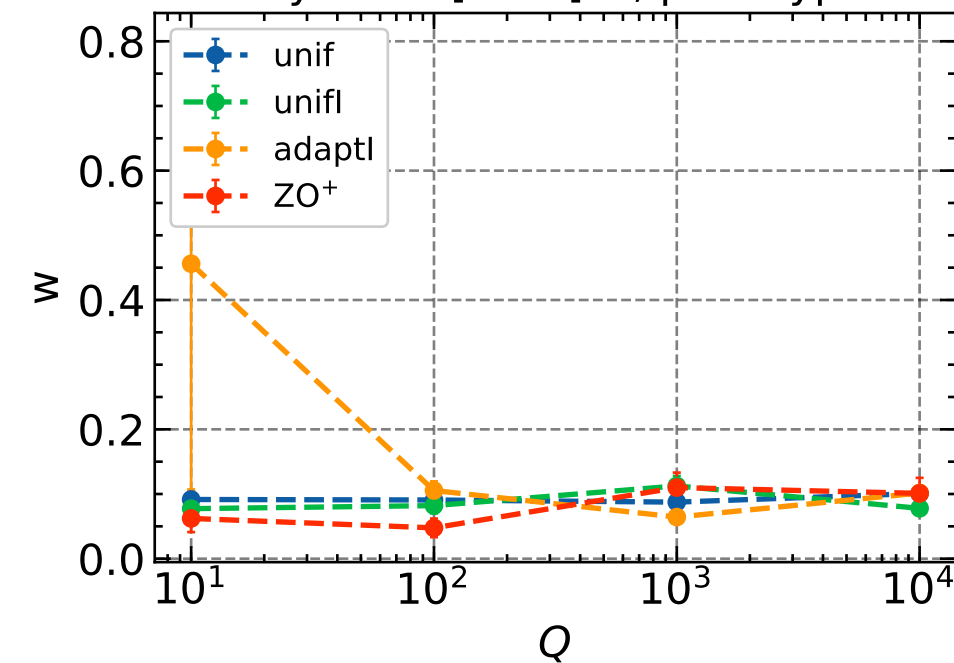

arrhythmia [LIME] timing, prototype:2

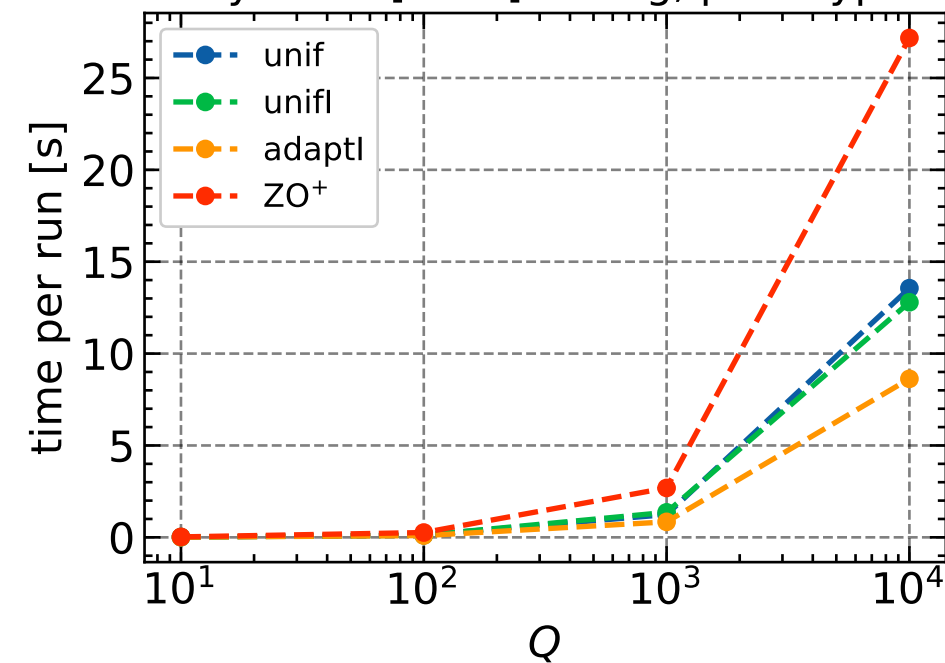

arrhythmia [SHAP] w, prototype:2

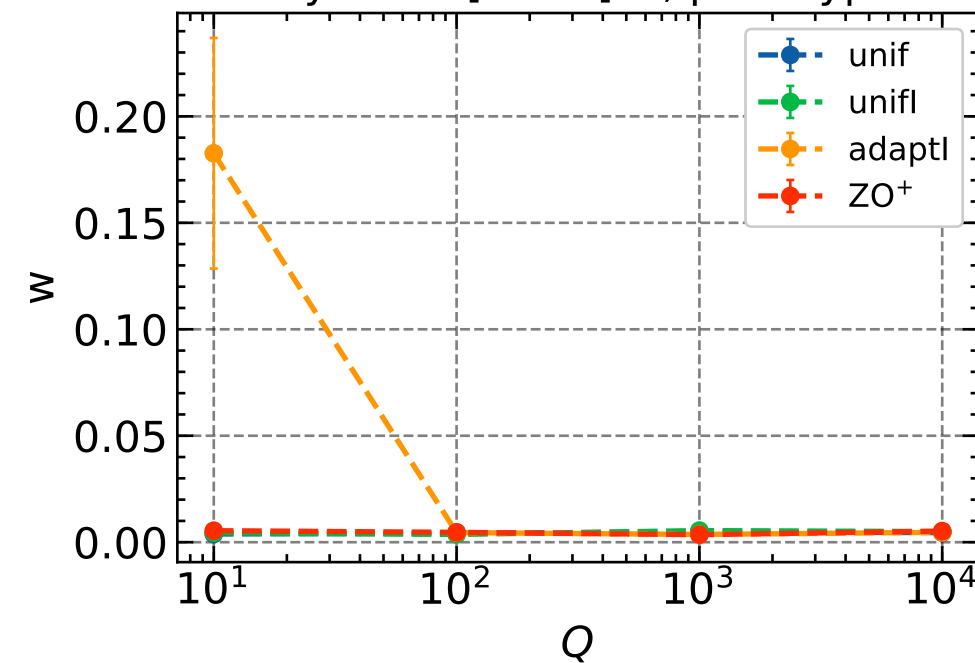

arrhythmia [SHAP] timing, prototype:2

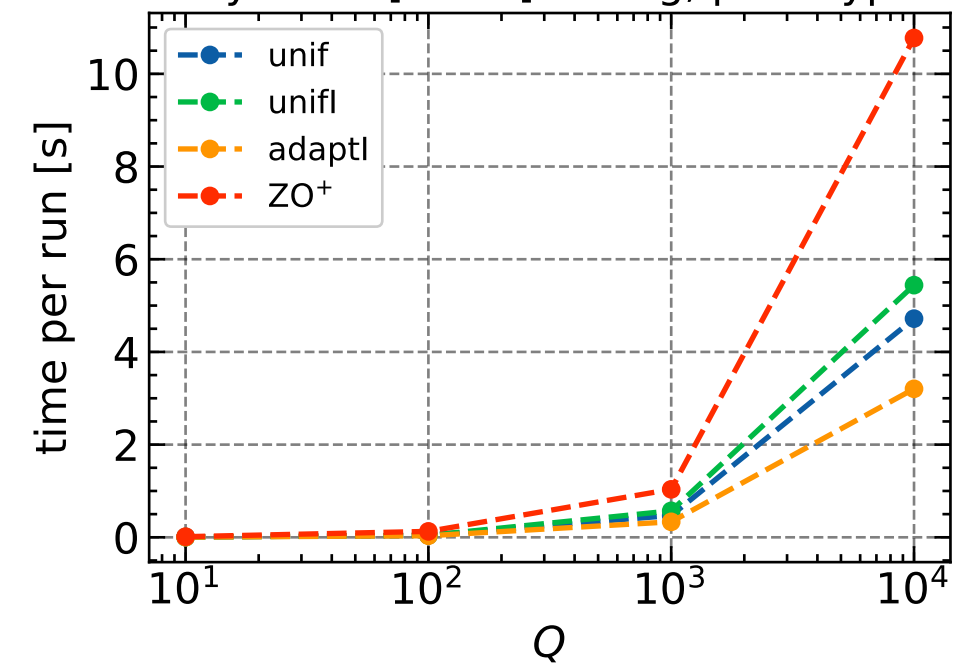

arrhythmia [LIME] w, prototype:3

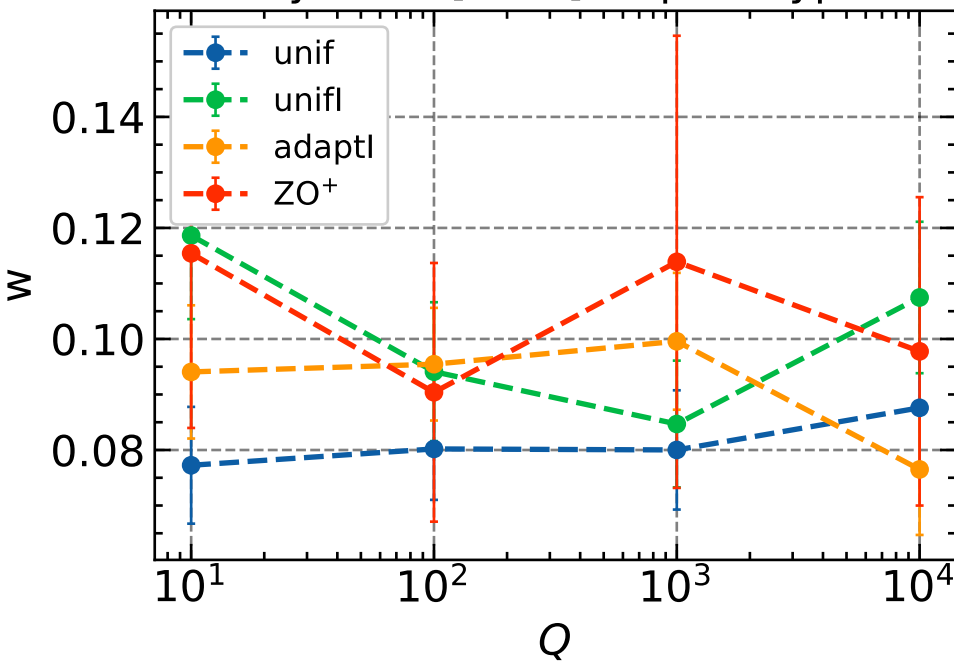

arrhythmia [LIME] timing, prototype:3

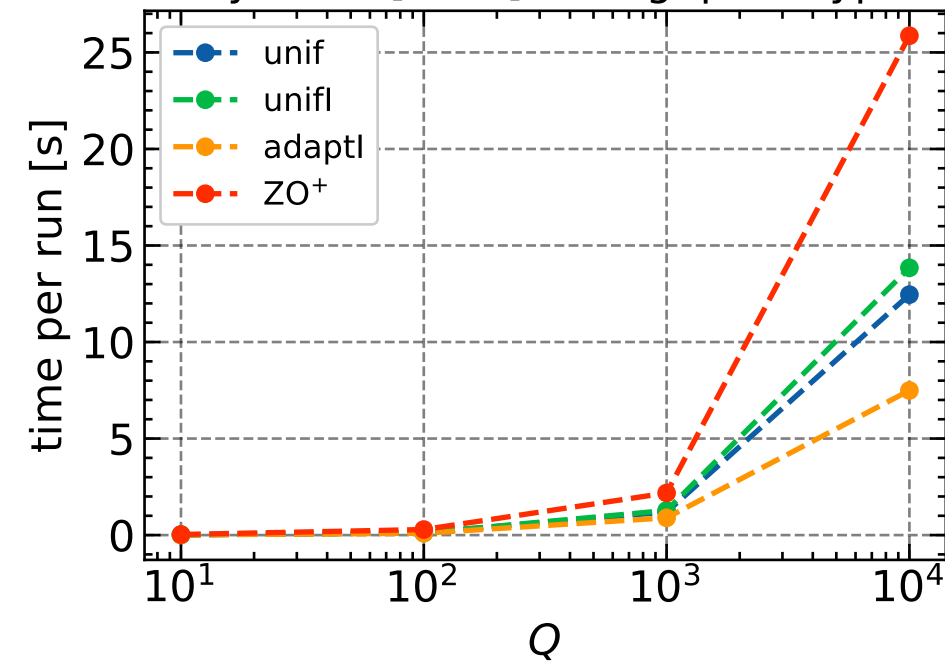

arrhythmia [SHAP] w, prototype:3

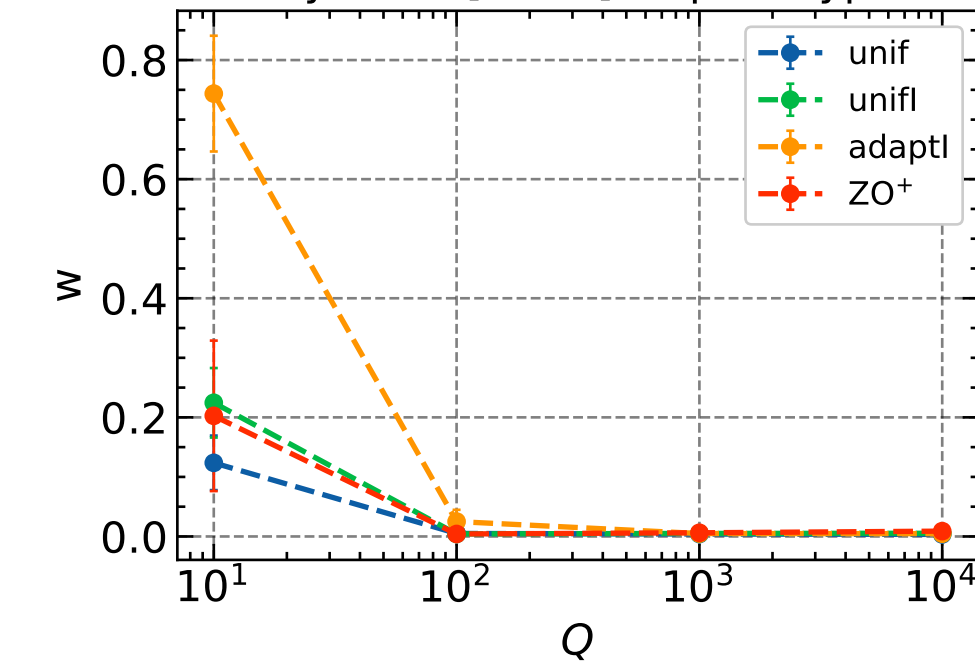

arrhythmia [SHAP] timing, prototype:3

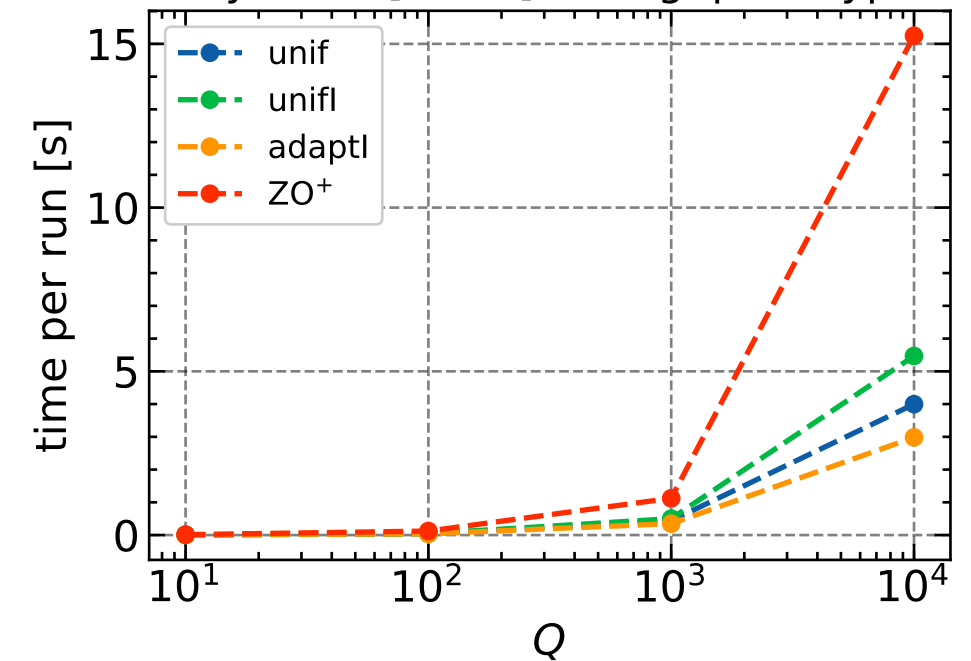

arrhythmia [LIME] w, prototype:4

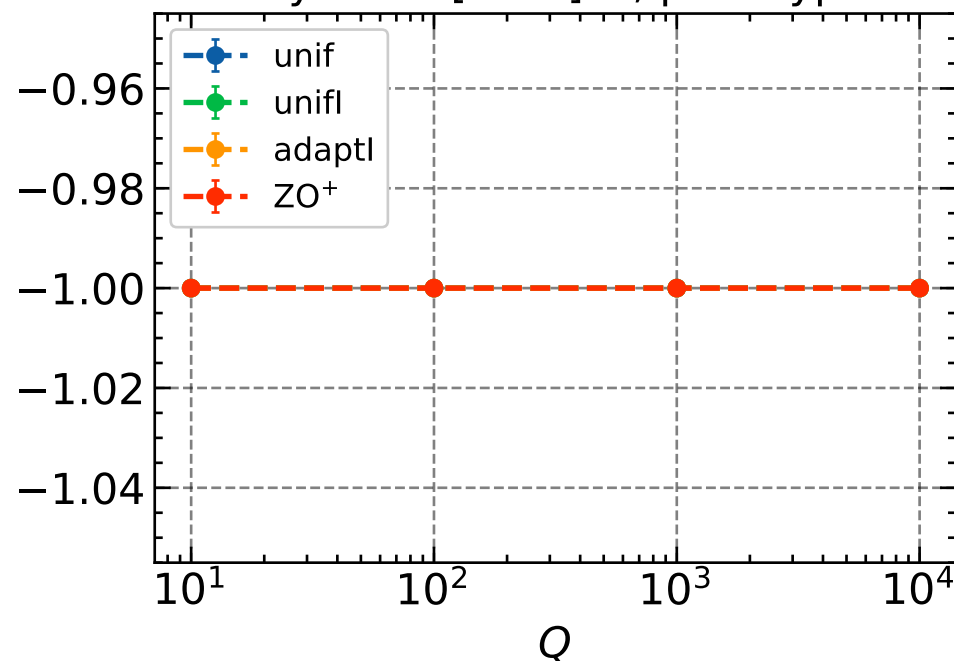

arrhythmia [LIME] timing, prototype:4

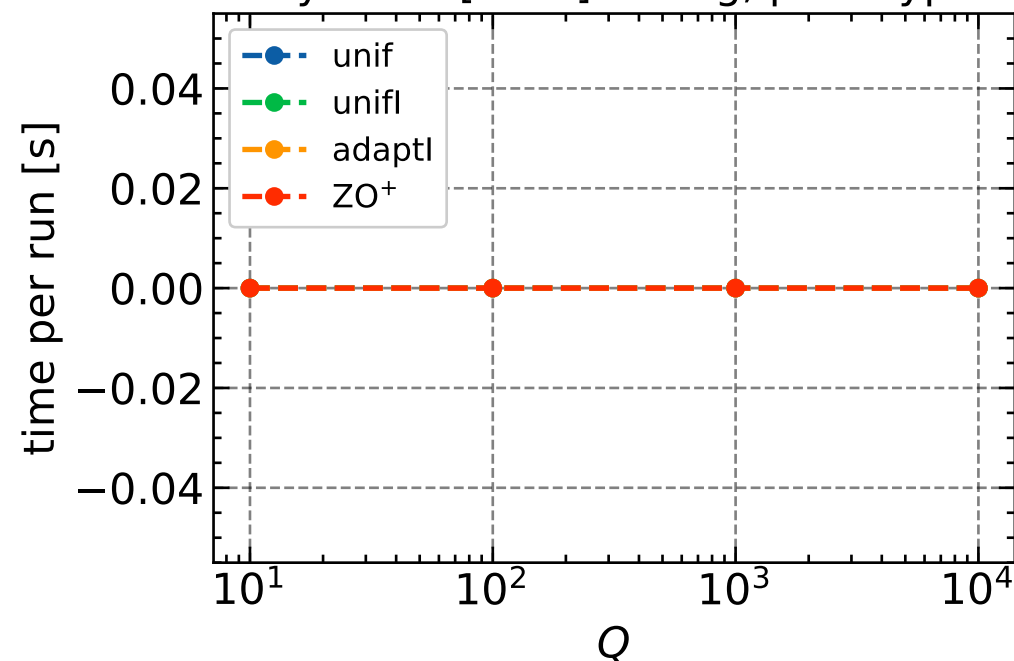

arrhythmia [SHAP] w, prototype:4

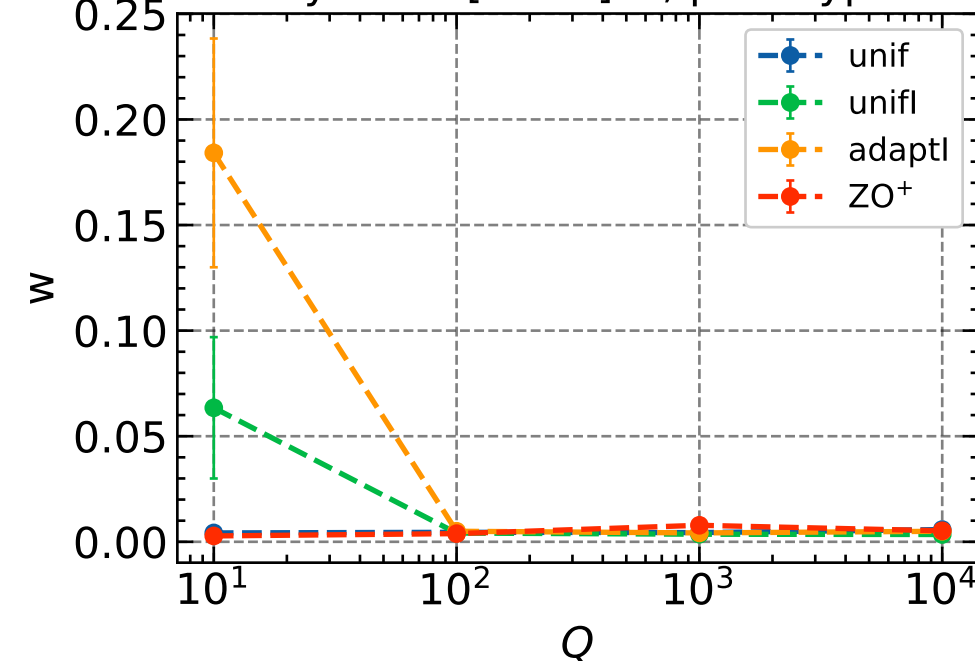

arrhythmia [SHAP] timing, prototype:4

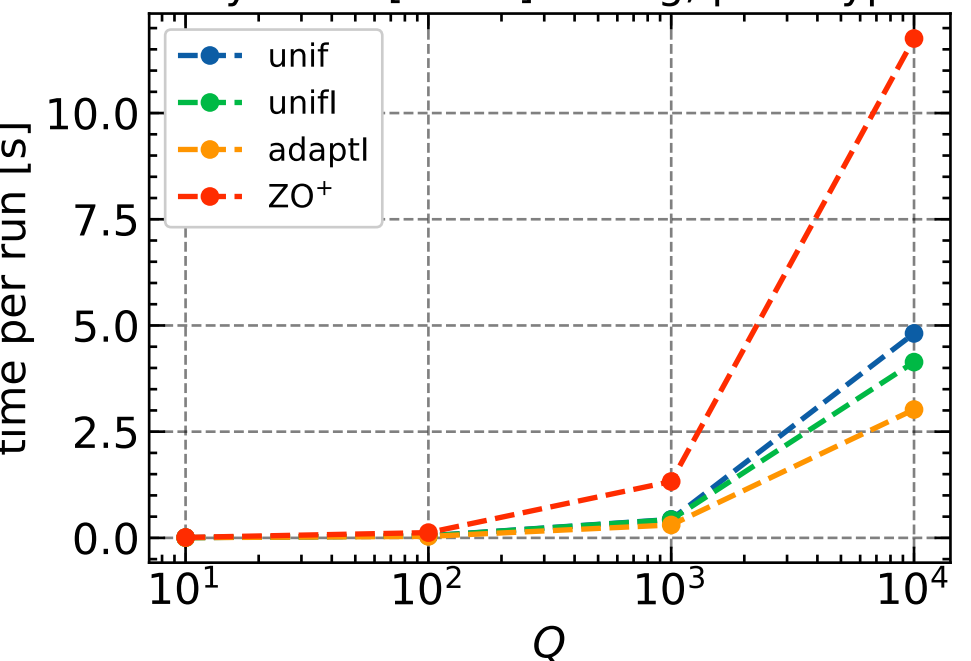

arrhythmia [LIME] w, prototype:5

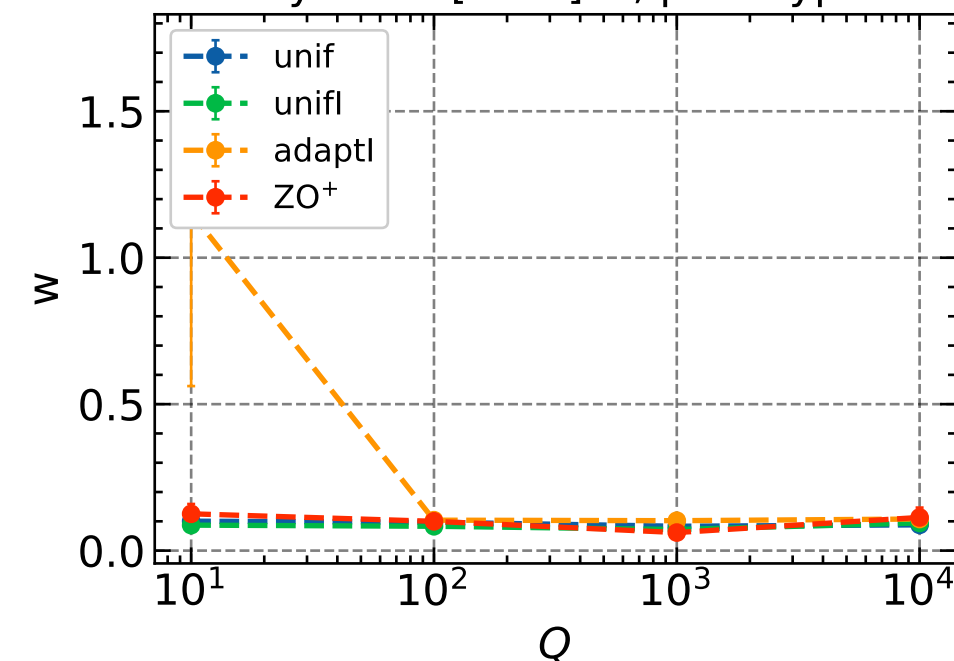

arrhythmia [LIME] timing, prototype:5

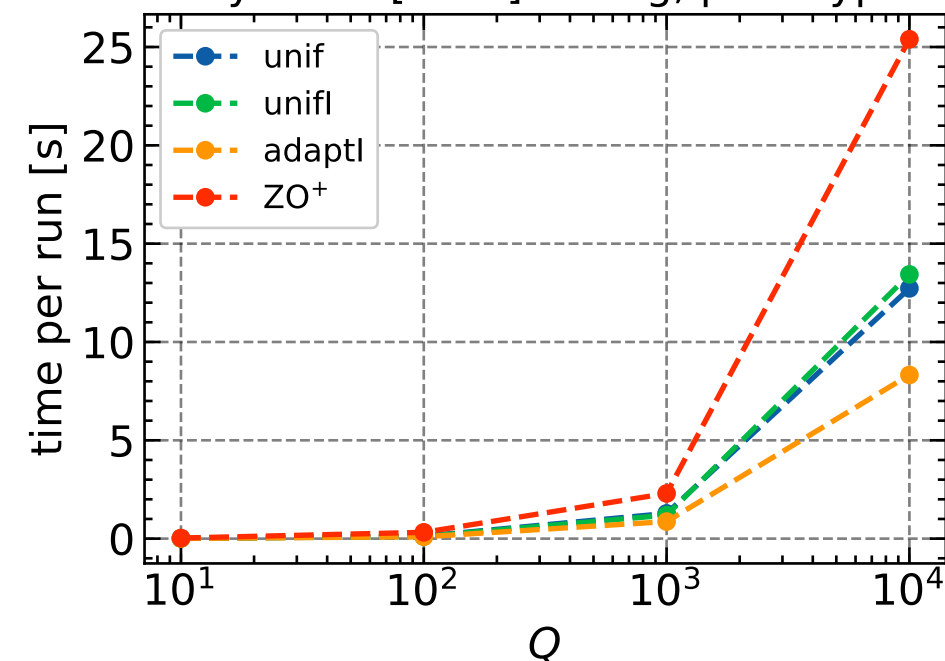

arrhythmia [SHAP] w, prototype:5

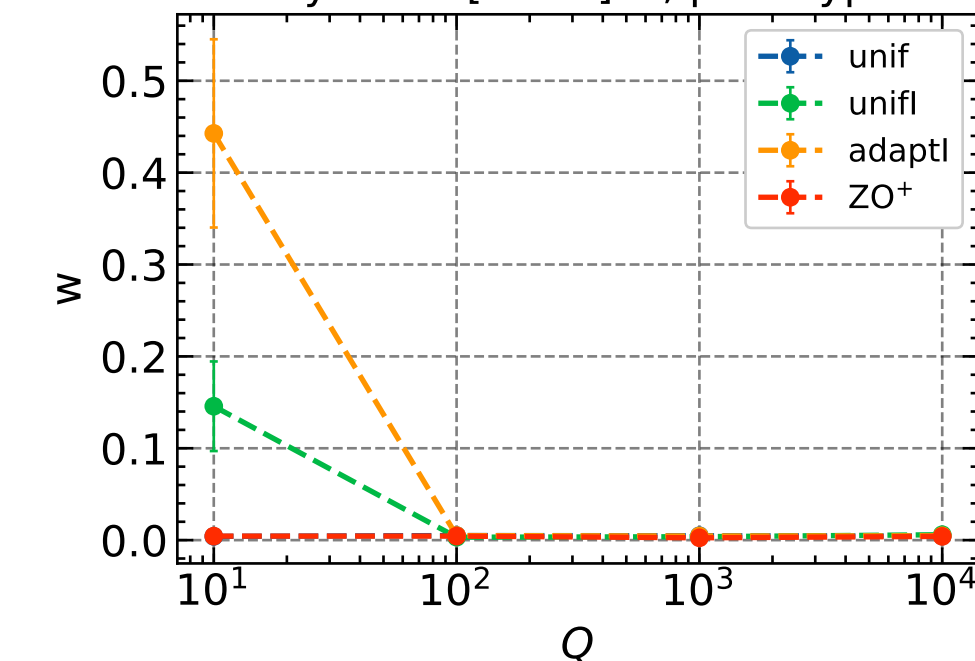

arrhythmia [SHAP] timing, prototype:5

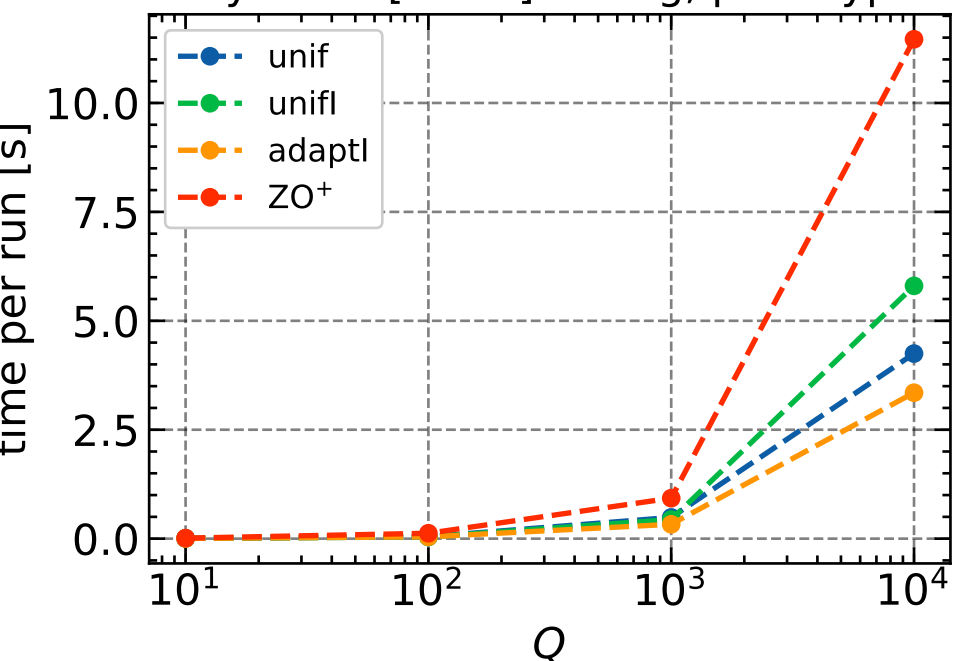

Supplement: supplementary_material [file attachment]
