# Supplementary material
Source: ML conference proceedings conference paper supplement (https://openreview.net/forum?id=Of2RhzJ8UJ)

heloc [LIME] w, prototype:2

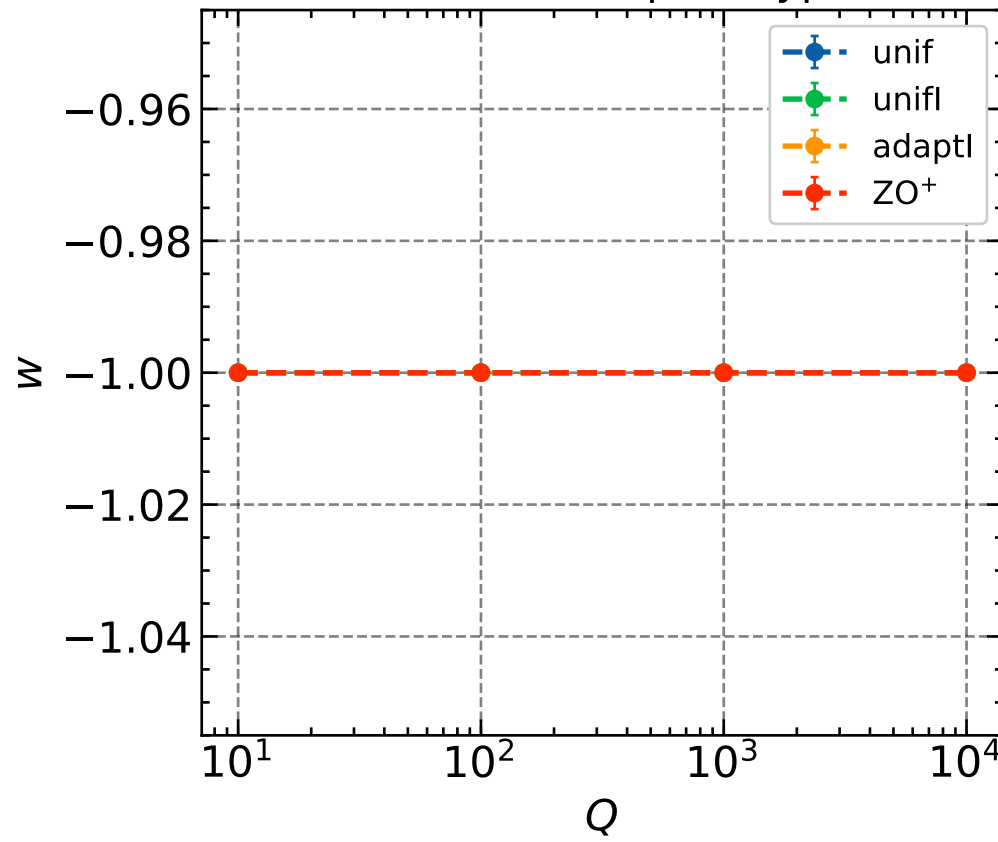

heloc [LIME] timing, prototype:2

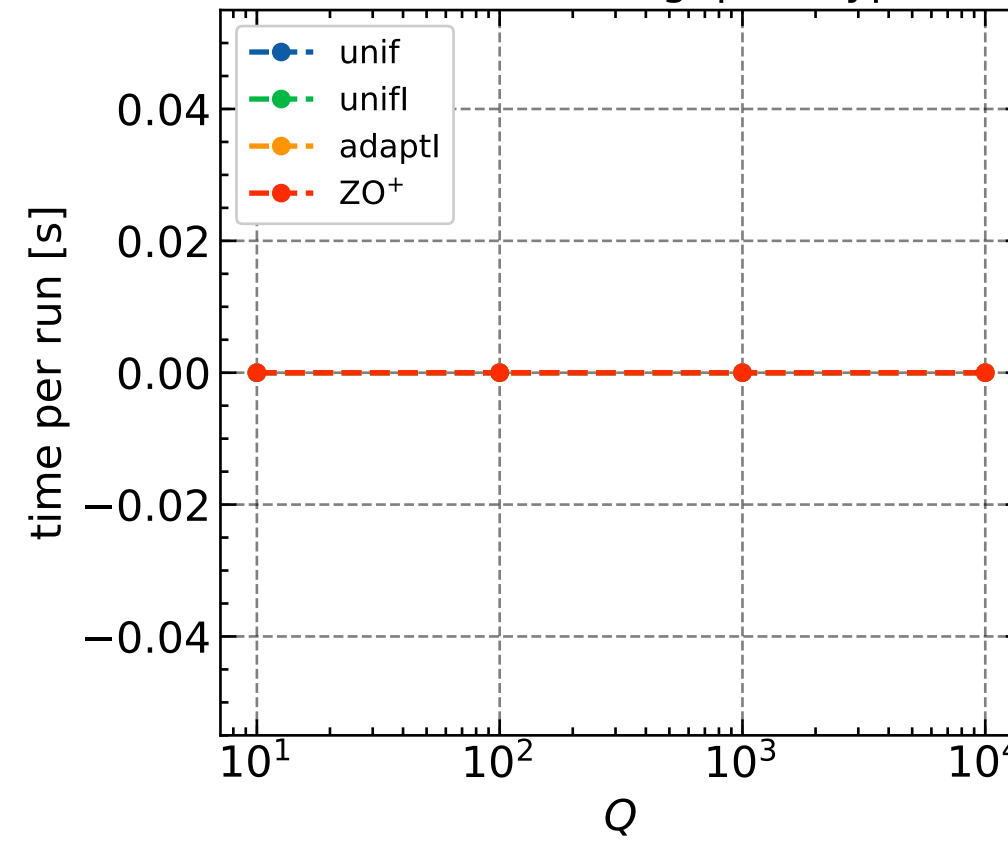

heloc [SHAP] w, prototype:2

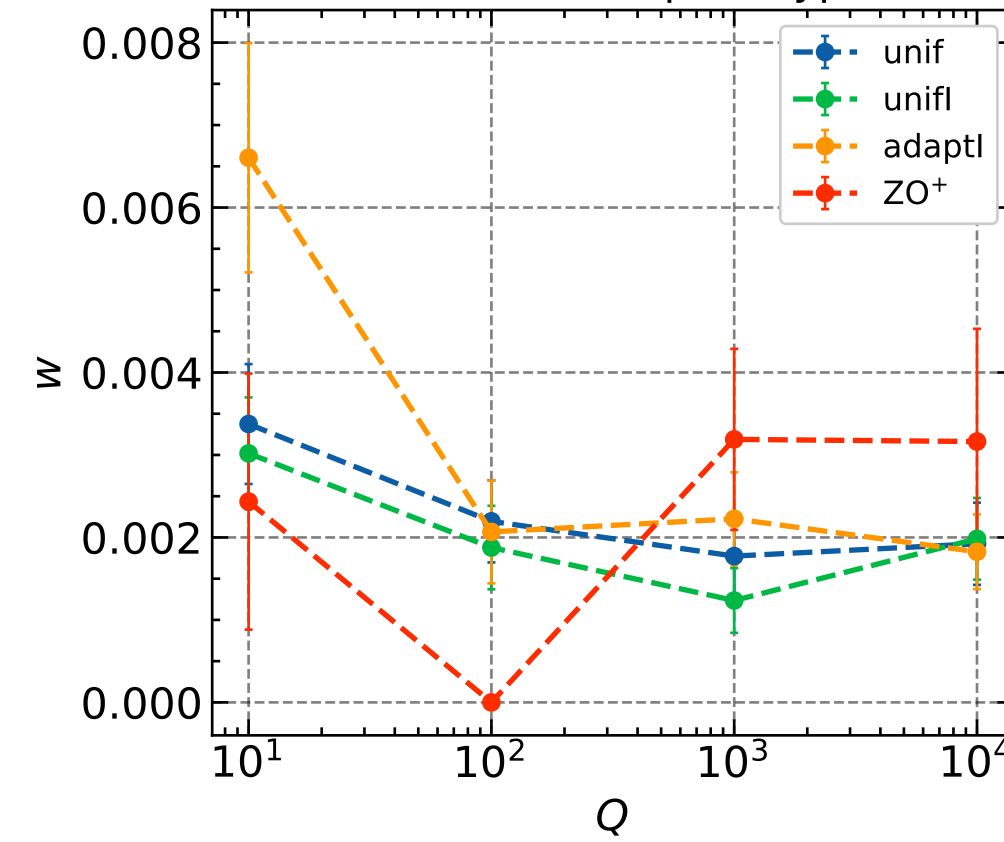

heloc [SHAP] timing, prototype:2

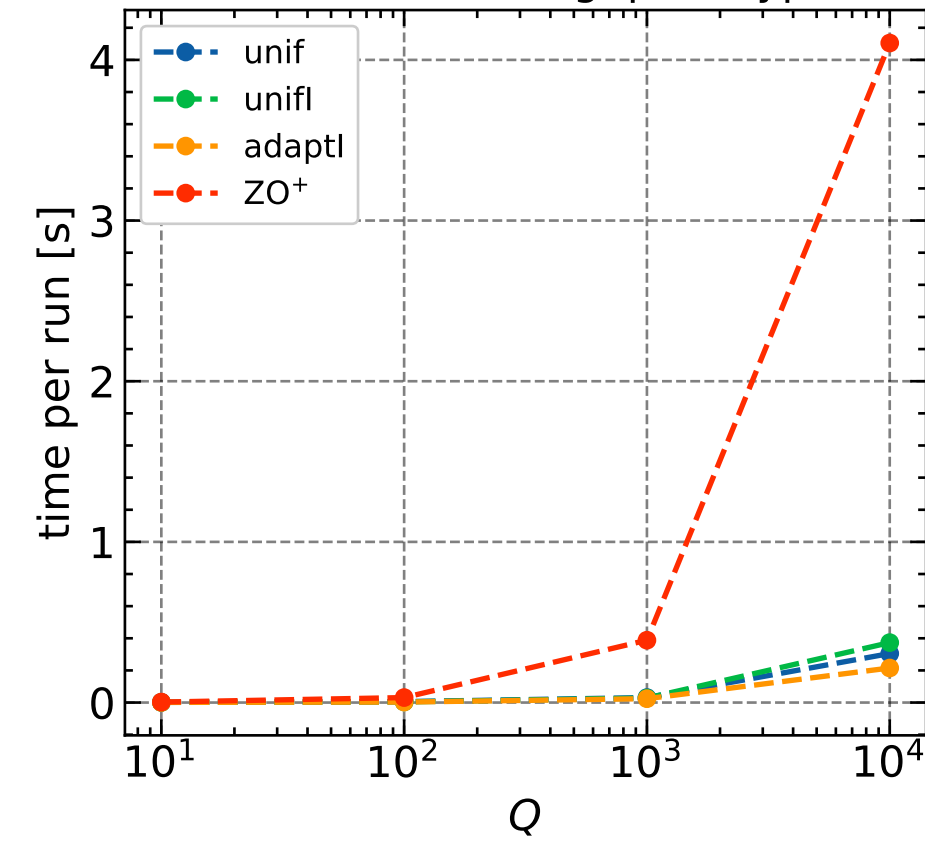

Supplement: supplementary_material [file attachment]
