# Supplementary material
Source: ML conference proceedings conference paper supplement (https://openreview.net/forum?id=Of2RhzJ8UJ)

fico [LIME] w prototype:1

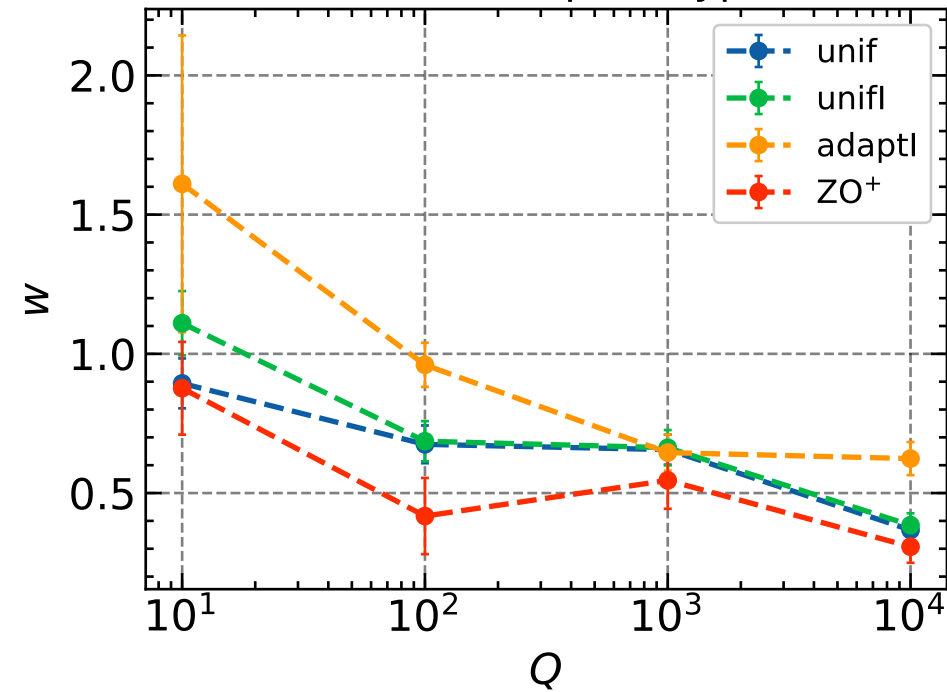

fico [LIME] timing

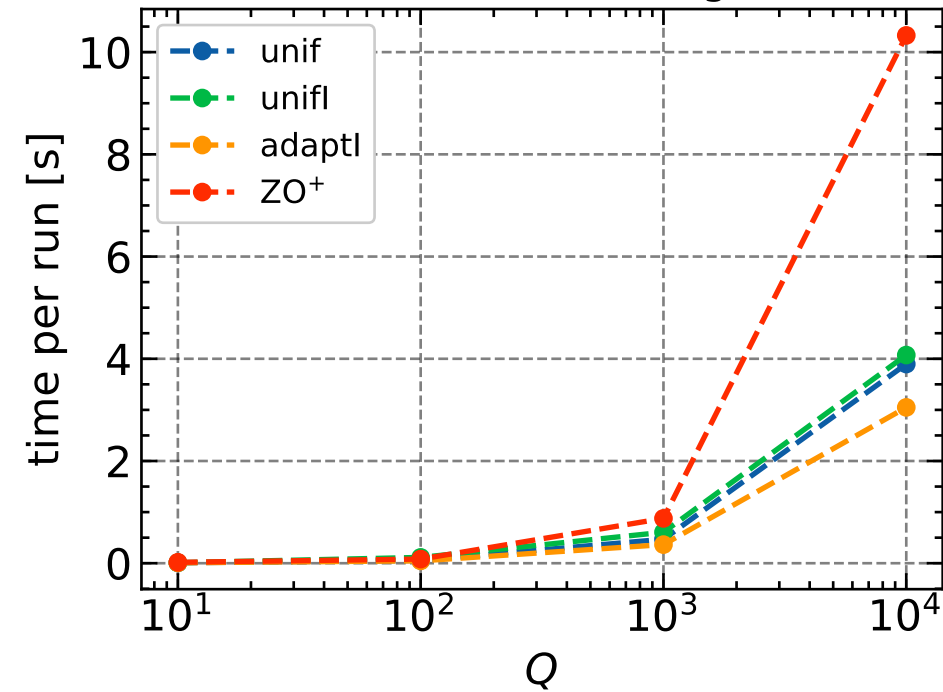

fico [SHAP] w prototype:1

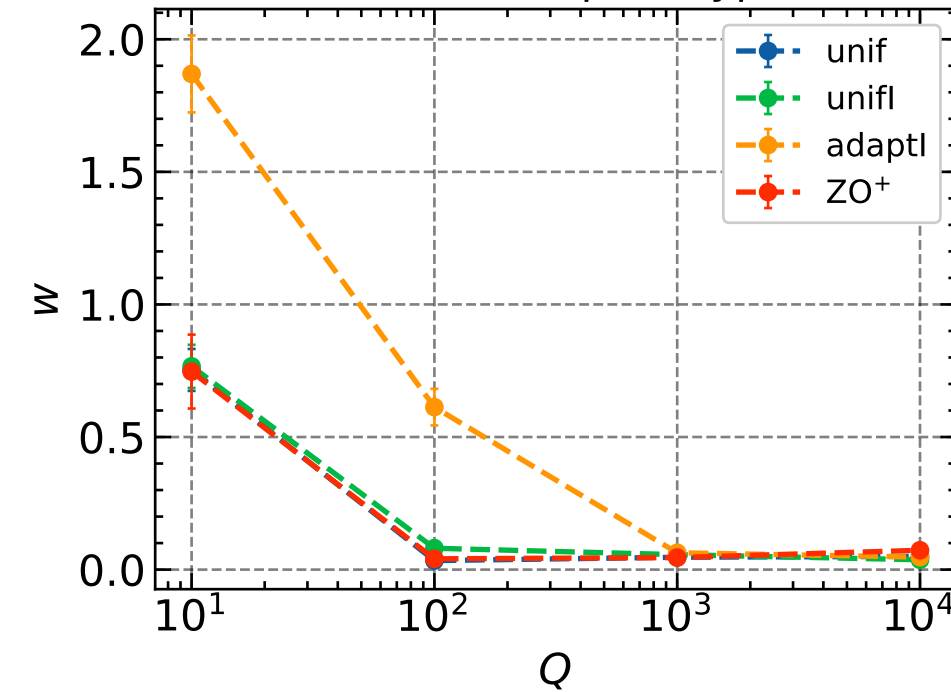

fico [SHAP] timing

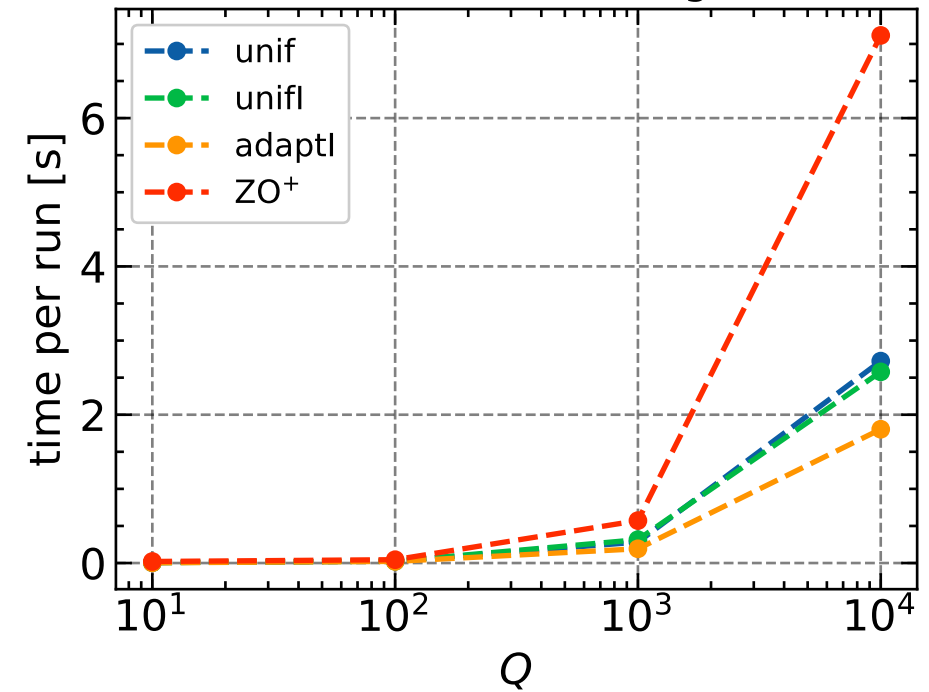

fico [LIME] w prototype:2

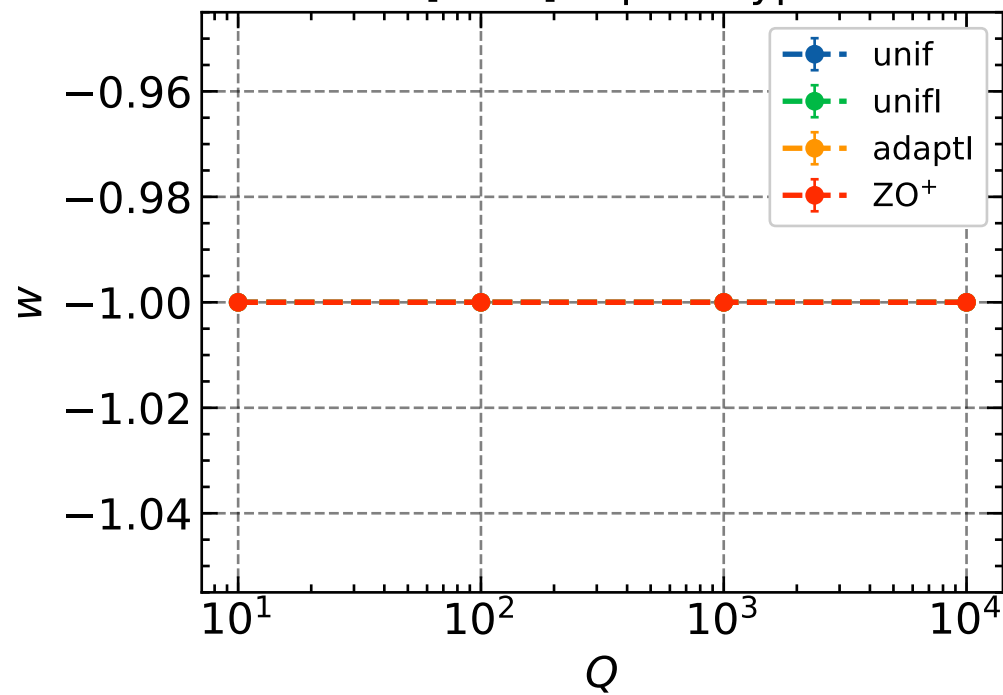

fico [LIME] timing

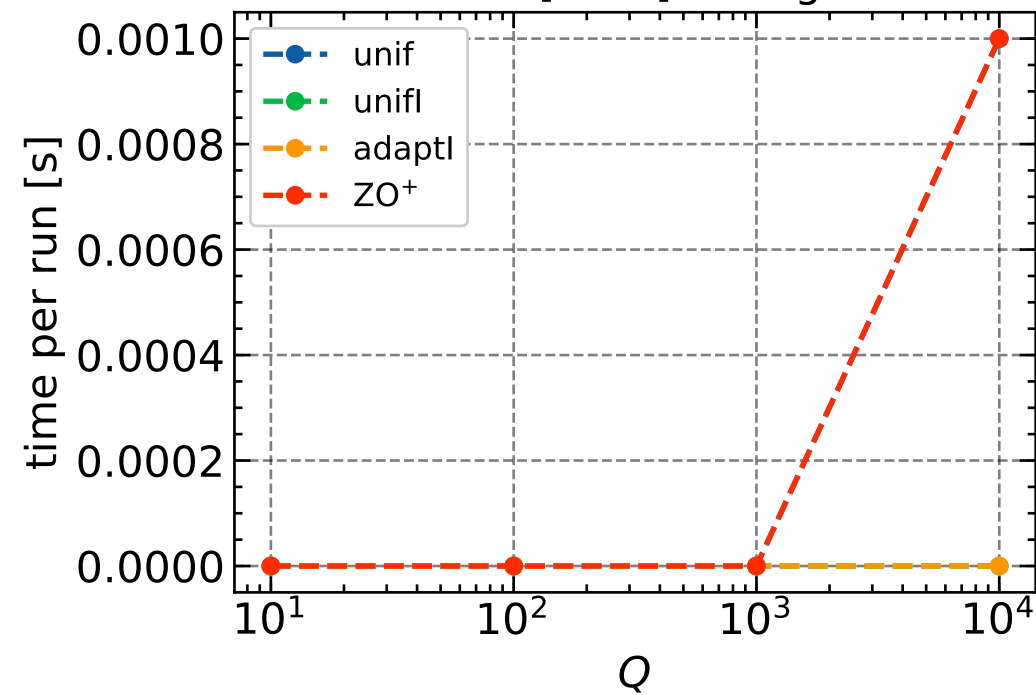

fico [SHAP] w prototype:2

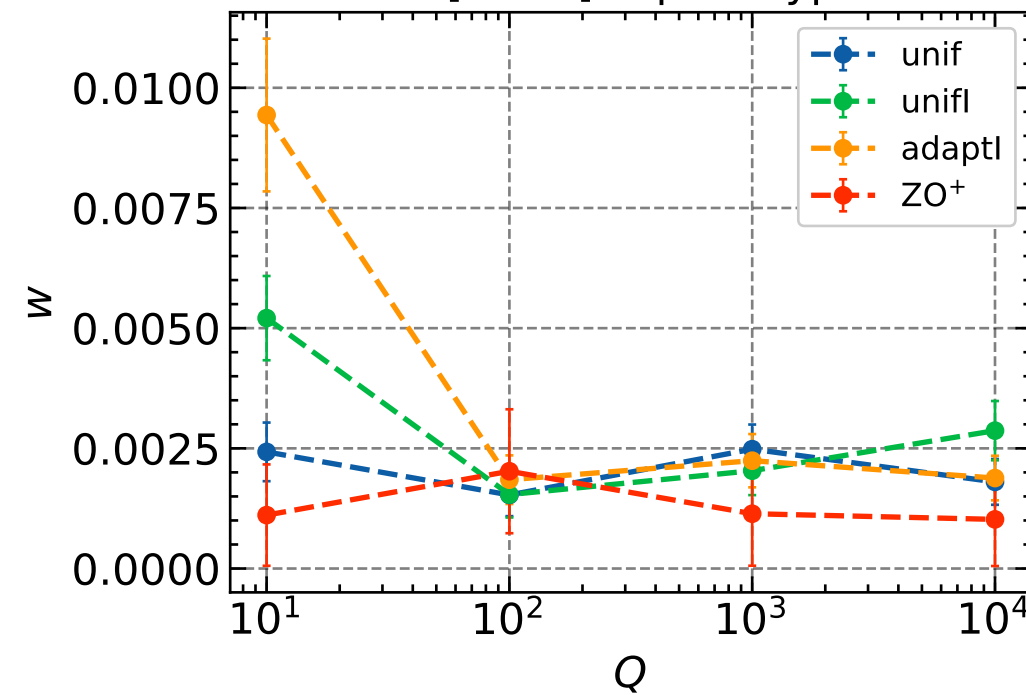

fico [SHAP] timing

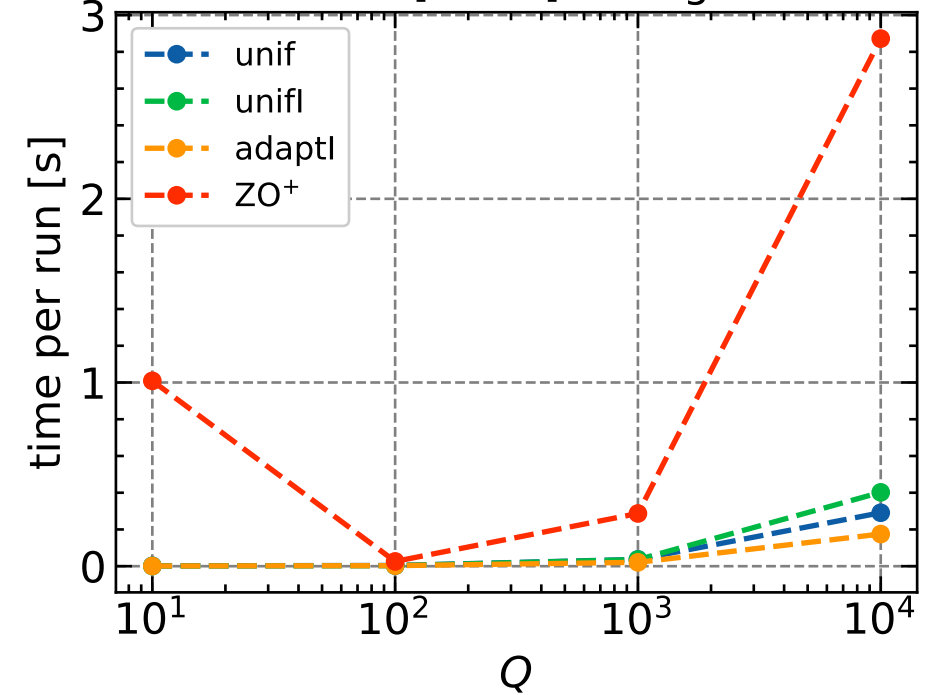

Supplement: supplementary_material [file attachment]
