# Supplementary material
Source: ML conference proceedings conference paper supplement (https://openreview.net/forum?id=Of2RhzJ8UJ)

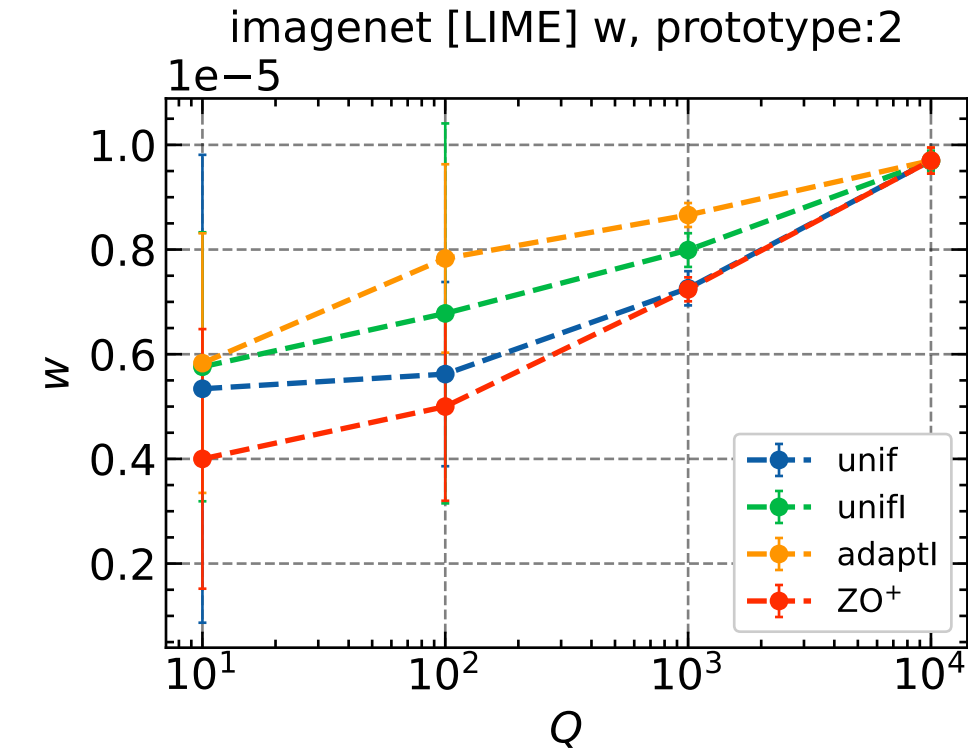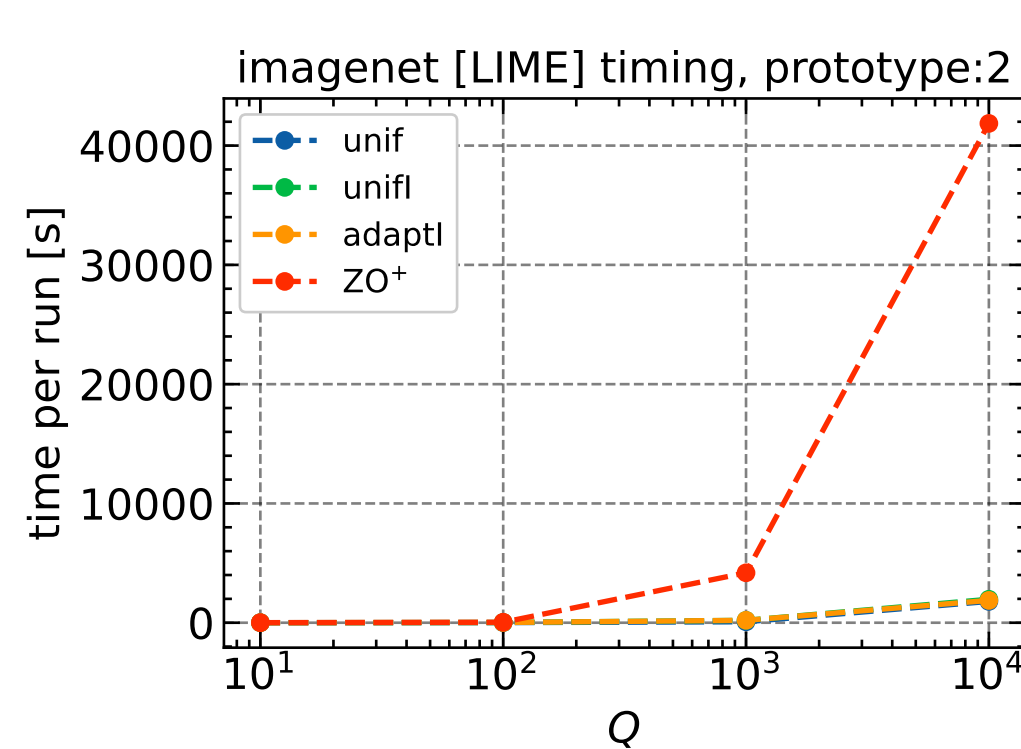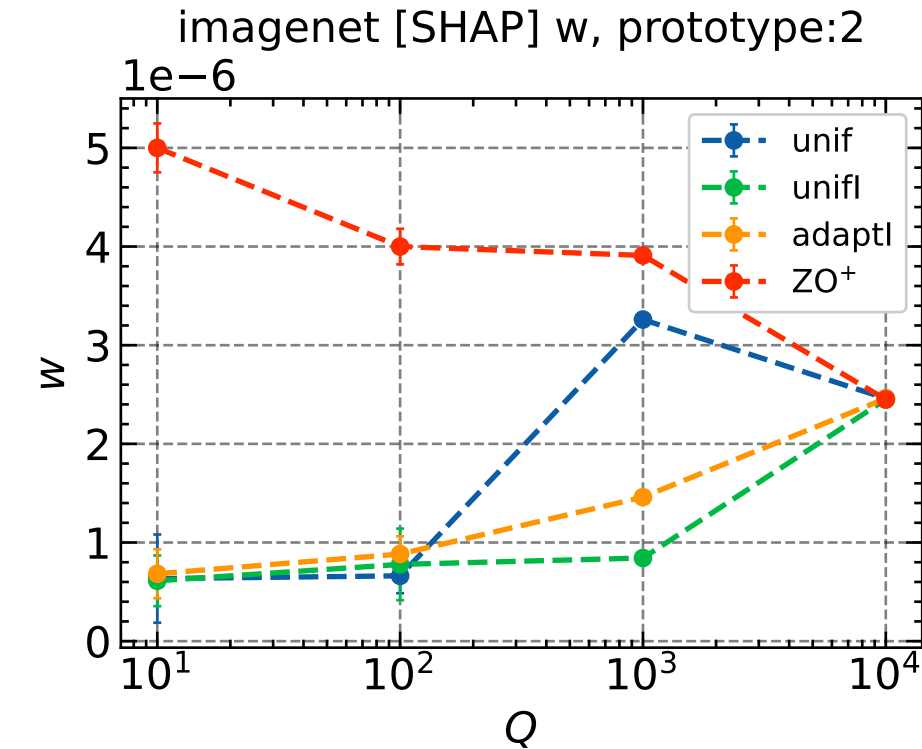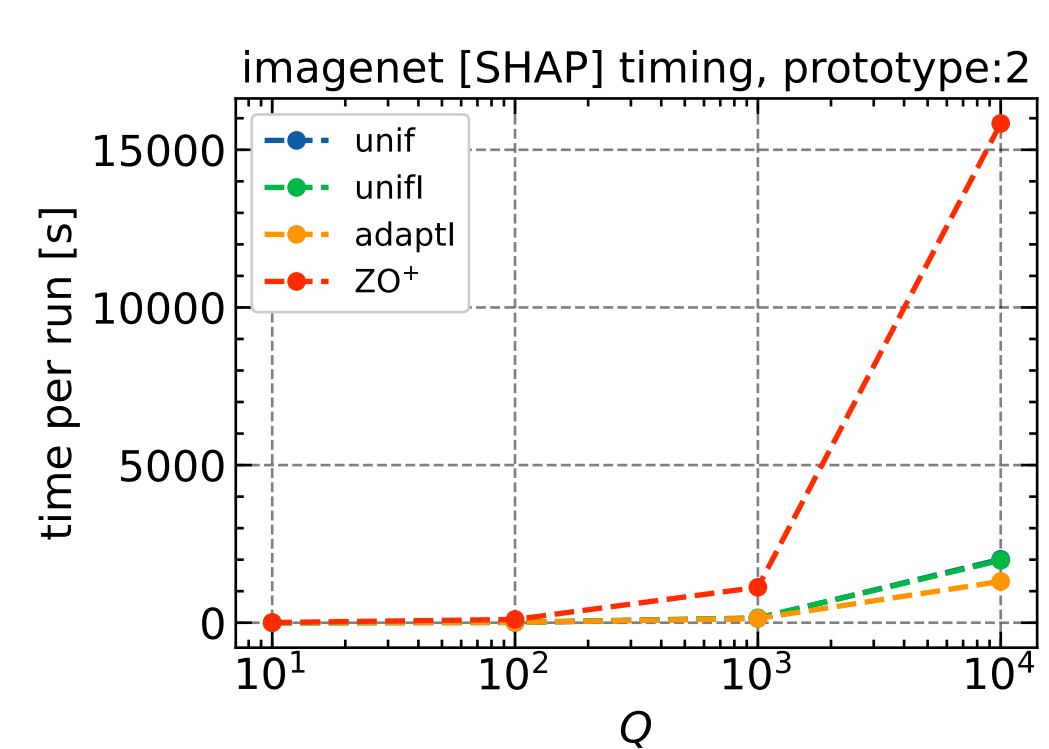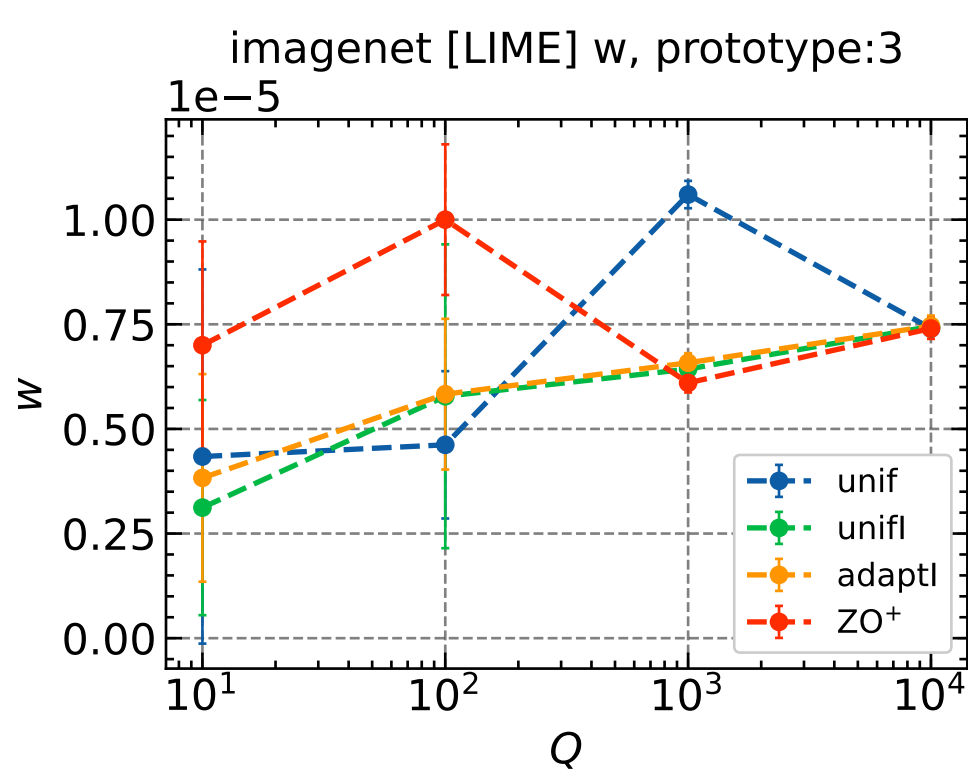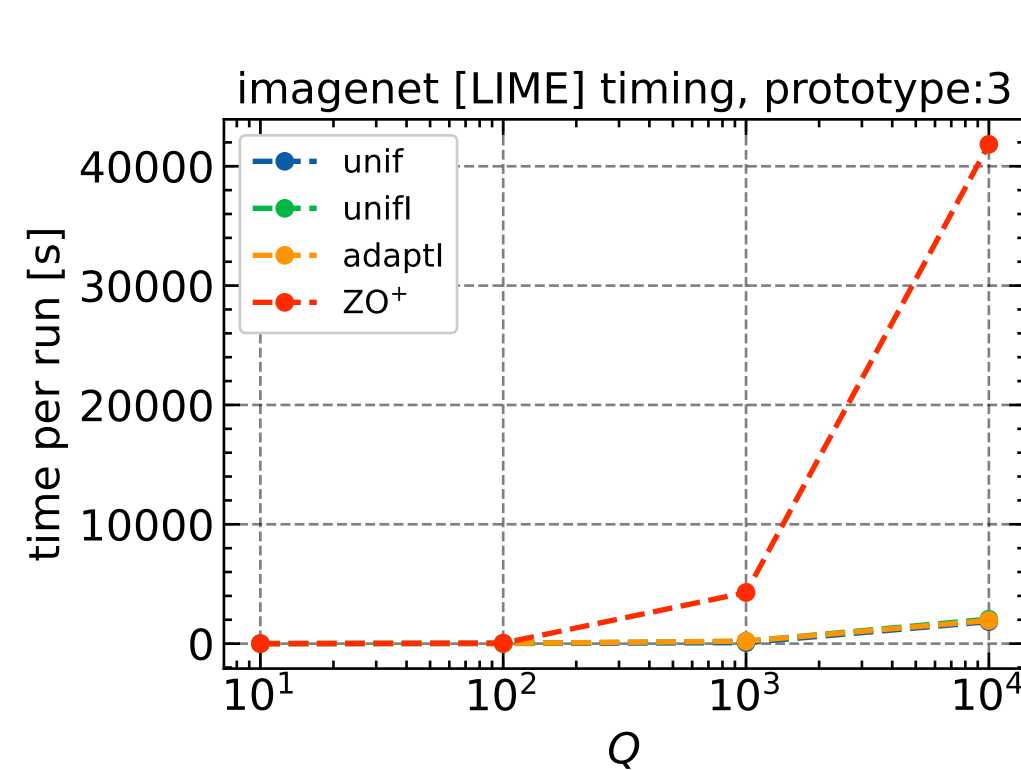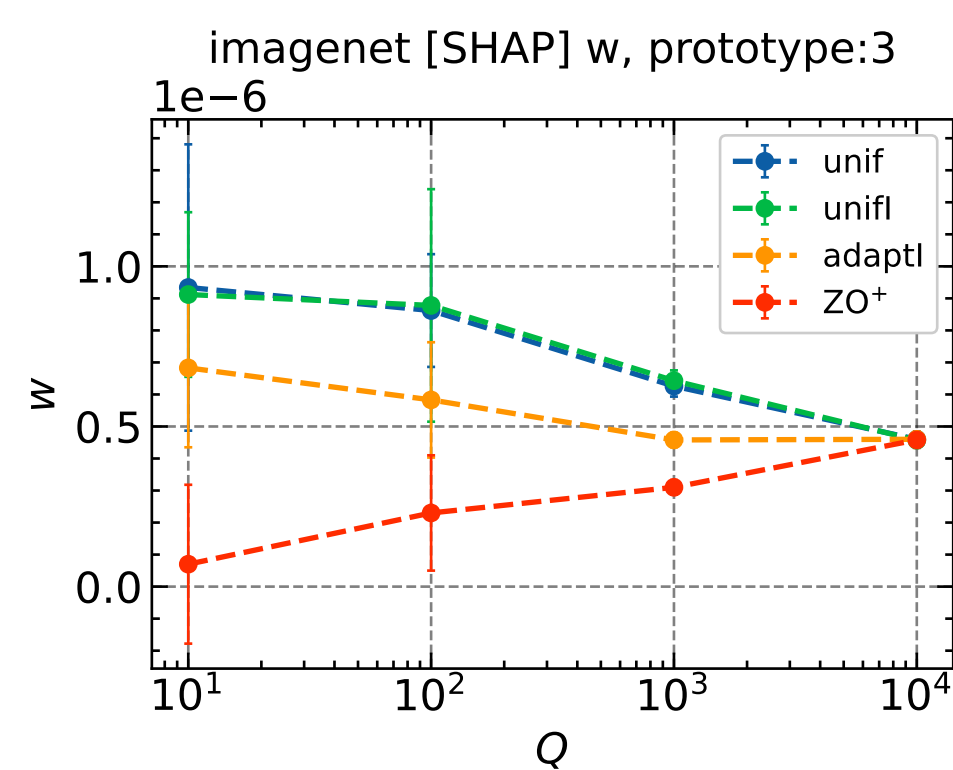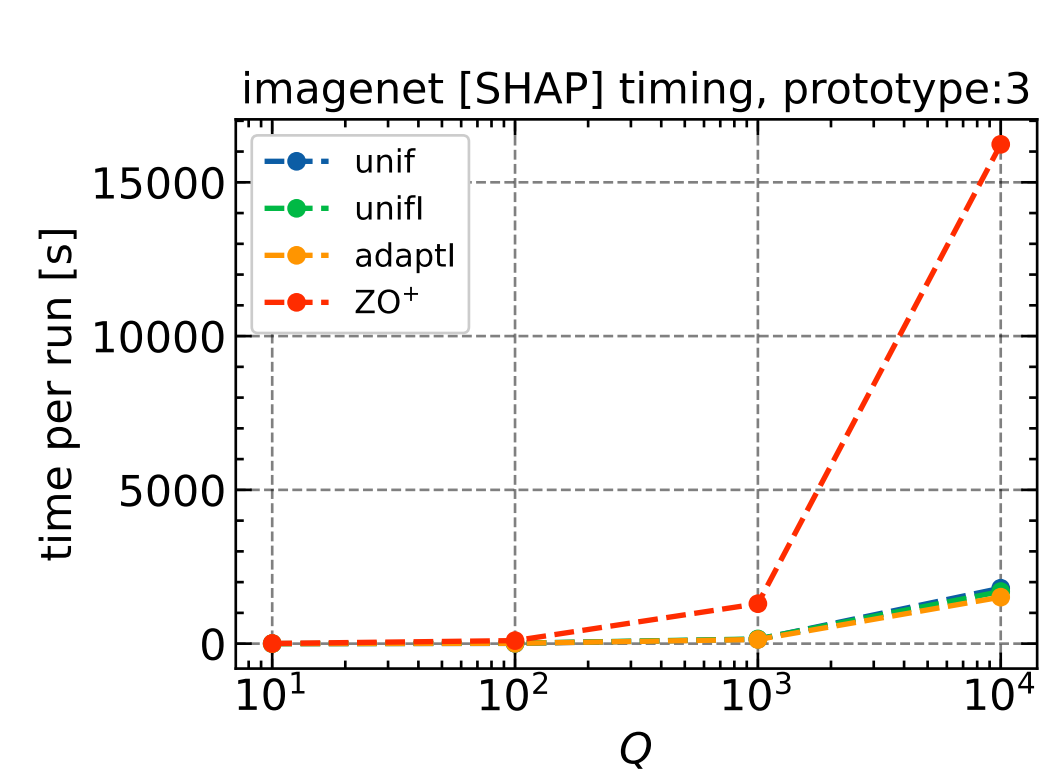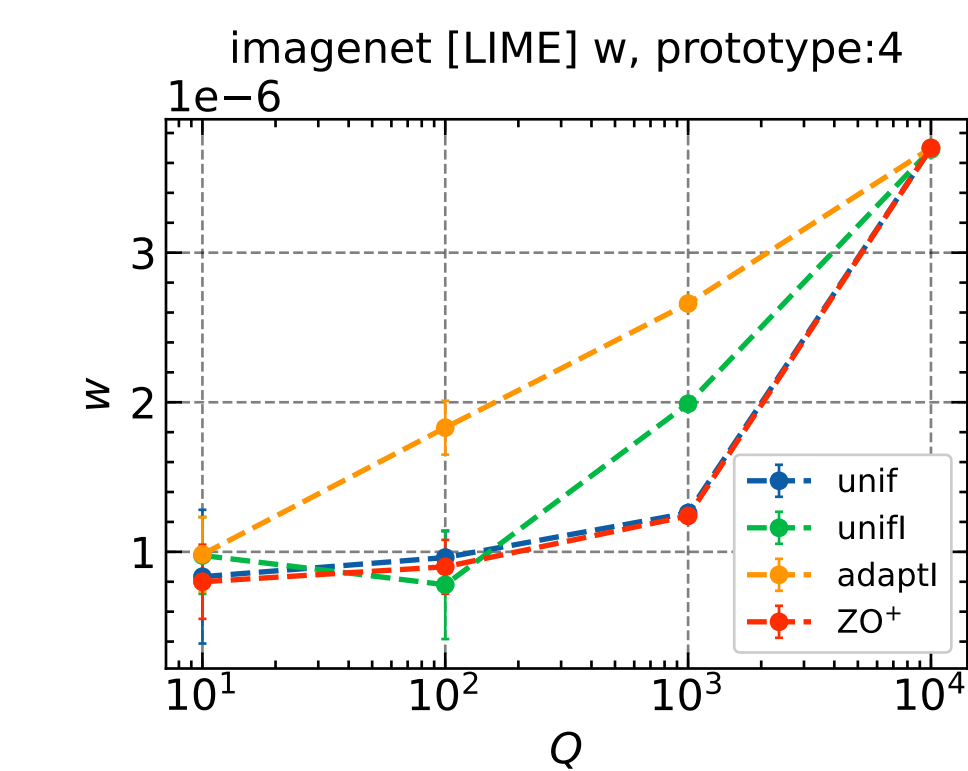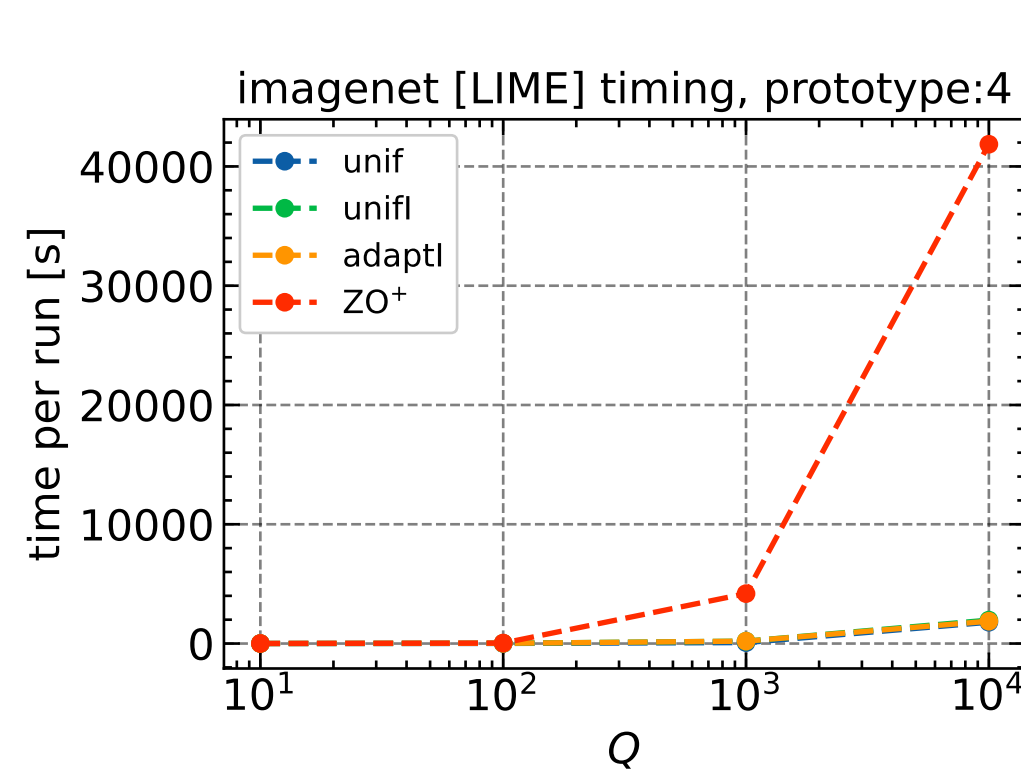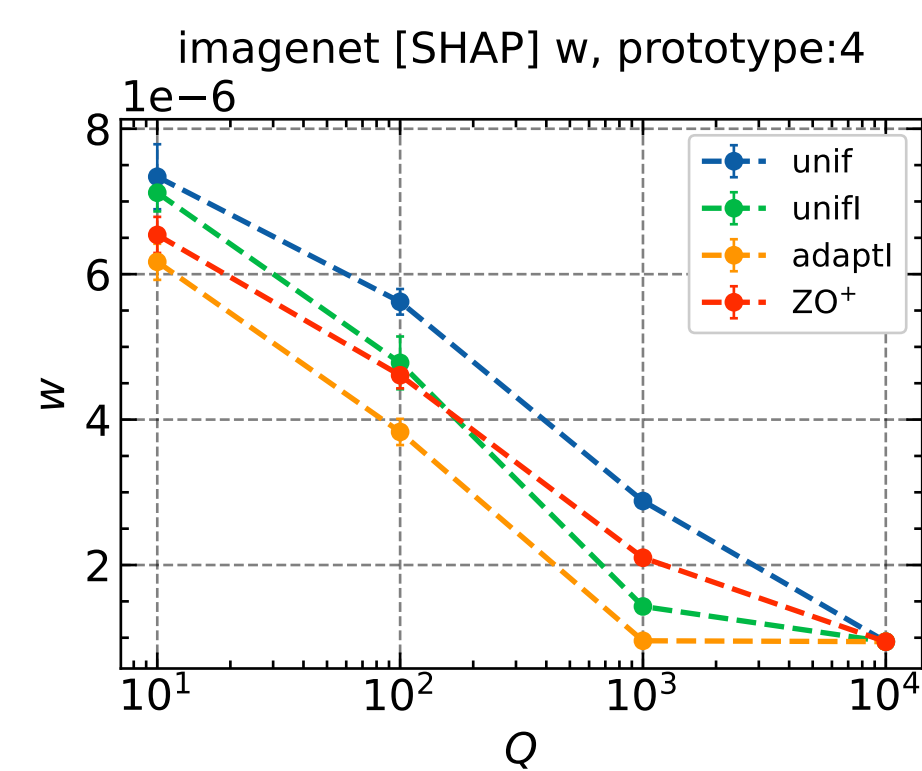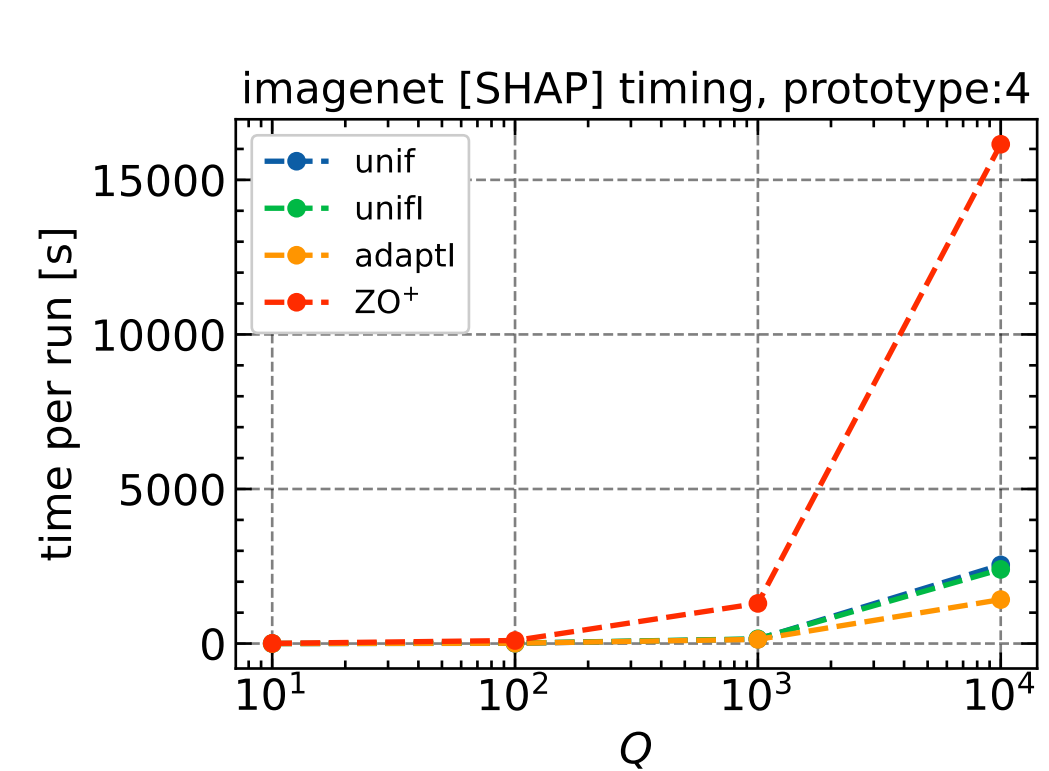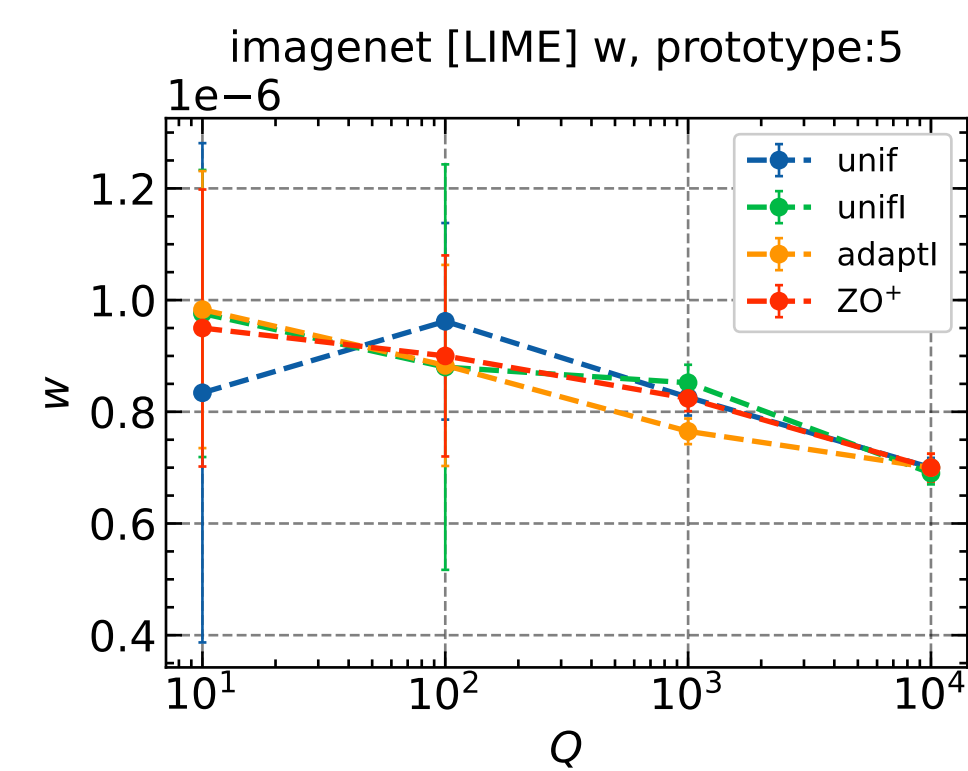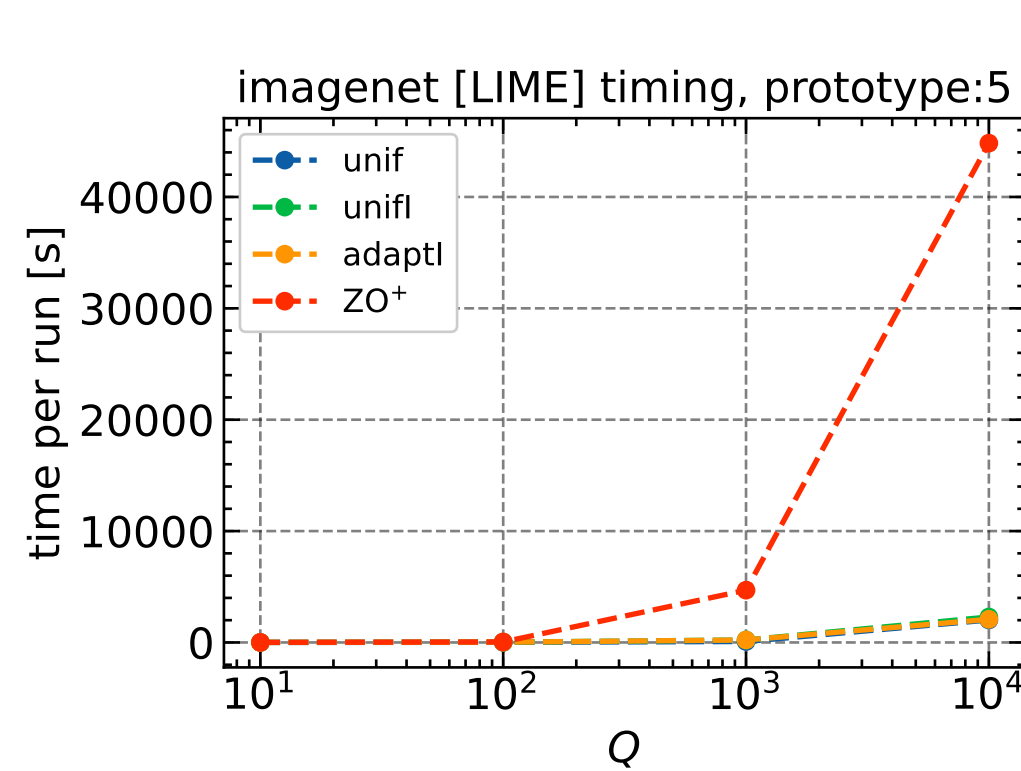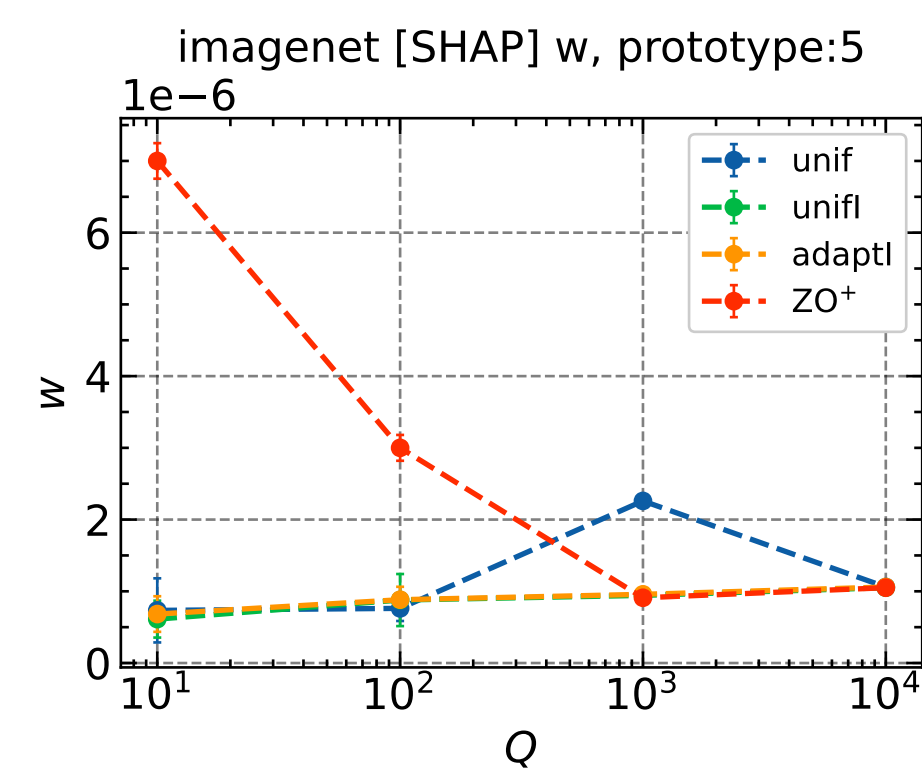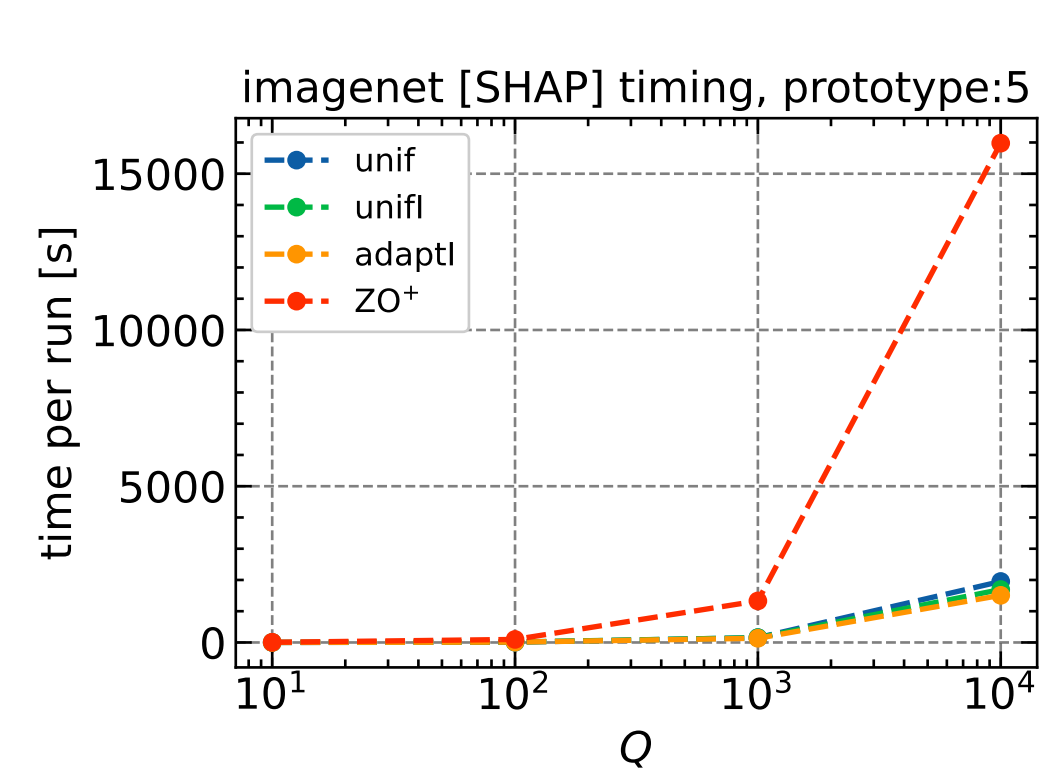

Supplement: supplementary_material [file attachment]

6863, LIME

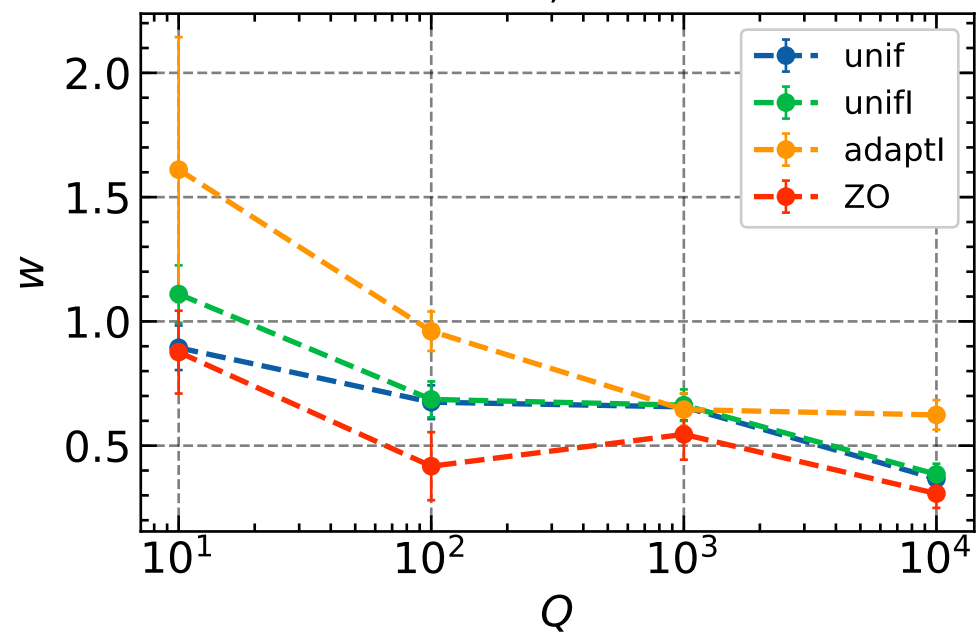

6863, SHAP

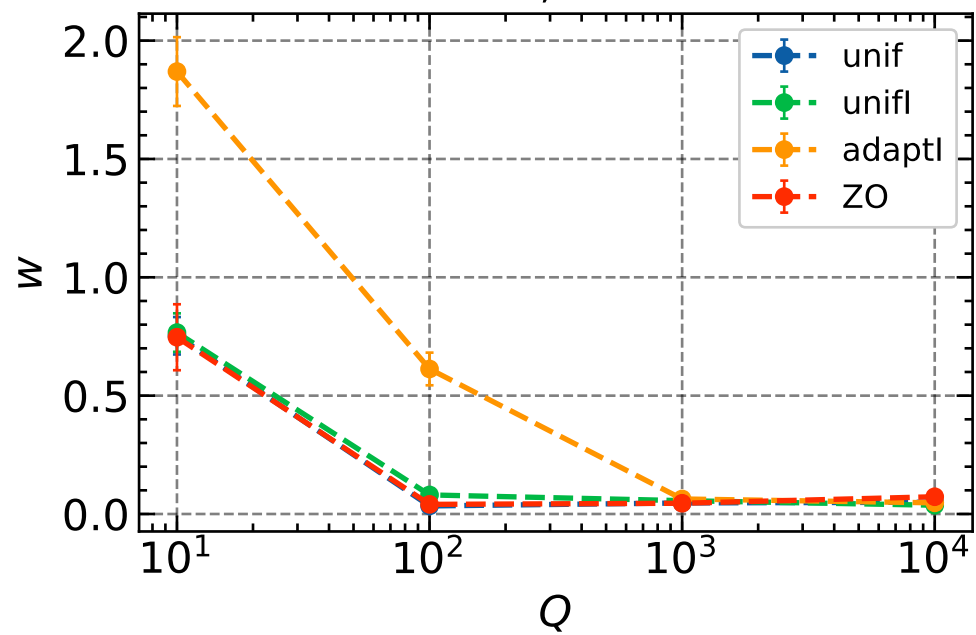

6034, LIME

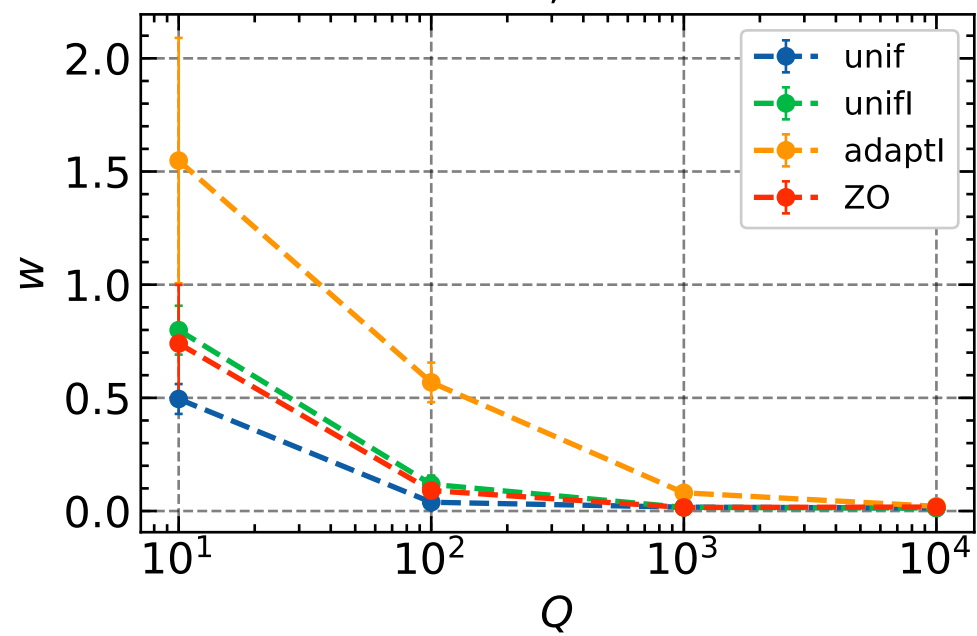

6034, SHAP

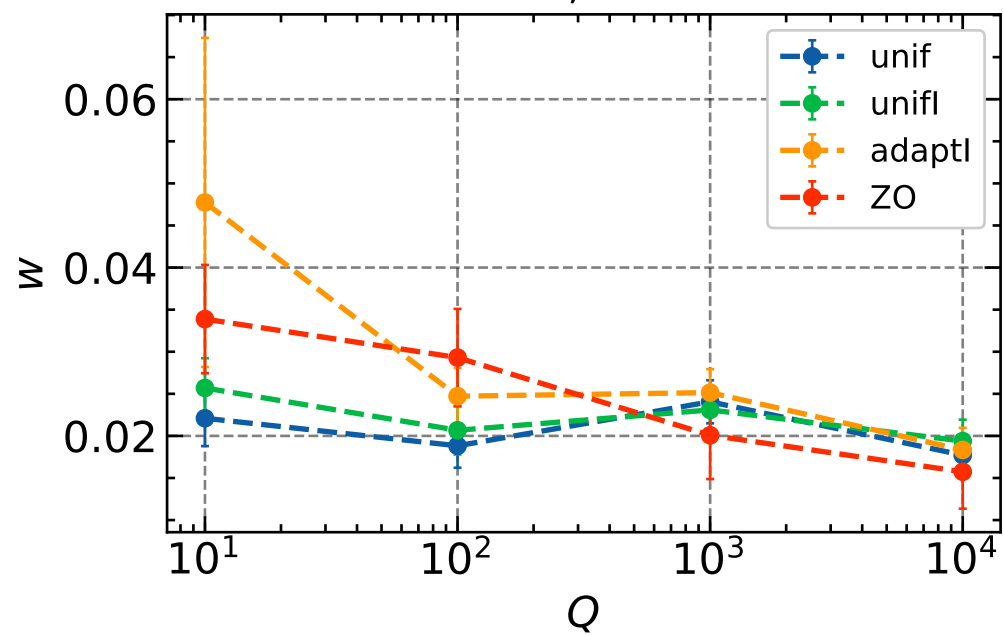

1922, LIME

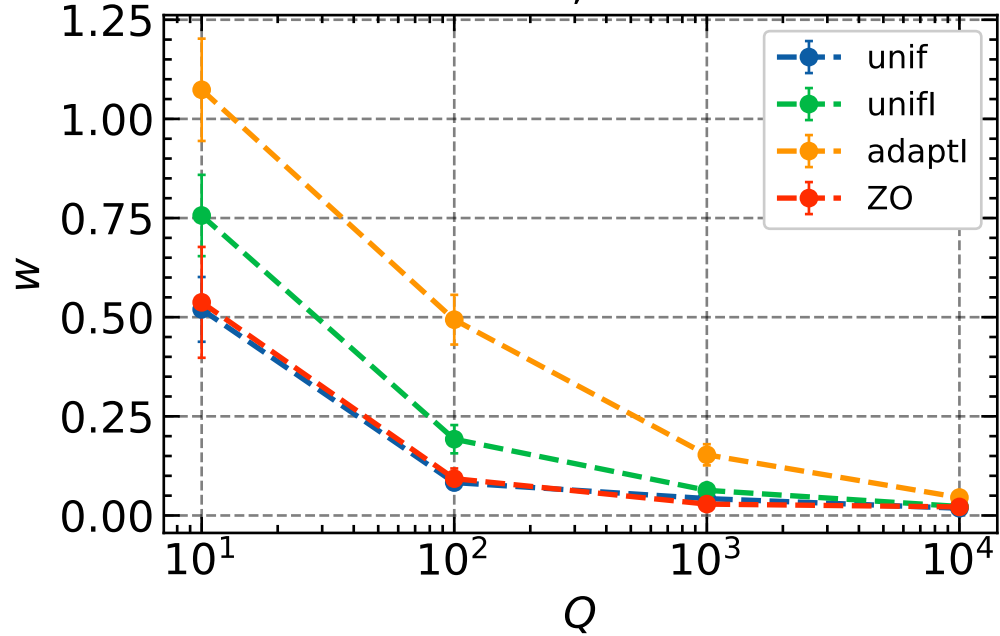

1922, SHAP

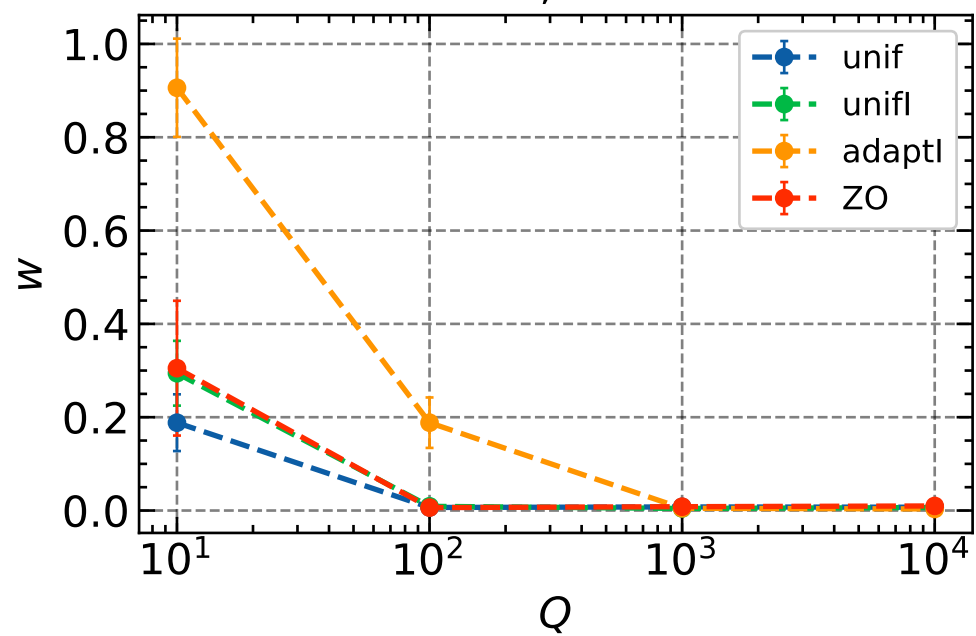

2390, LIME

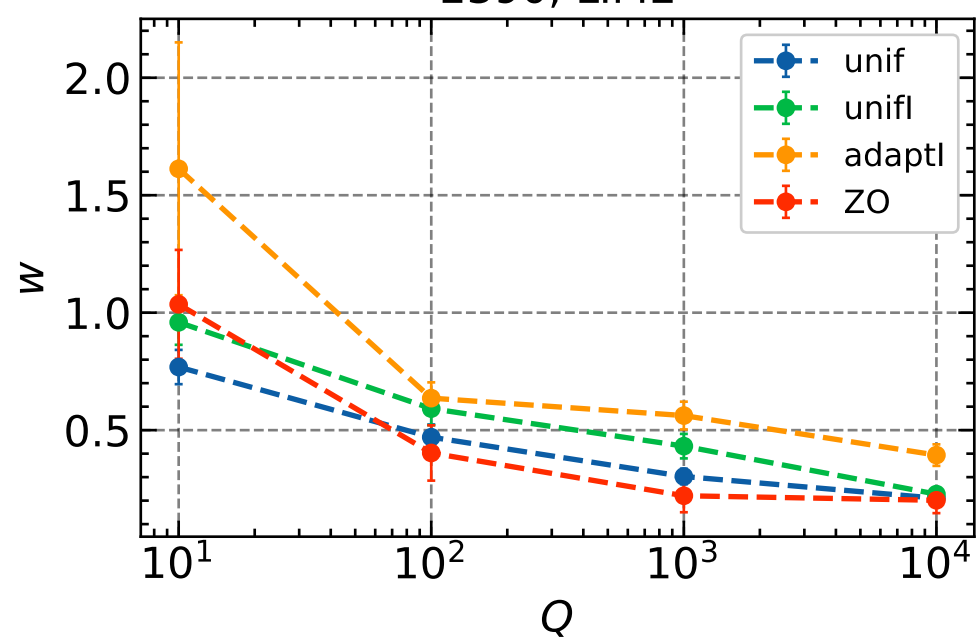

2390, SHAP

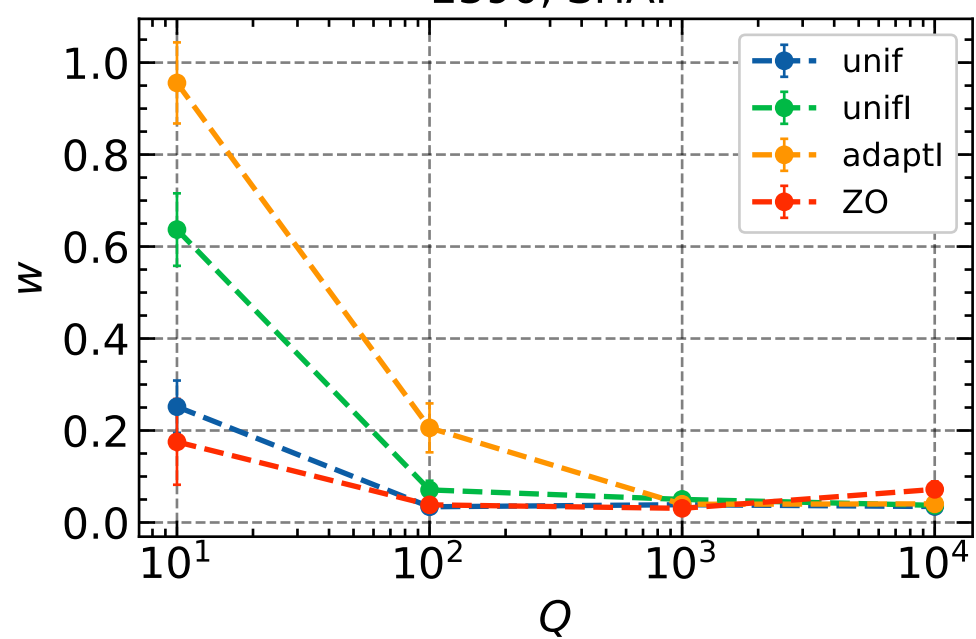

6667, LIME

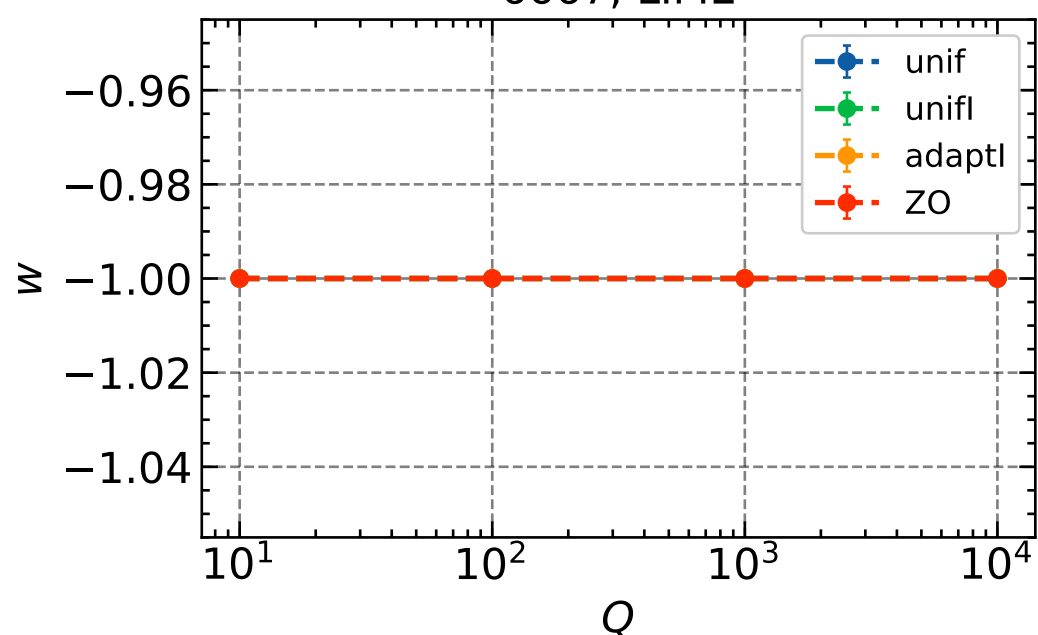

6667, SHAP

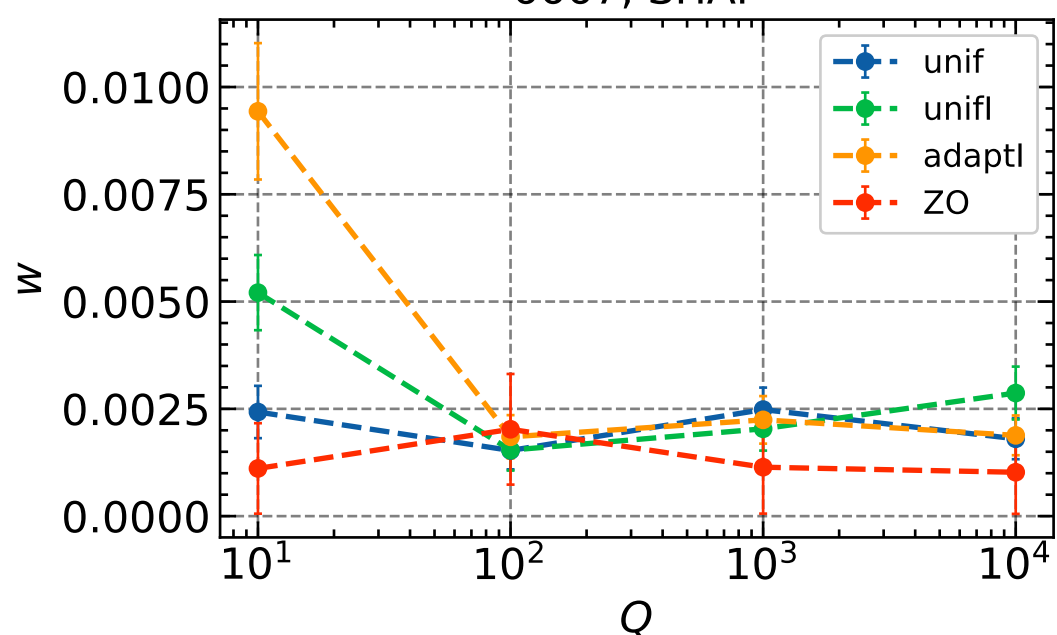

Supplement: supplementary_material [file attachment]

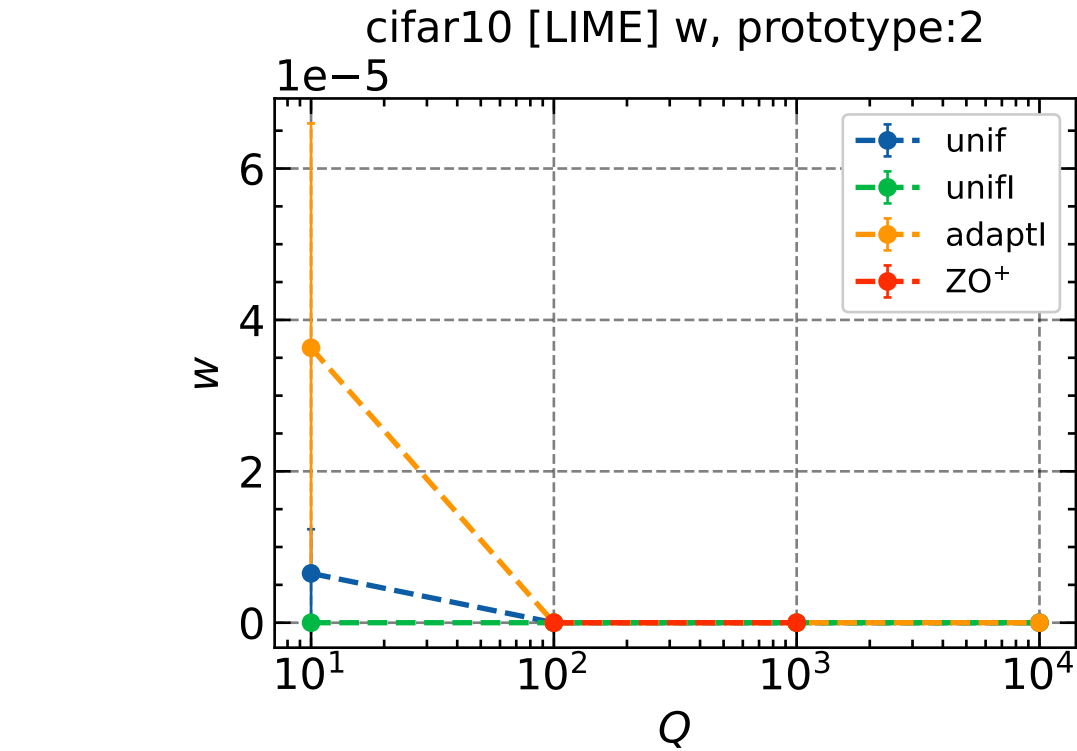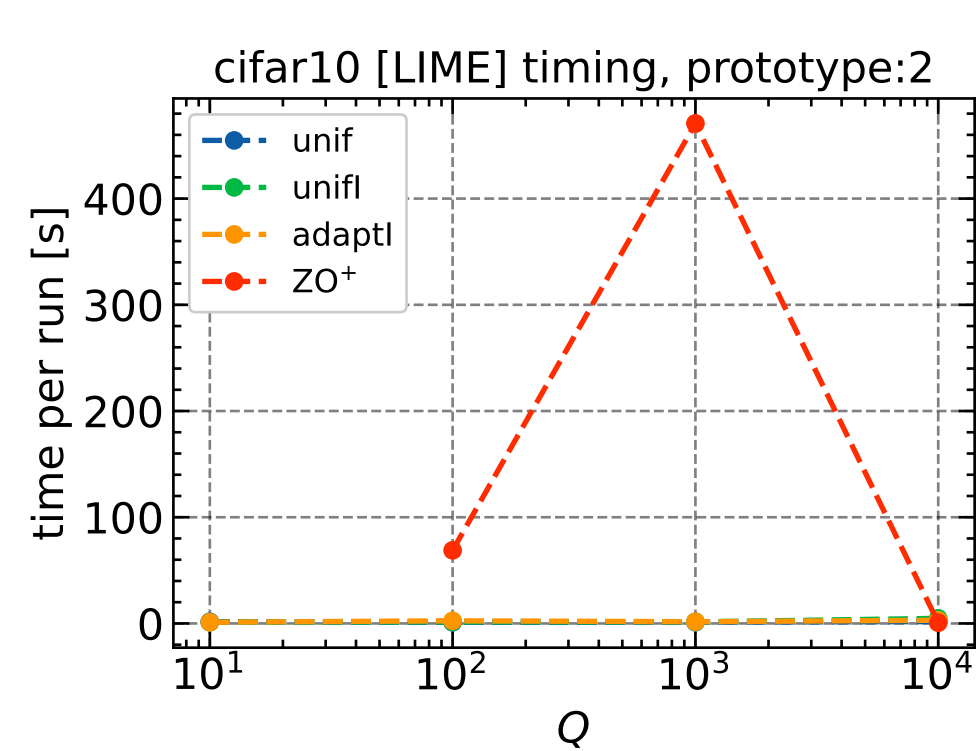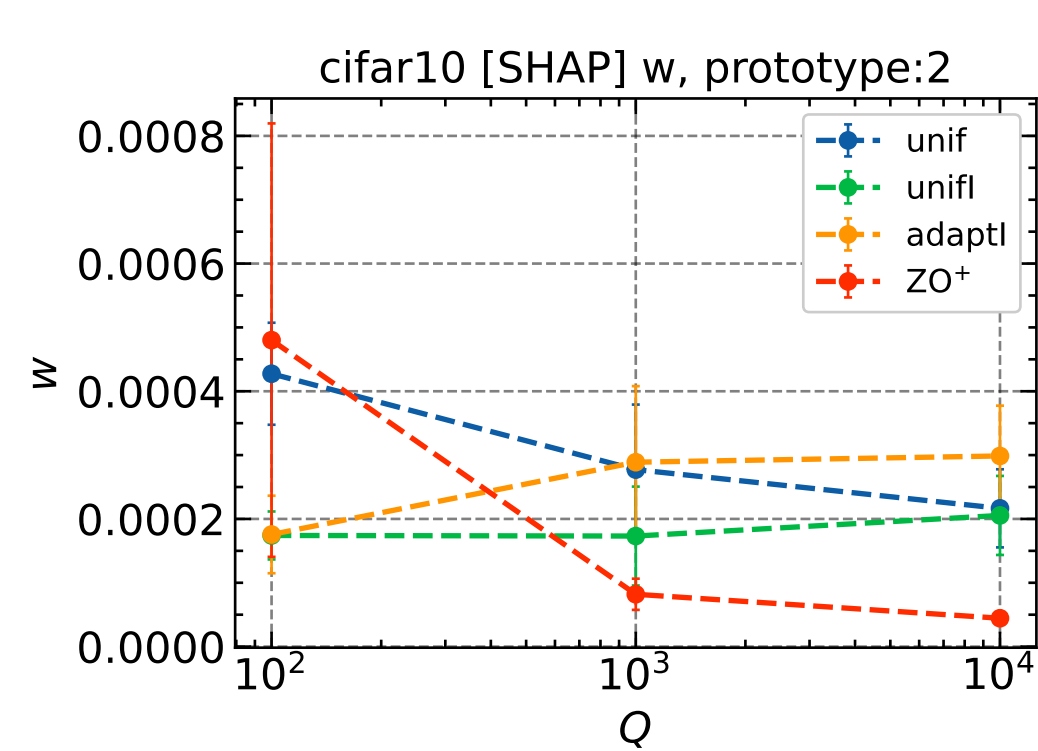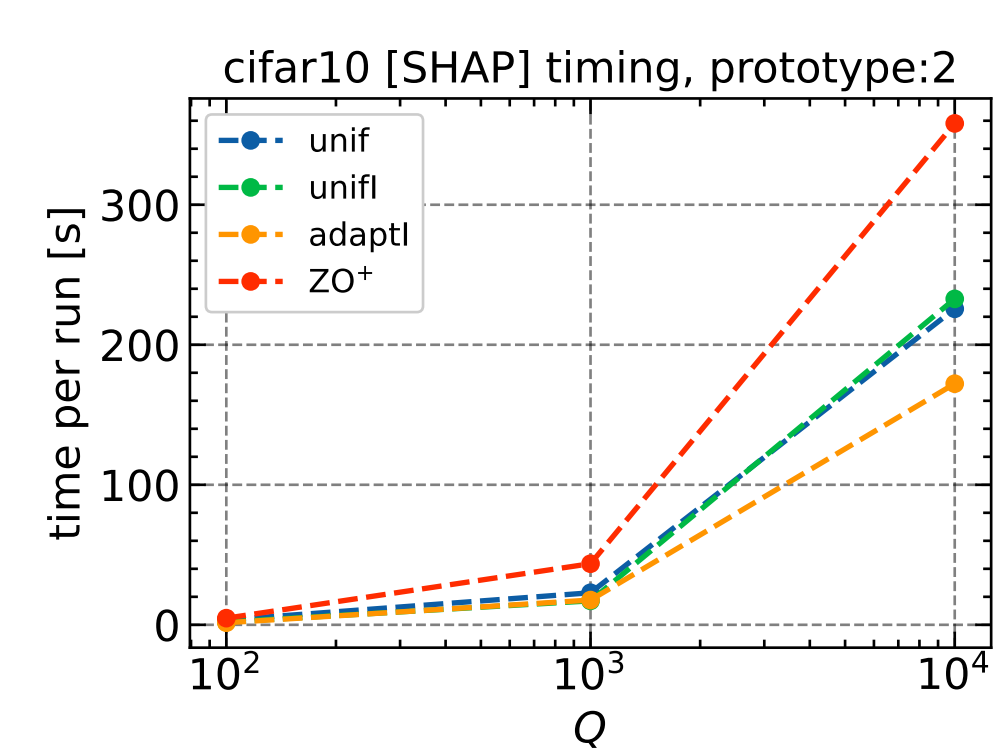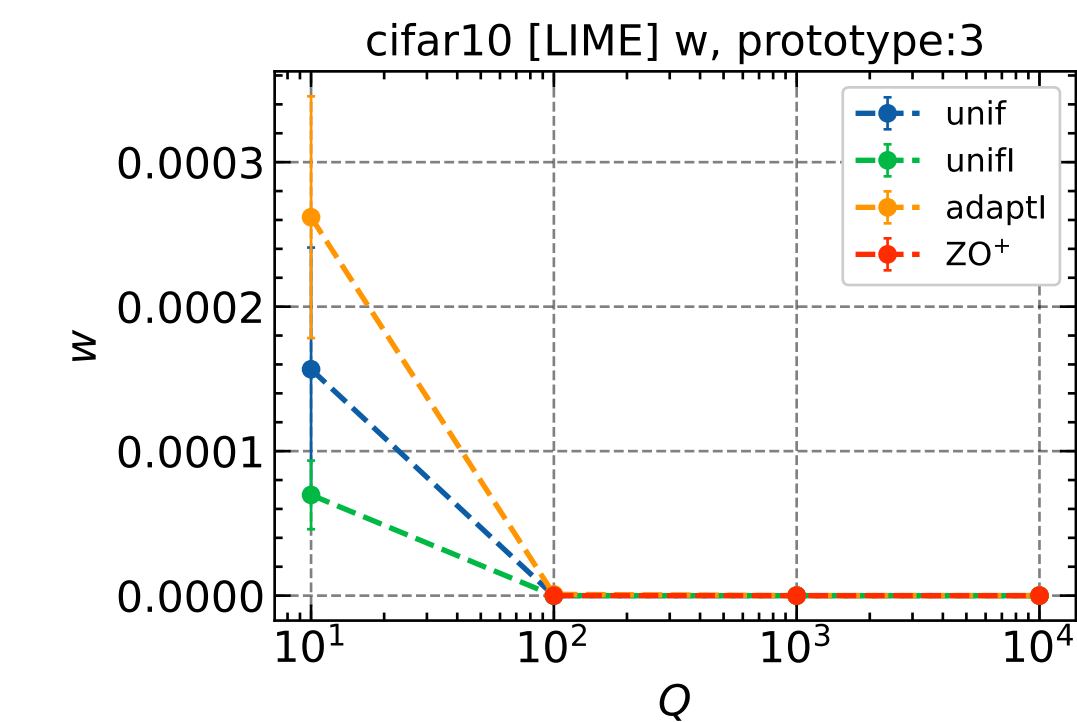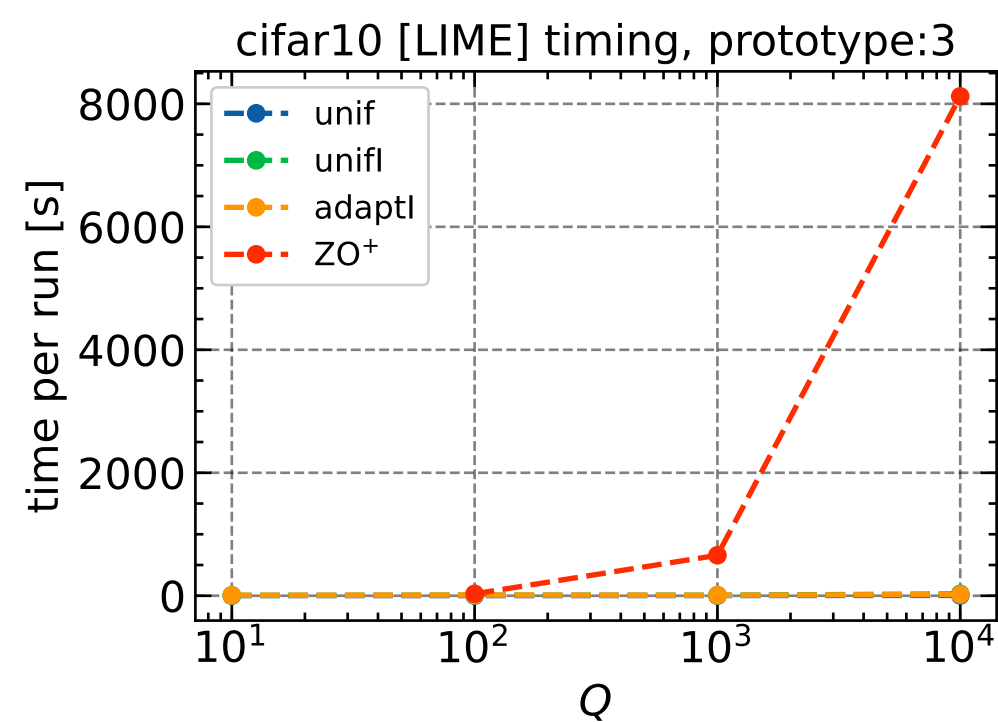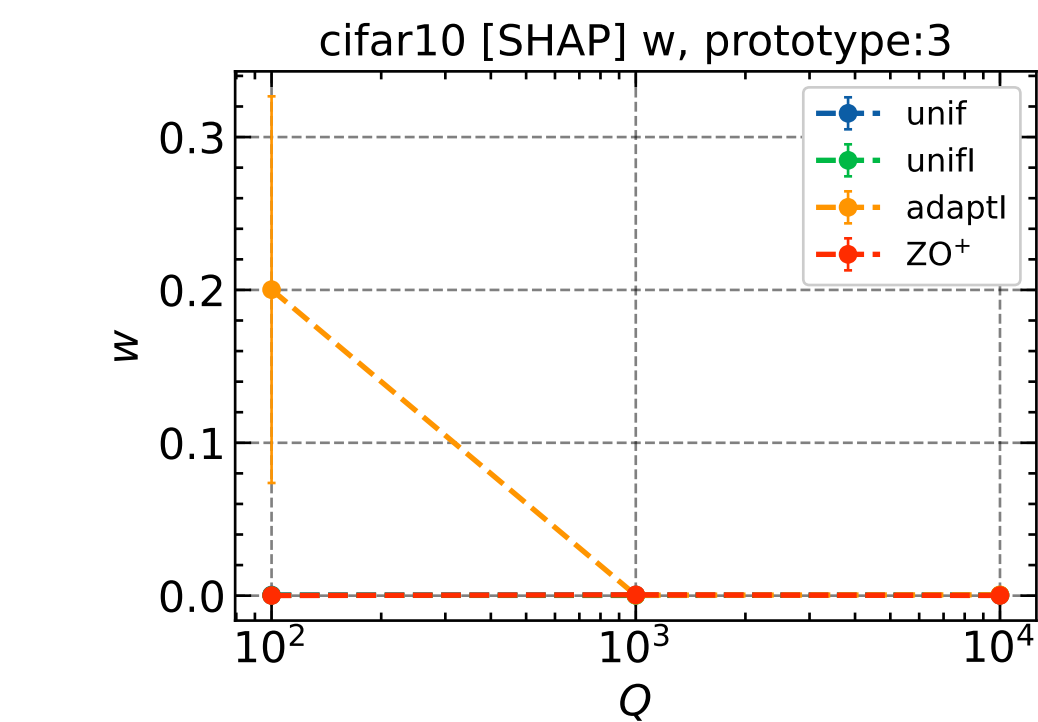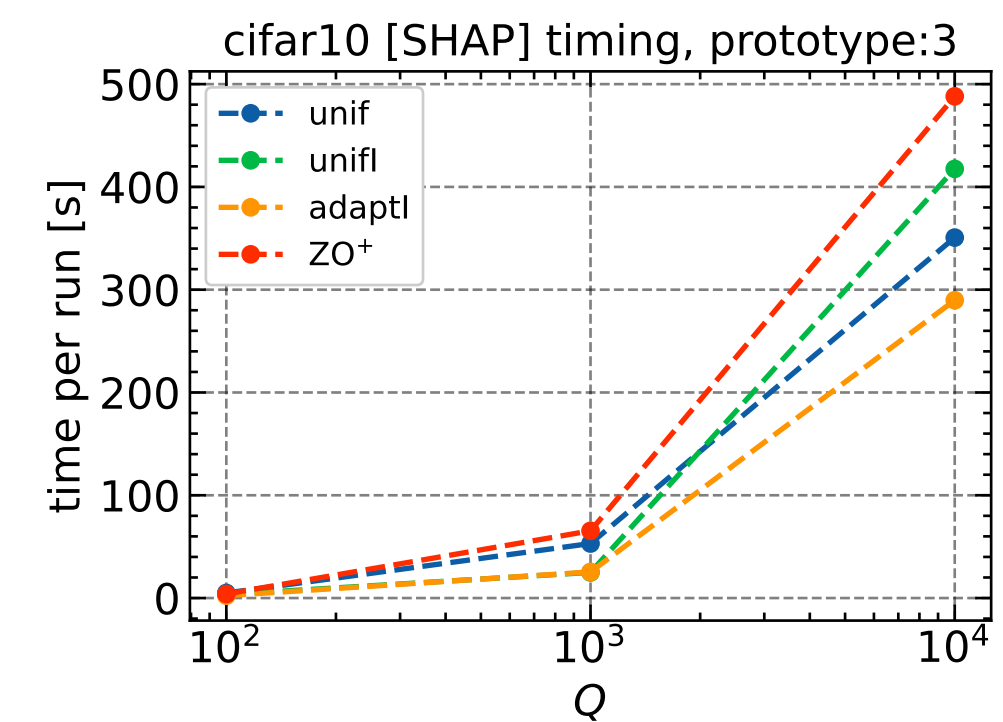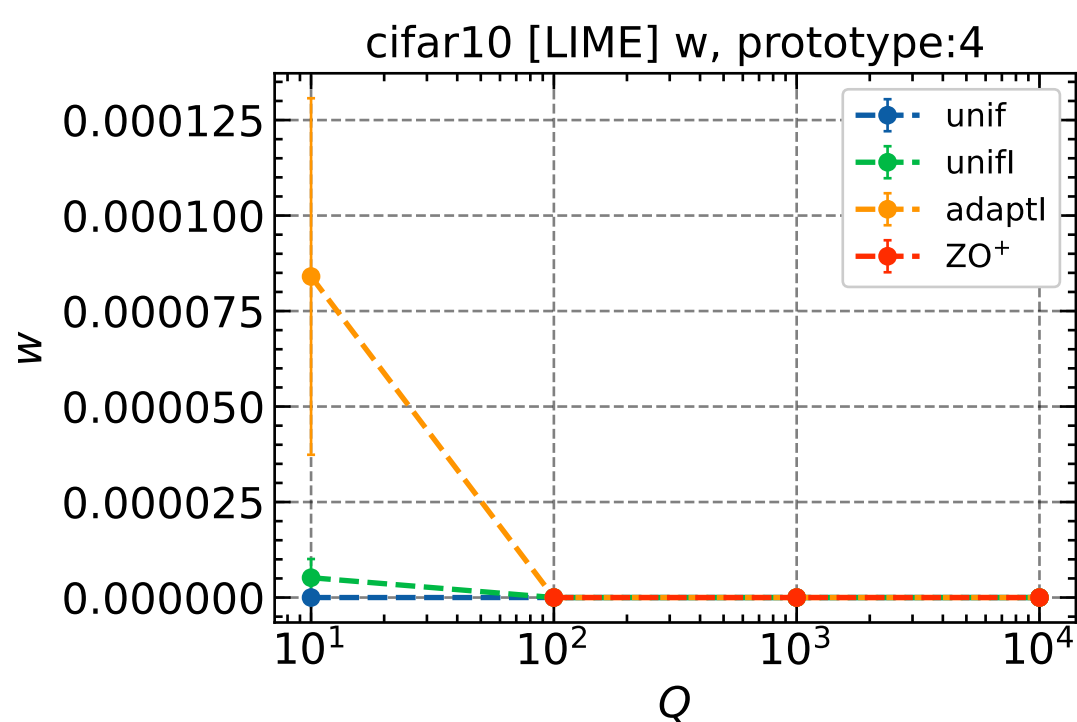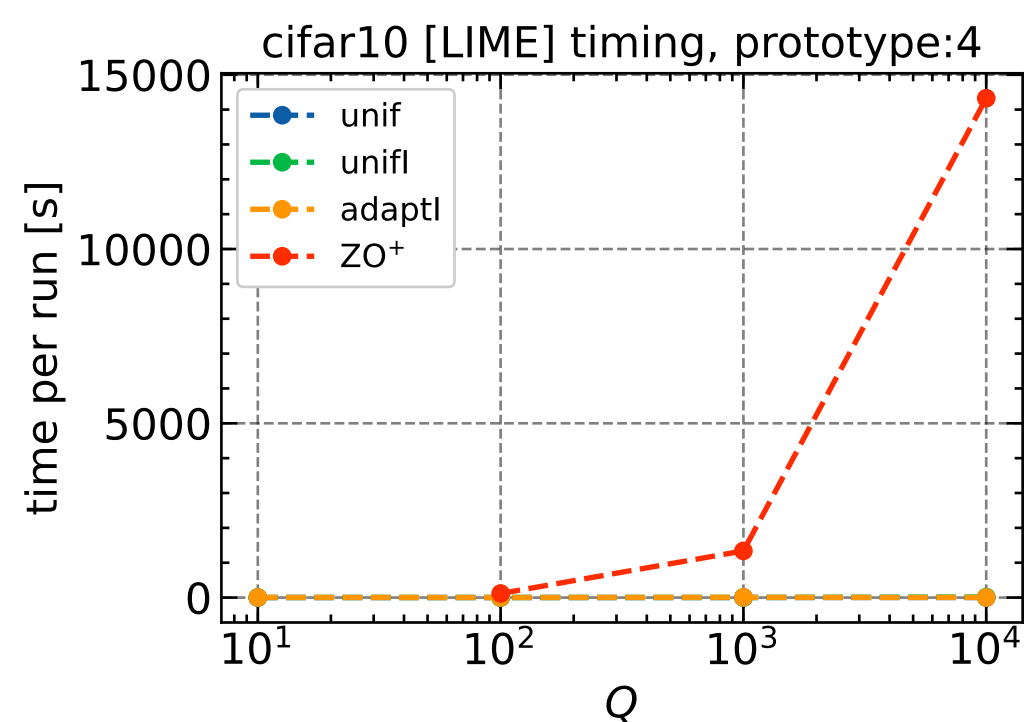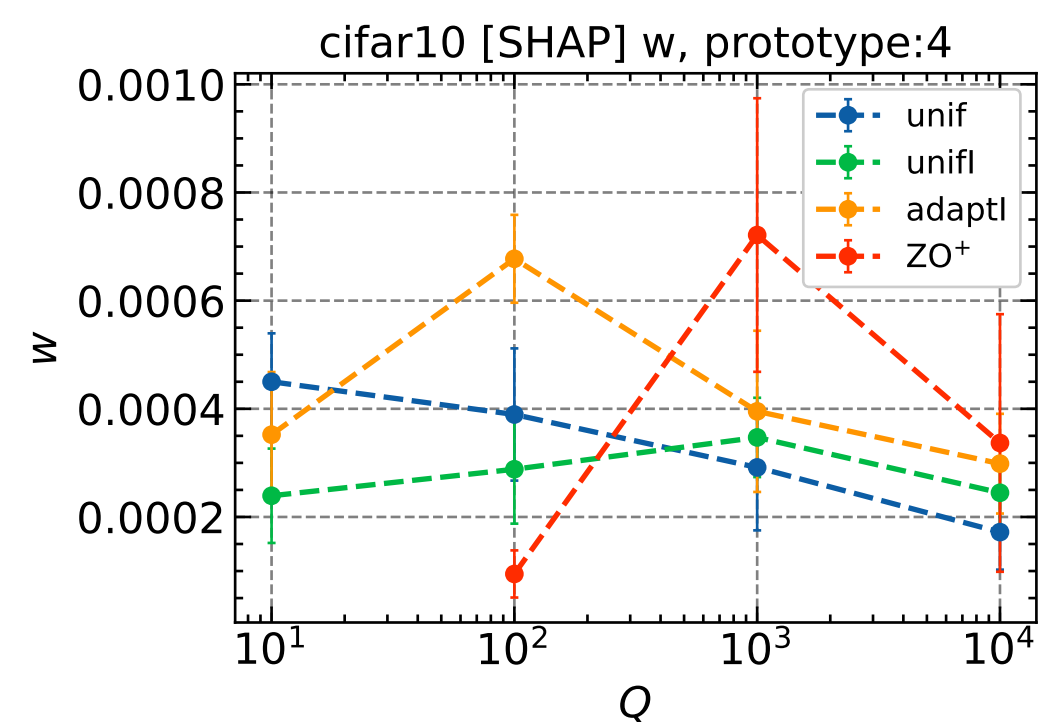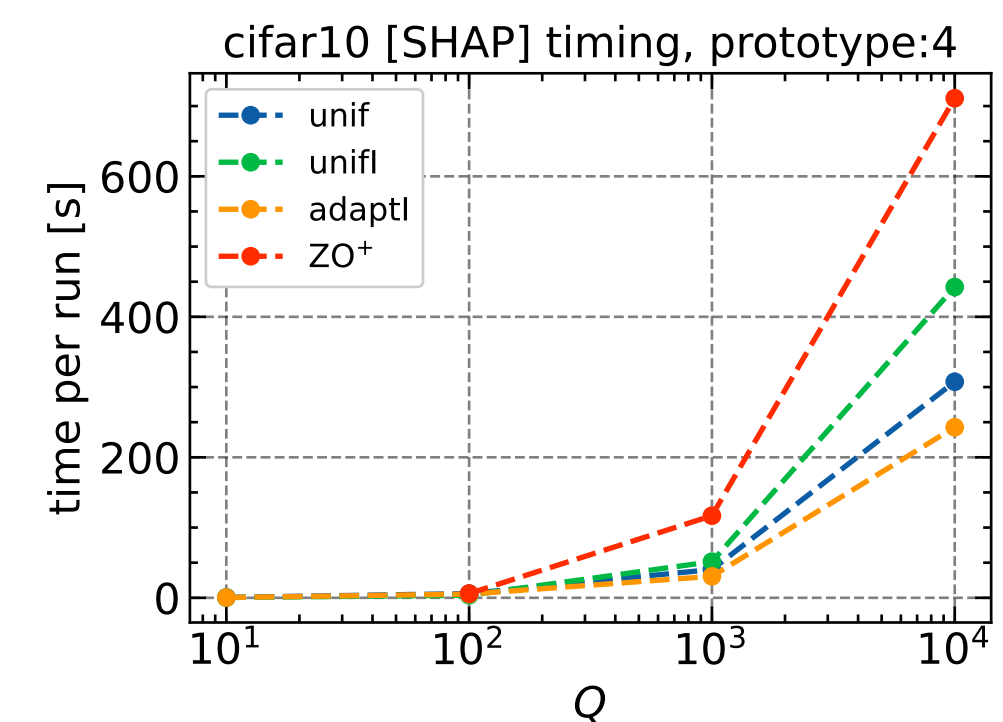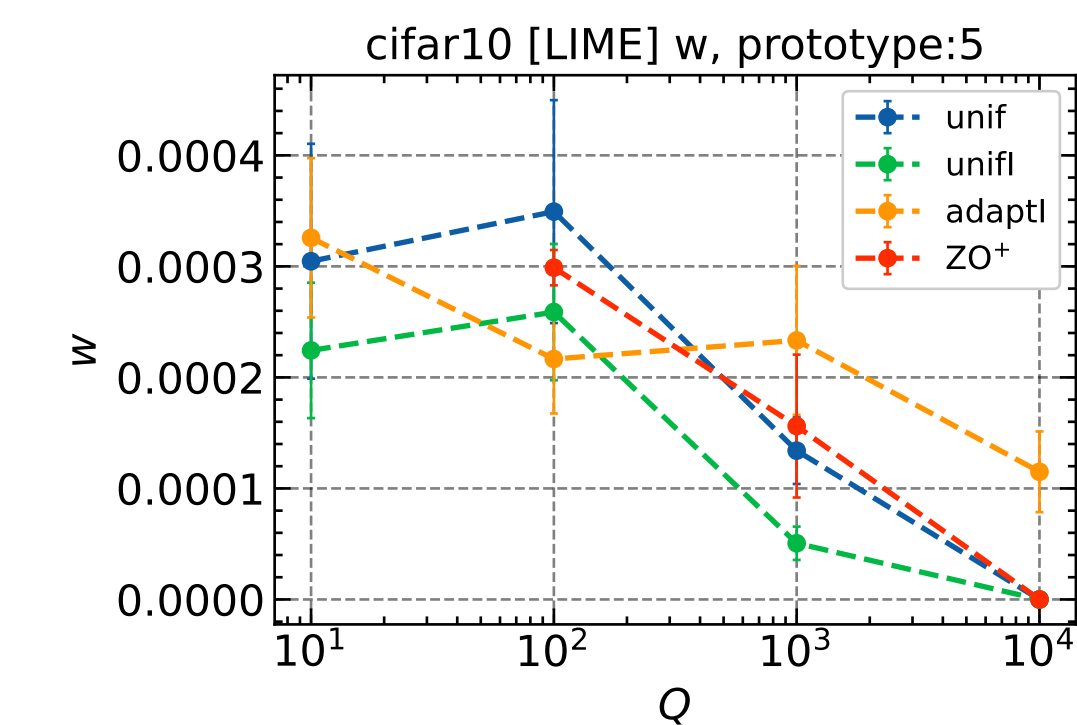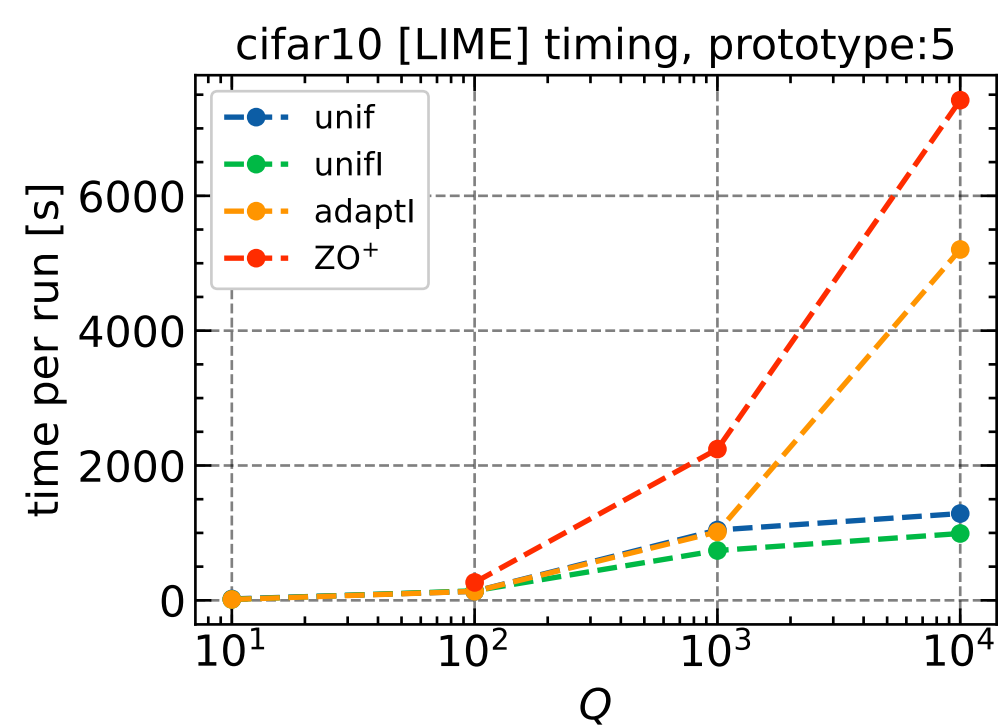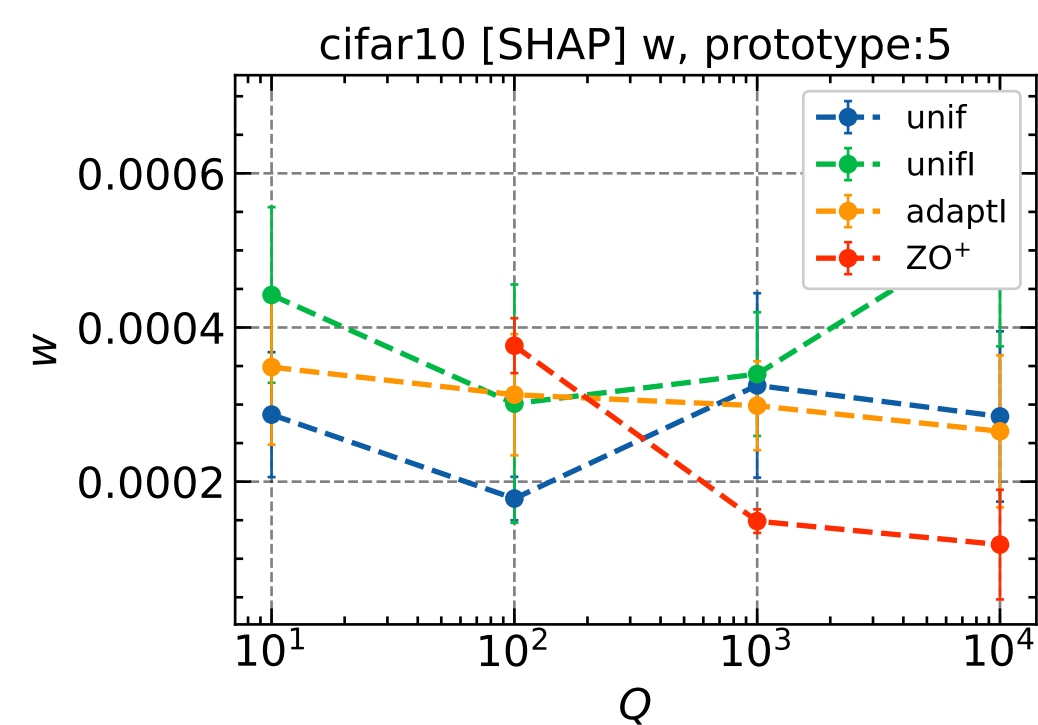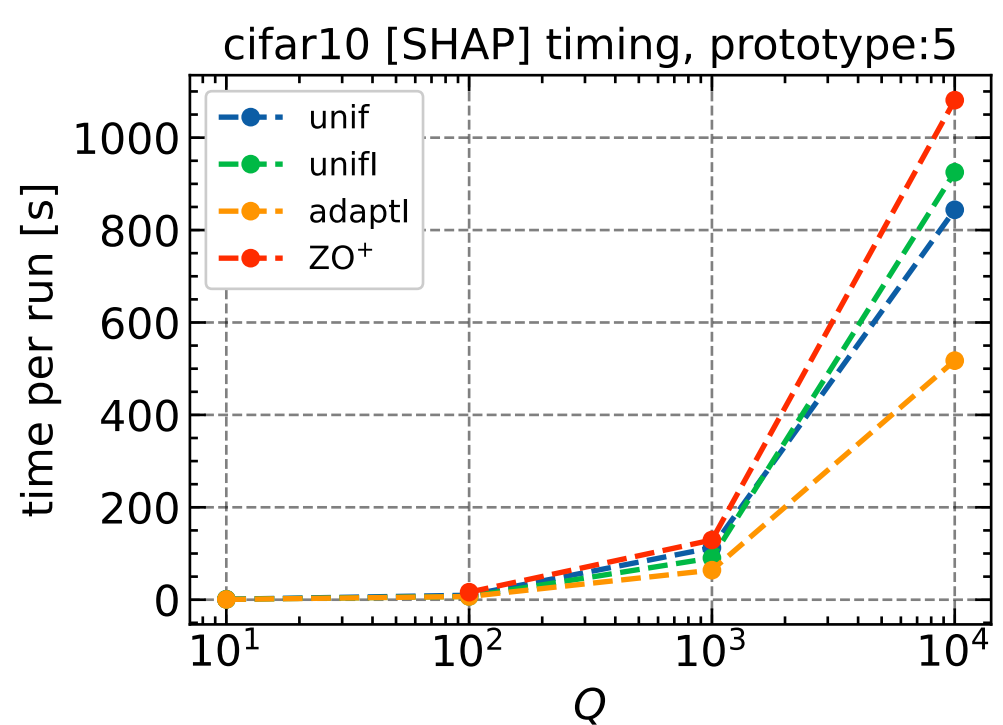

Supplement: supplementary_material [file attachment]

5863, LIME

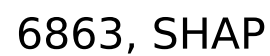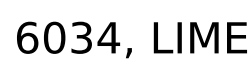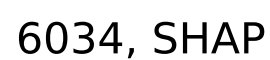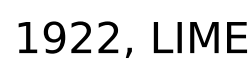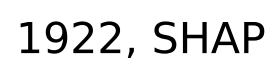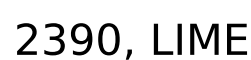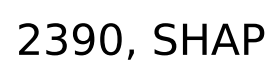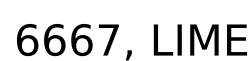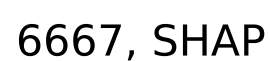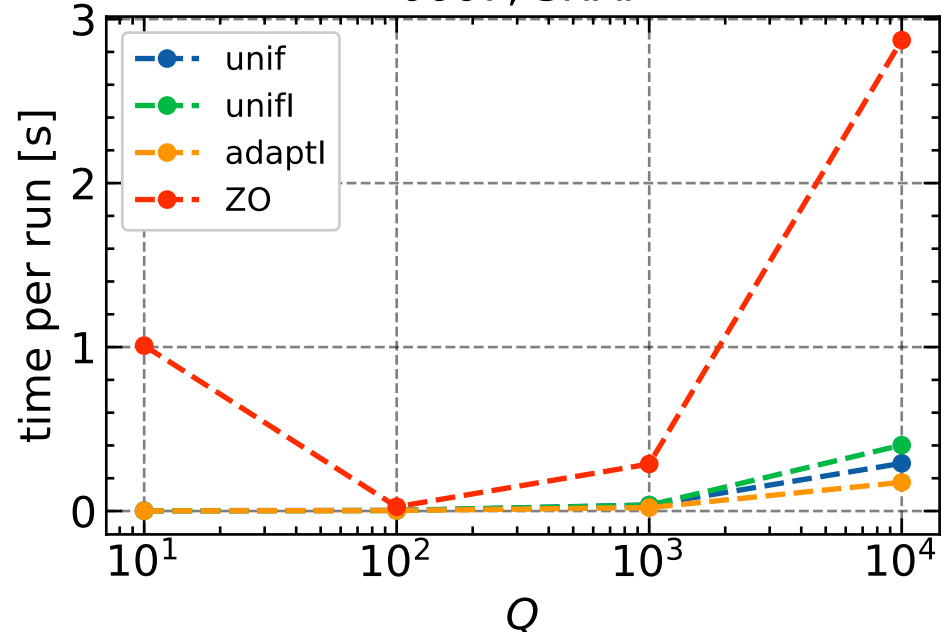

Supplement: supplementary_material [file attachment]

249, LIME

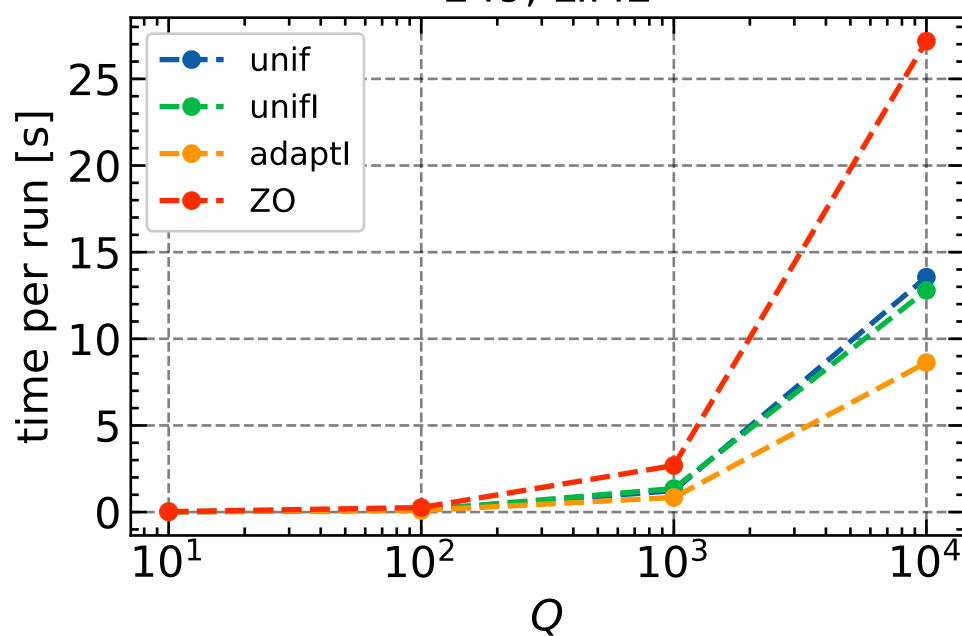

249, SHAP

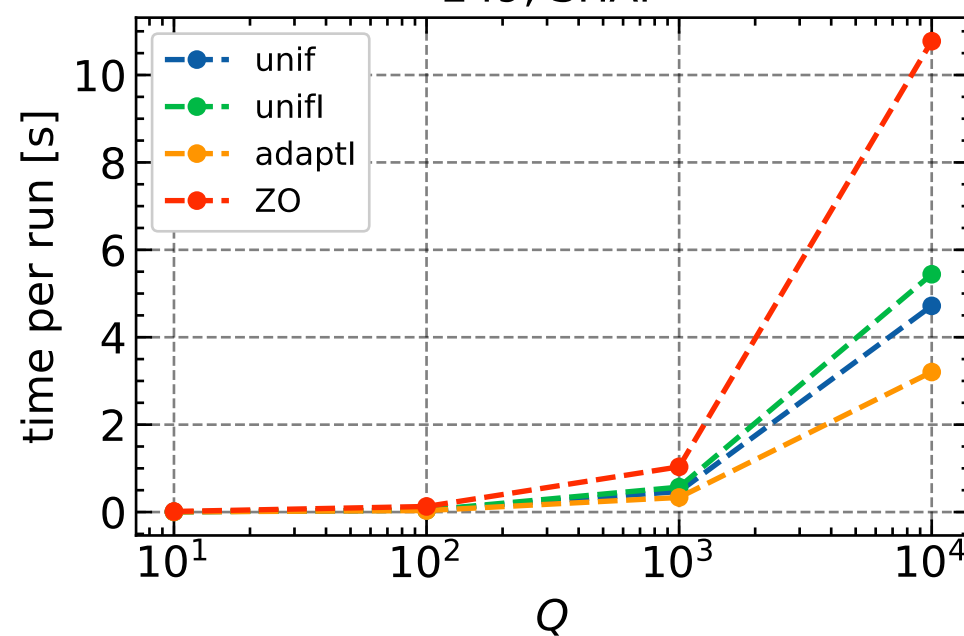

287, LIME

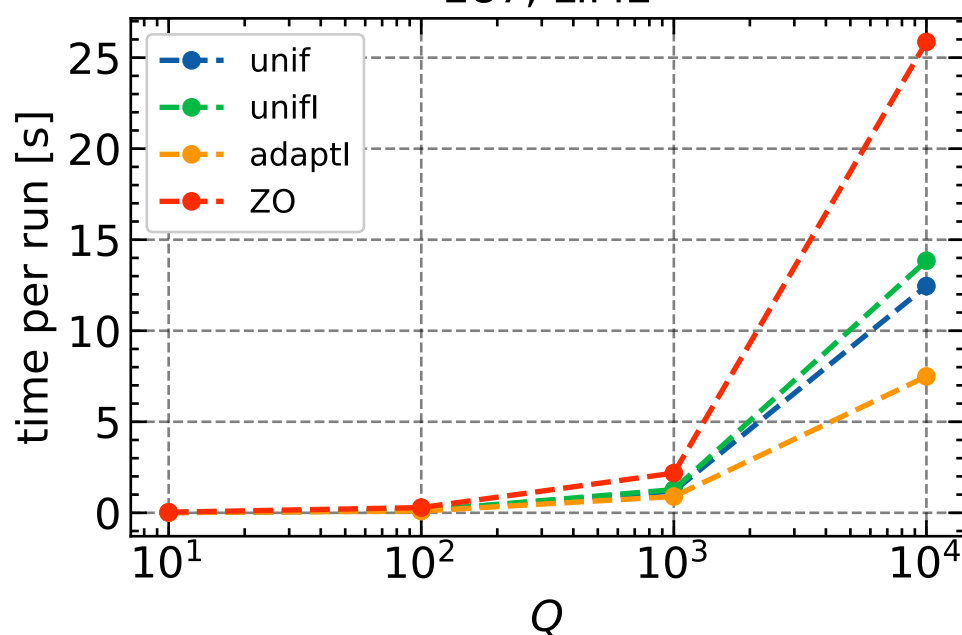

287, SHAP

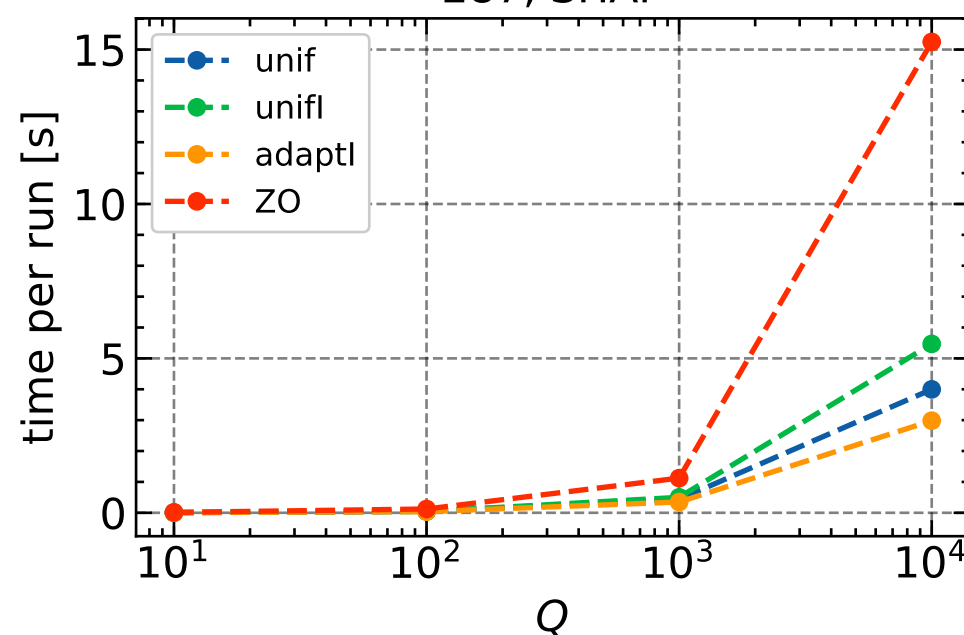

158, LIME

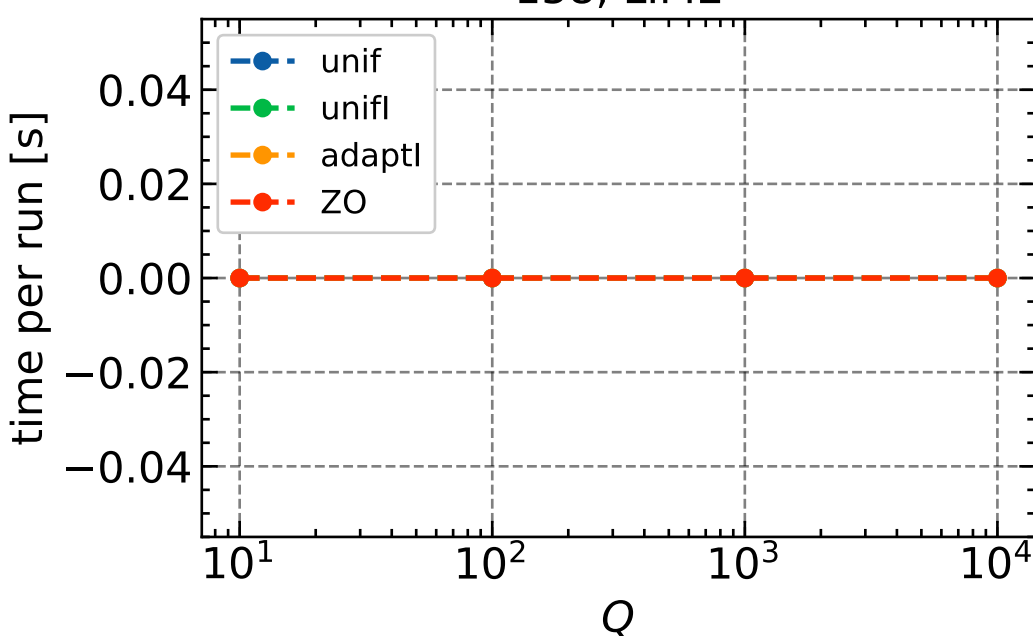

158, SHAP

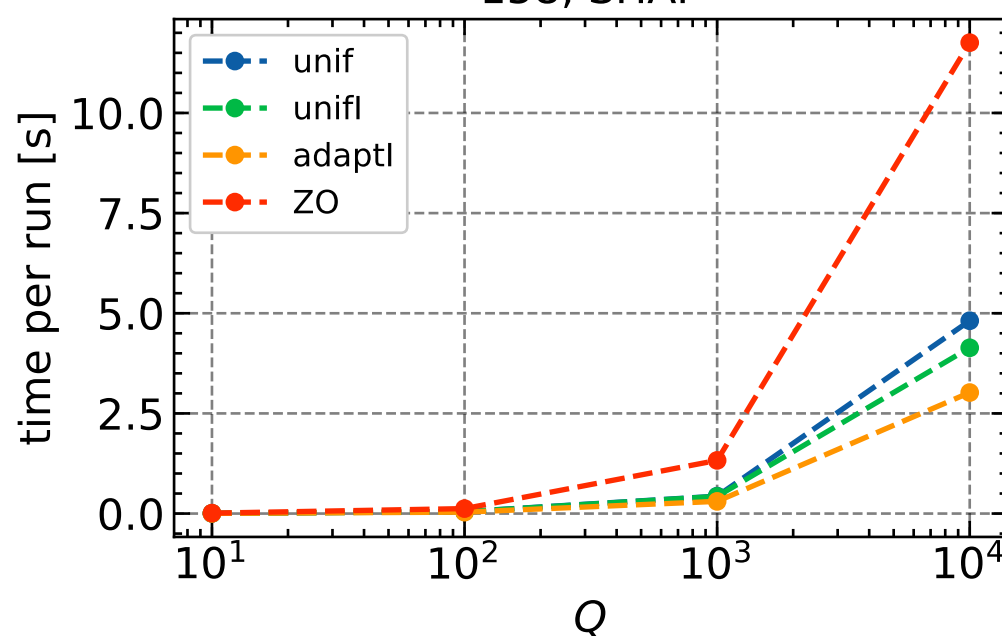

269, LIME

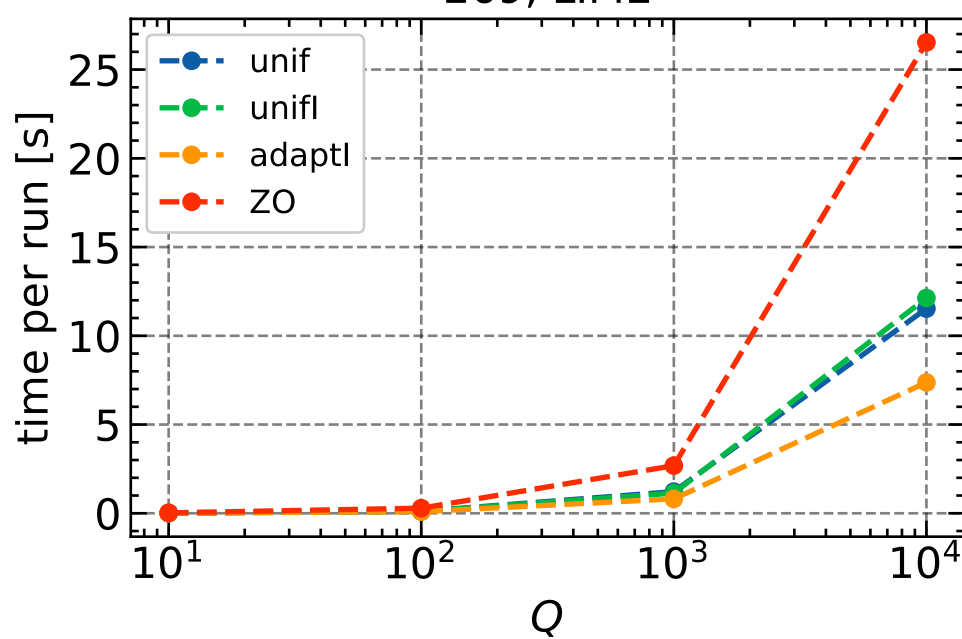

269, SHAP

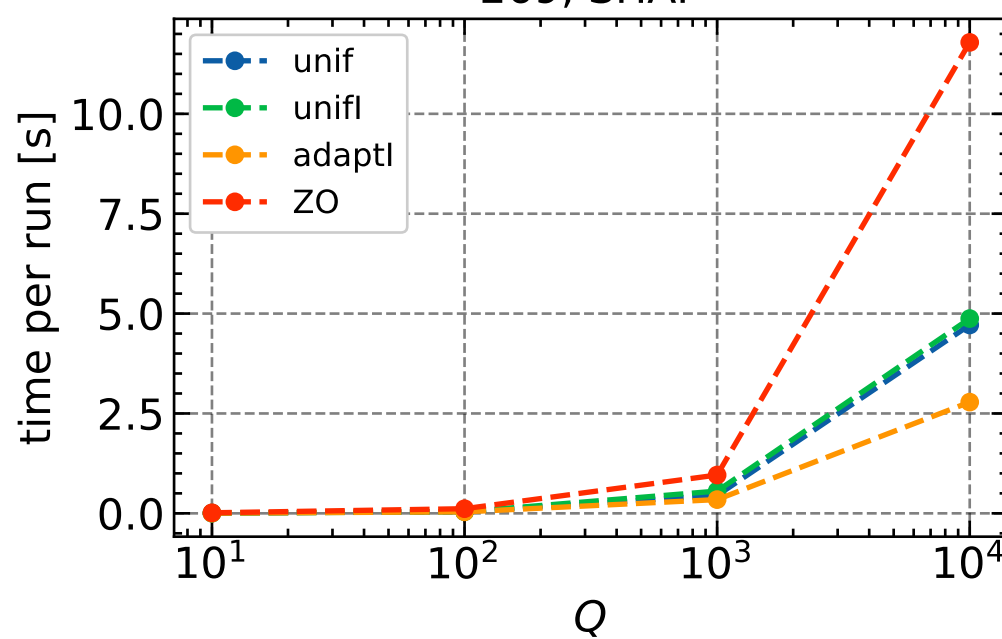

257, LIME

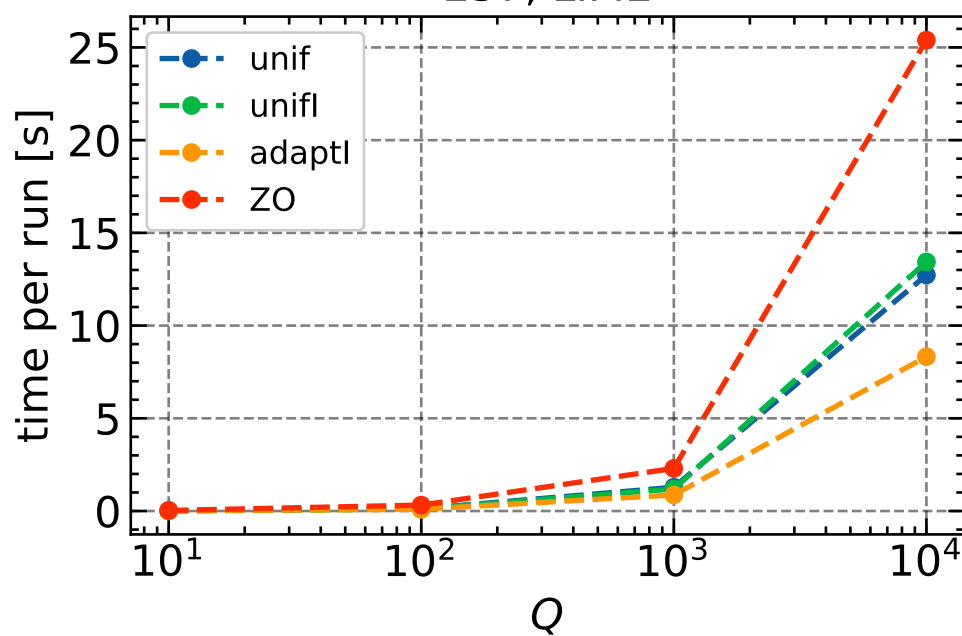

257, SHAP

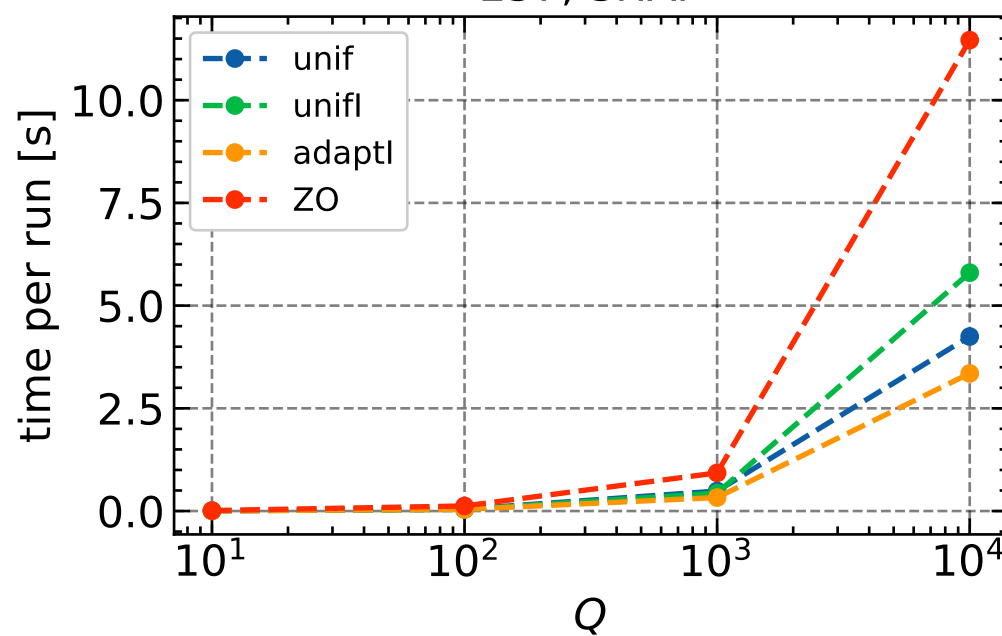

Supplement: supplementary_material [file attachment]

arrhythmia [LIME] w

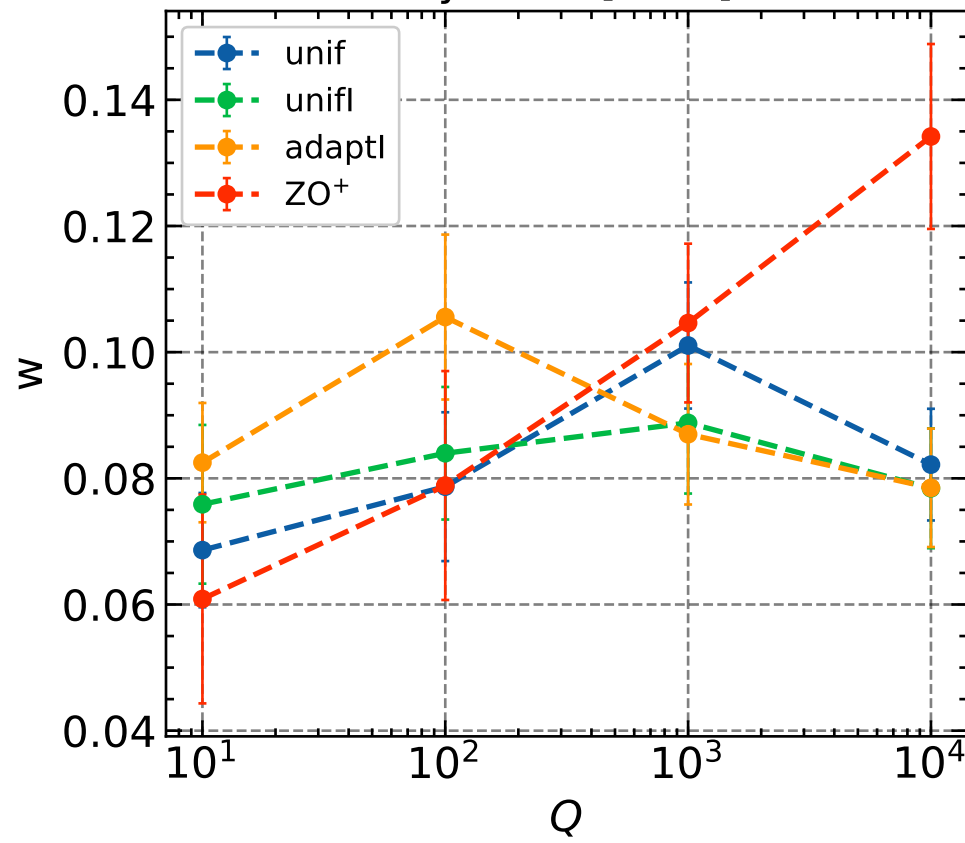

arrhythmia [LIME] timing

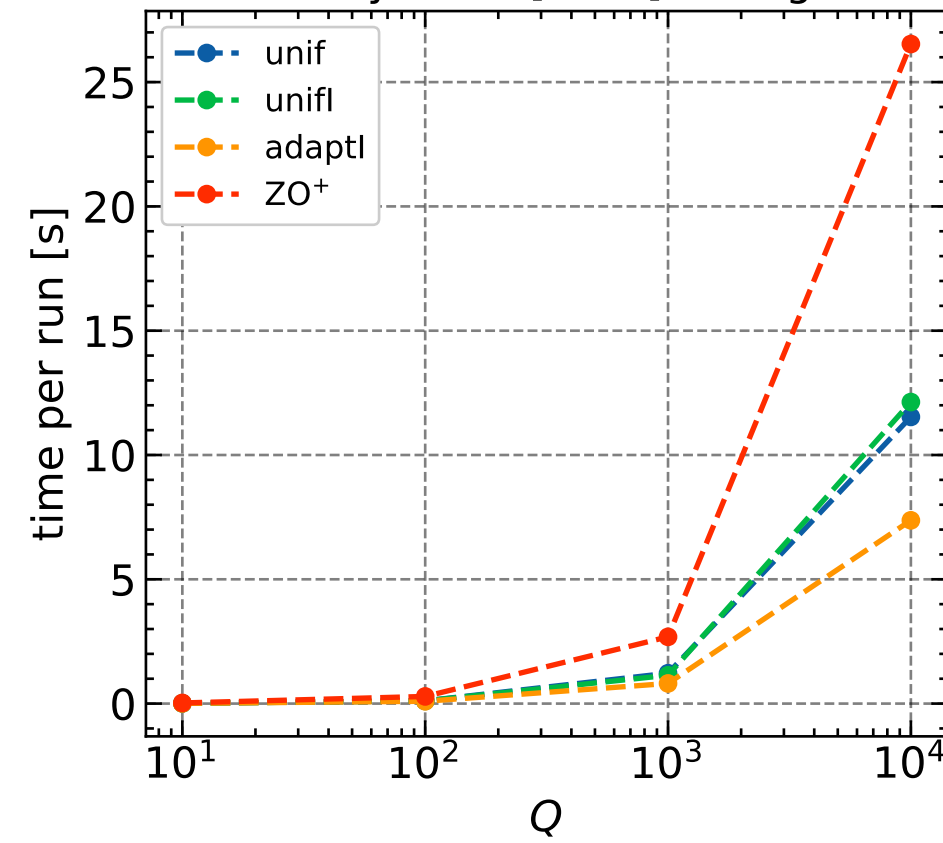

arrhythmia [SHAP] w

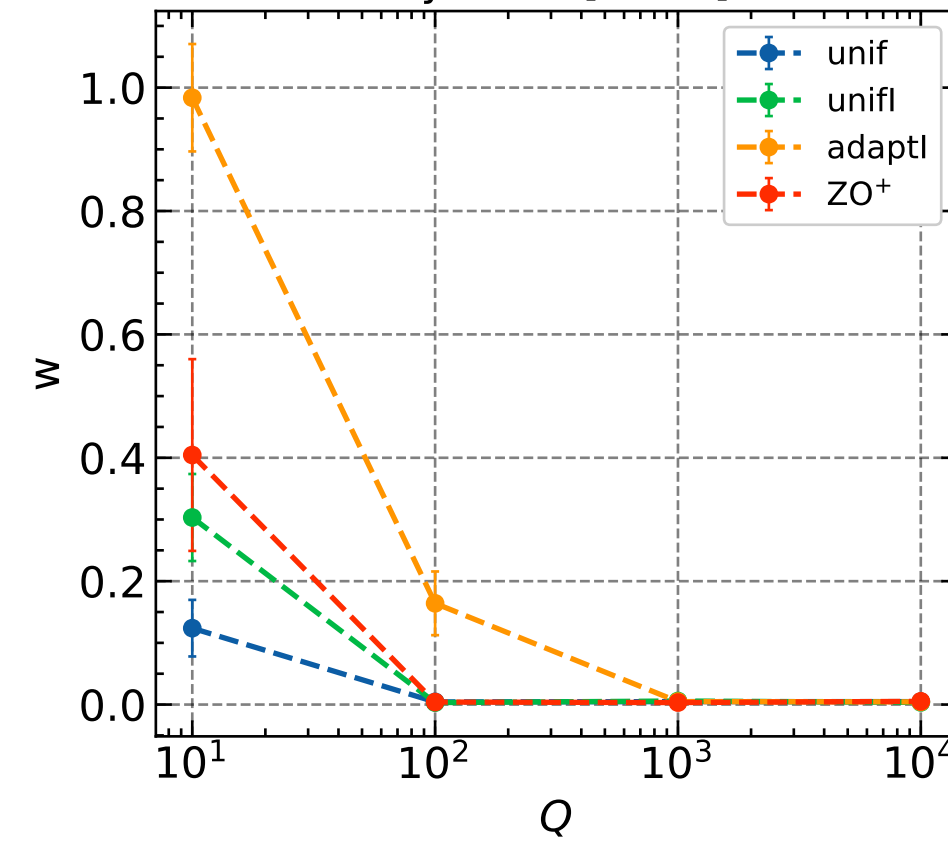

arrhythmia [SHAP] timing

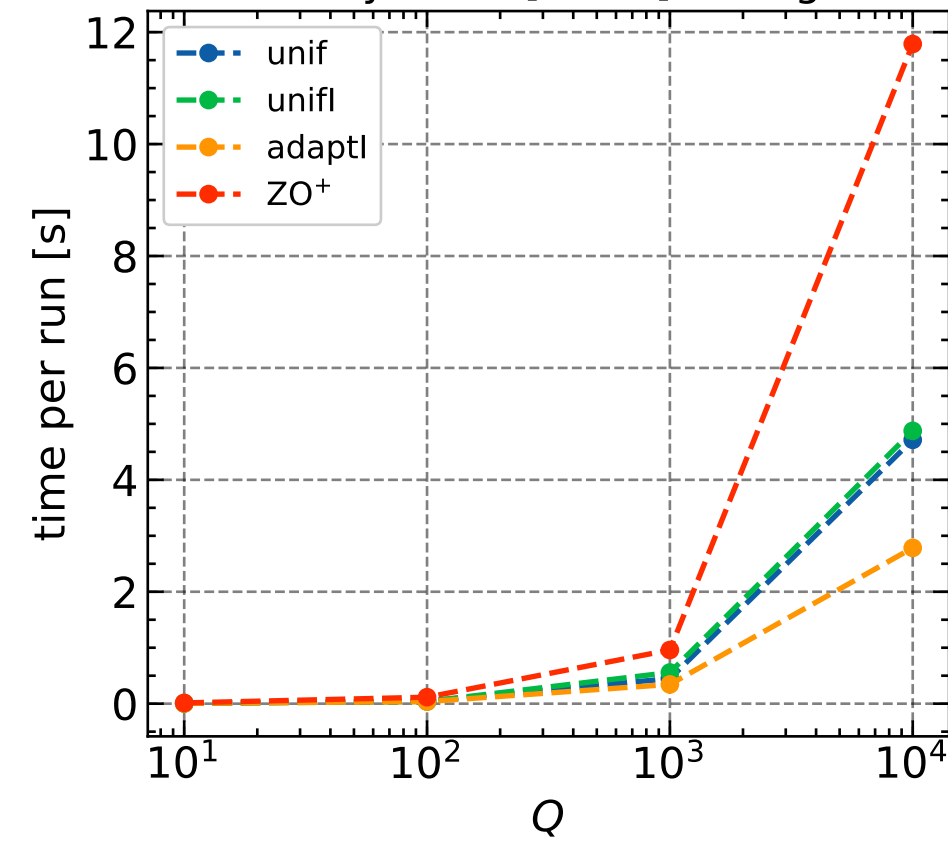

Supplement: supplementary_material [file attachment]

1834, LIME

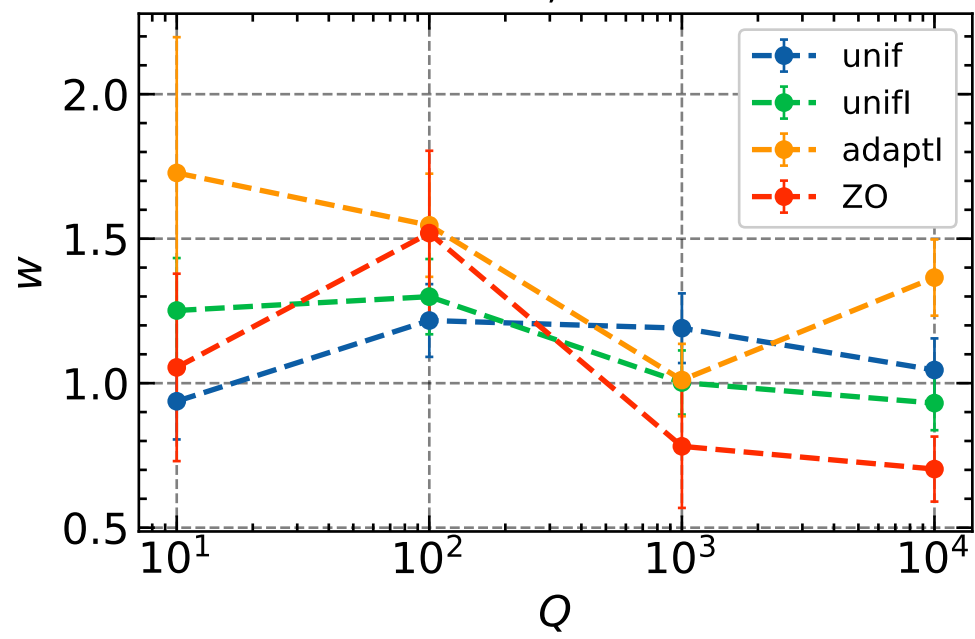

1834, SHAP

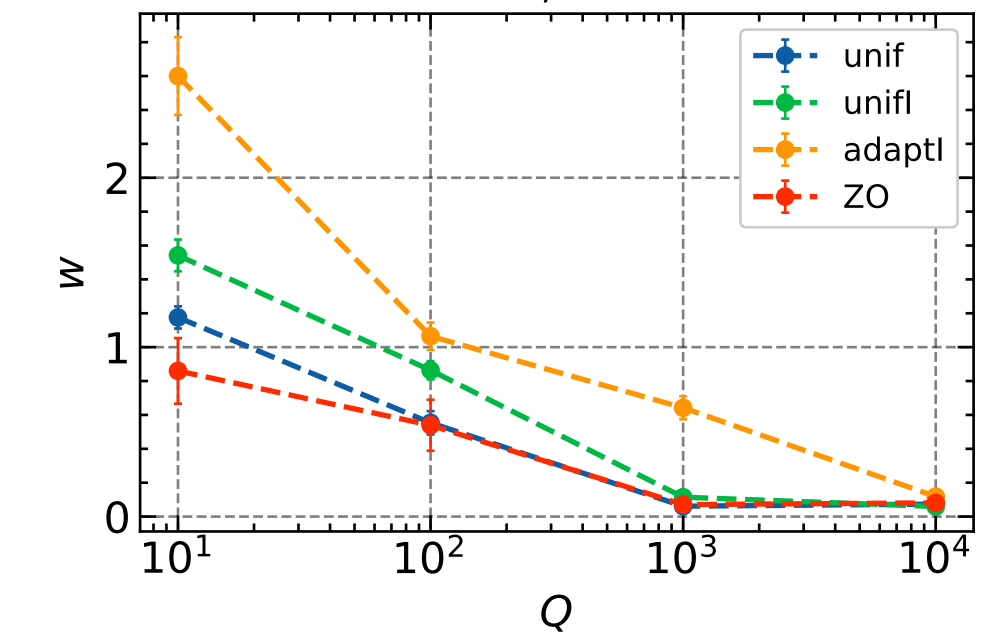

103, LIME

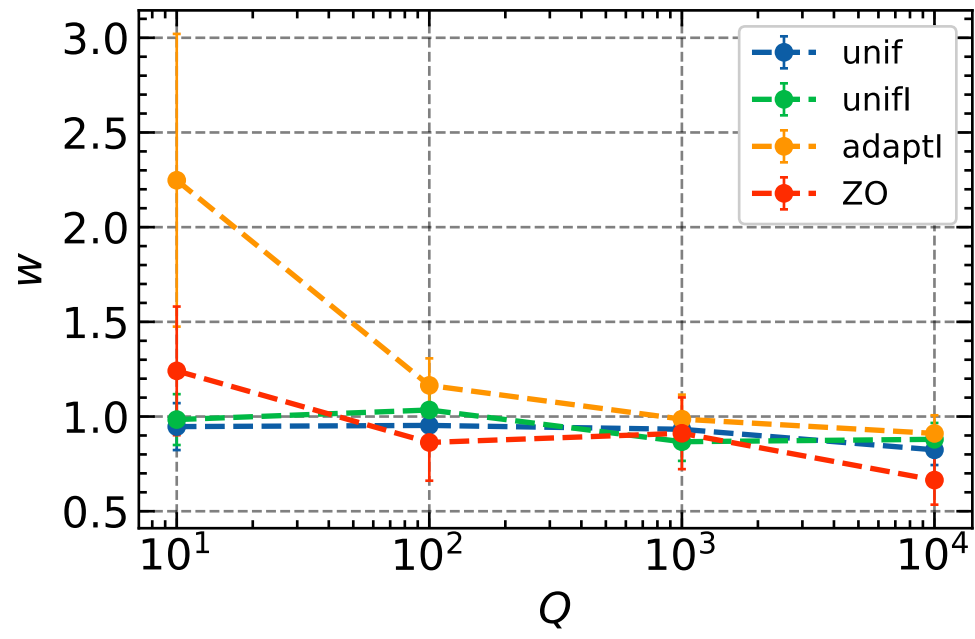

103, SHAP

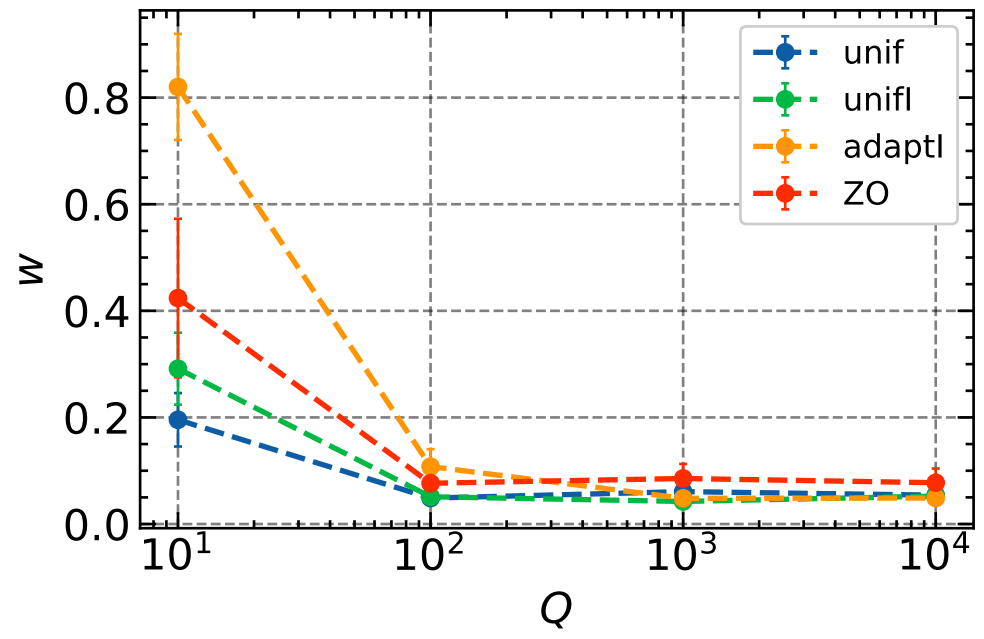

1009, LIME

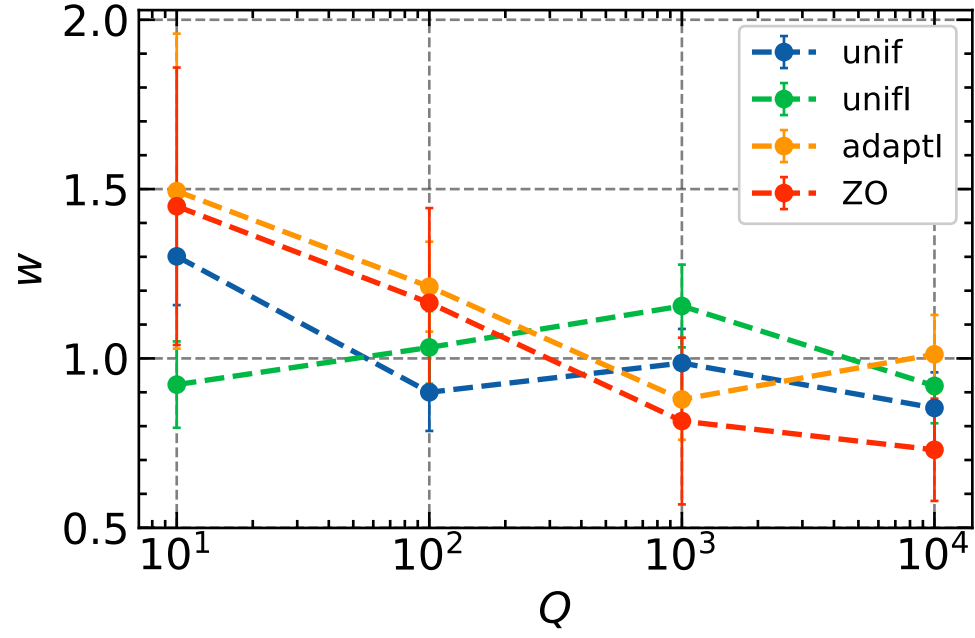

1009, SHAP

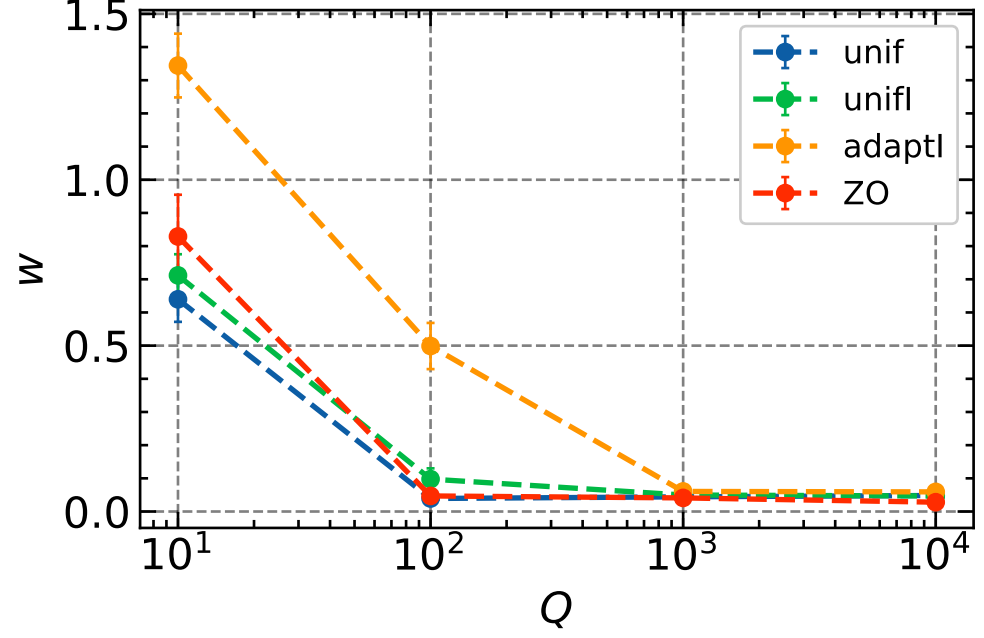

1449, LIME

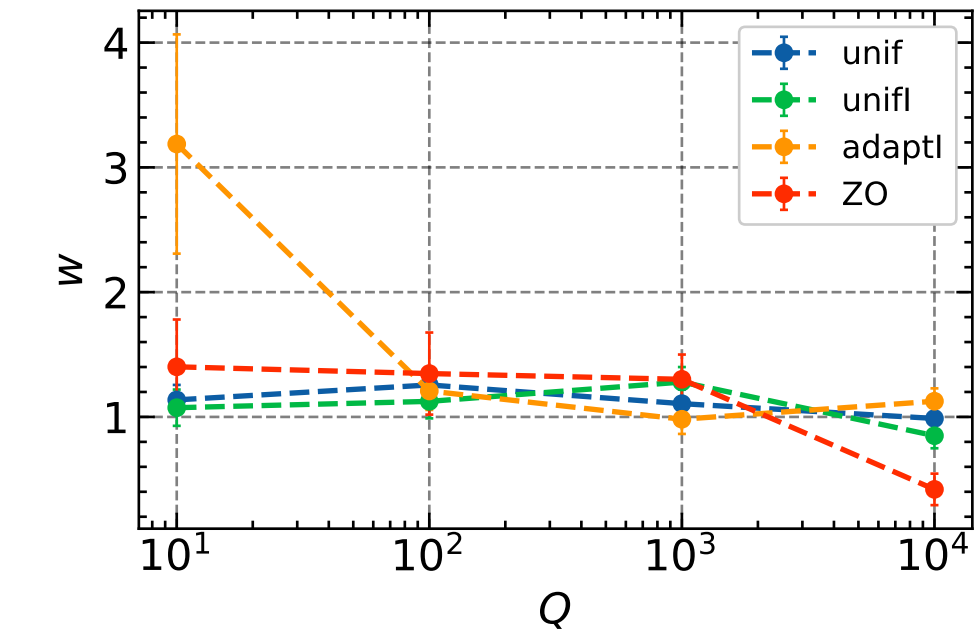

1449, SHAP

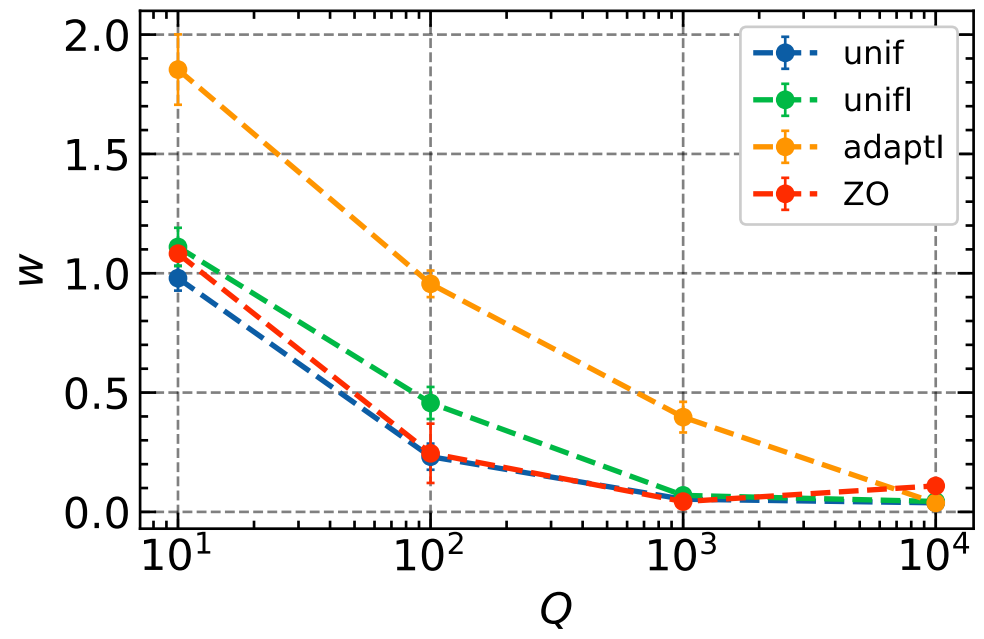

520, LIME

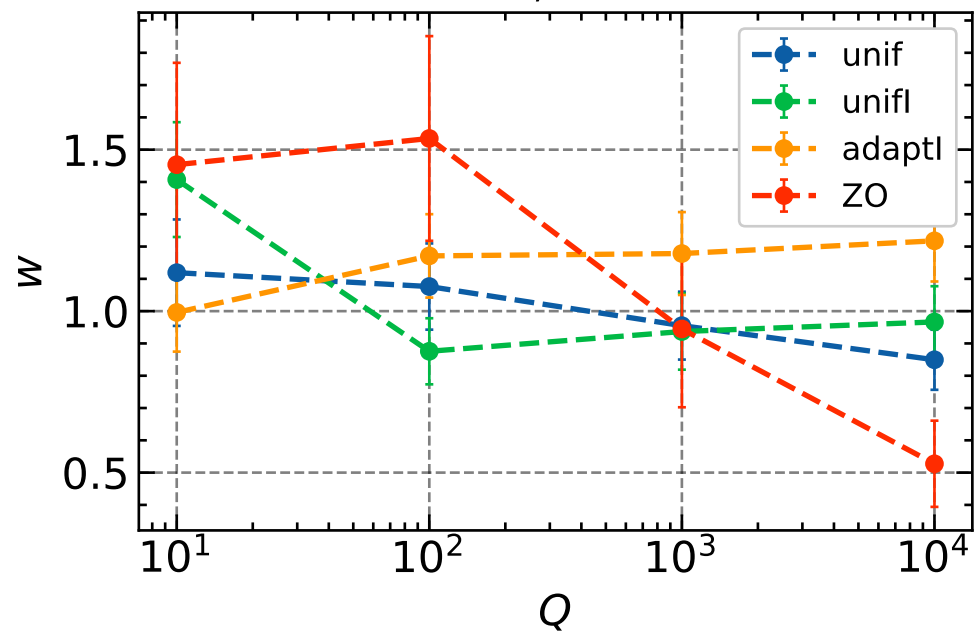

520, SHAP

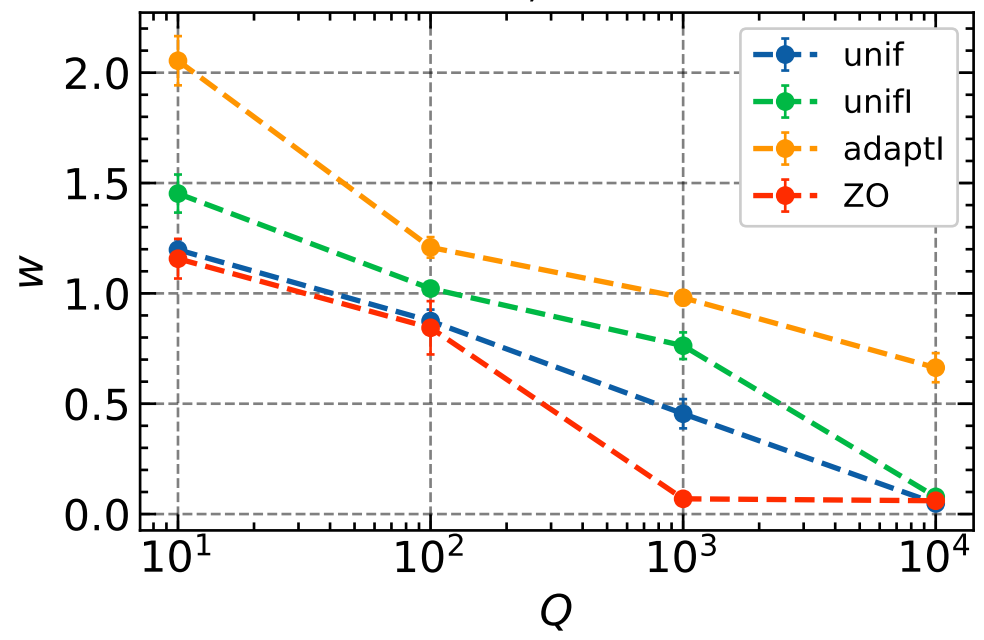

Supplement: supplementary_material [file attachment]

arrhythmia [LIME] w

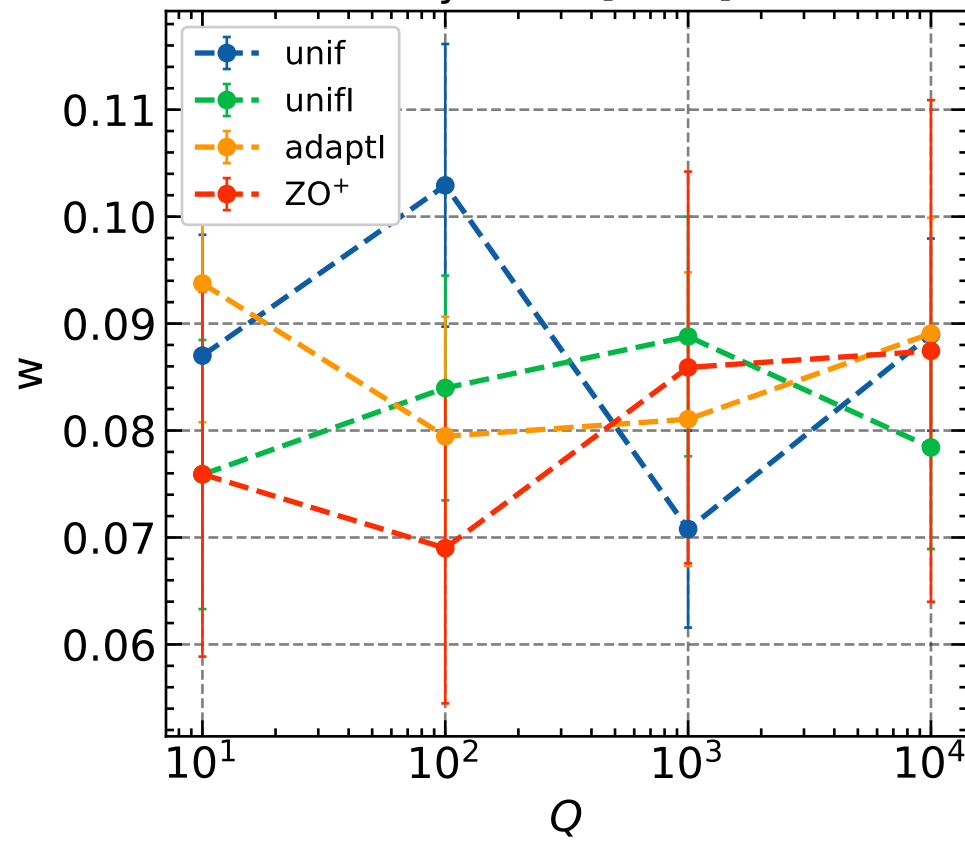

arrhythmia [LIME] timing

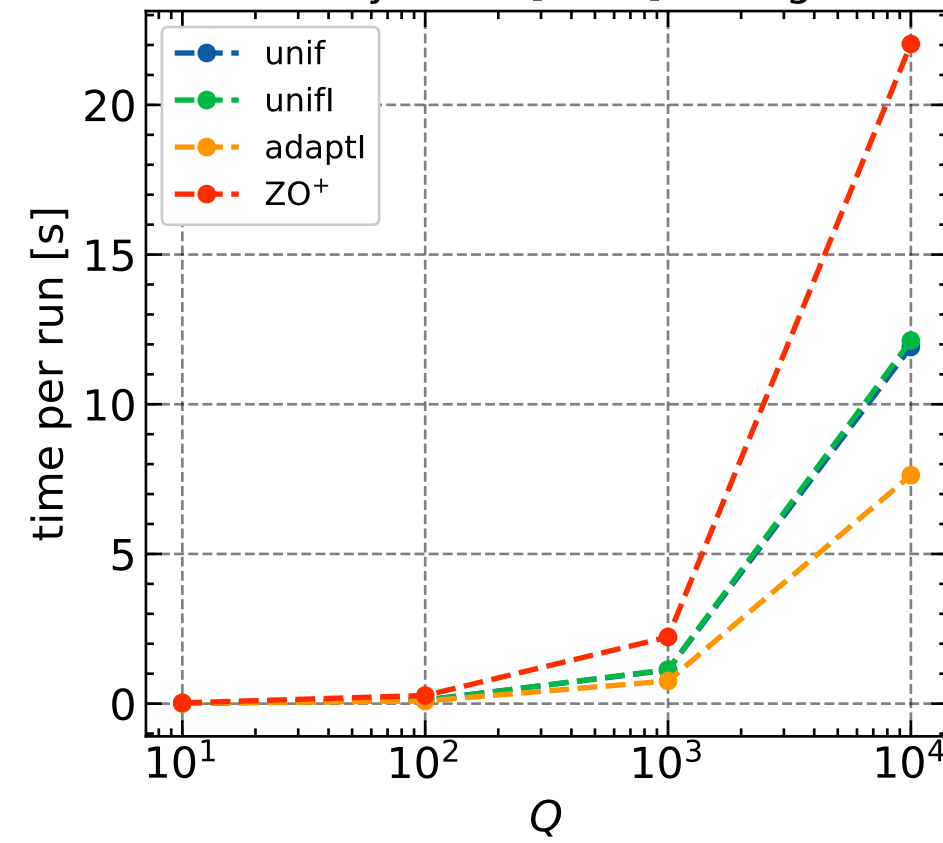

arrhythmia [SHAP] w

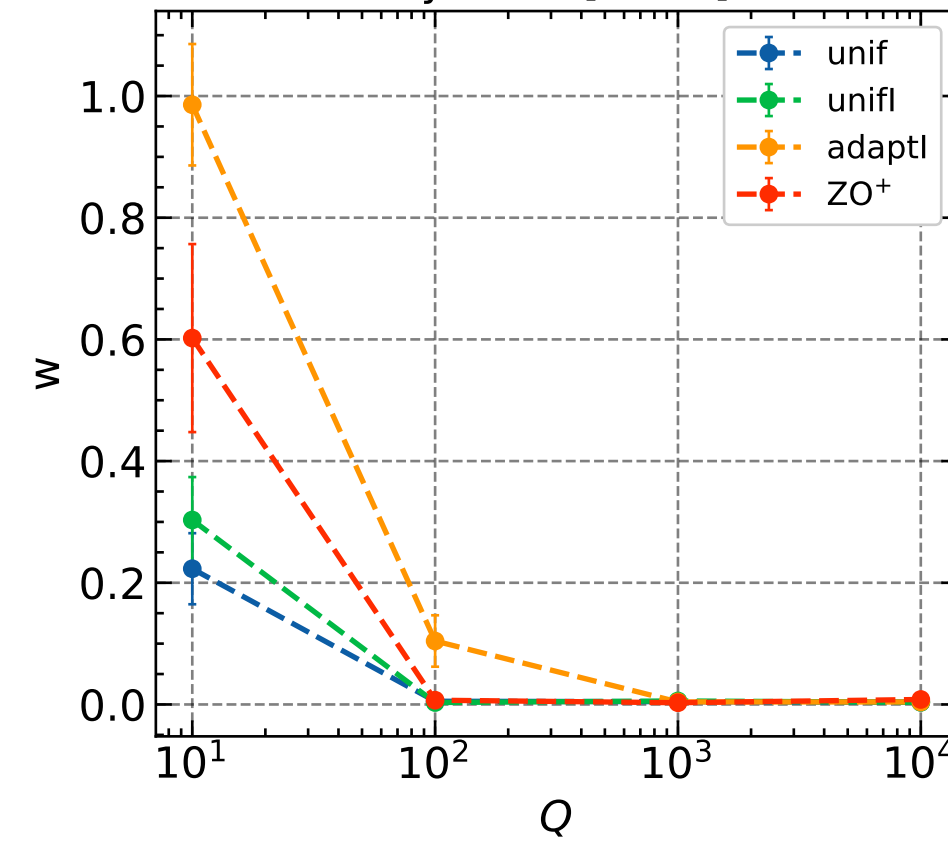

arrhythmia [SHAP] timing

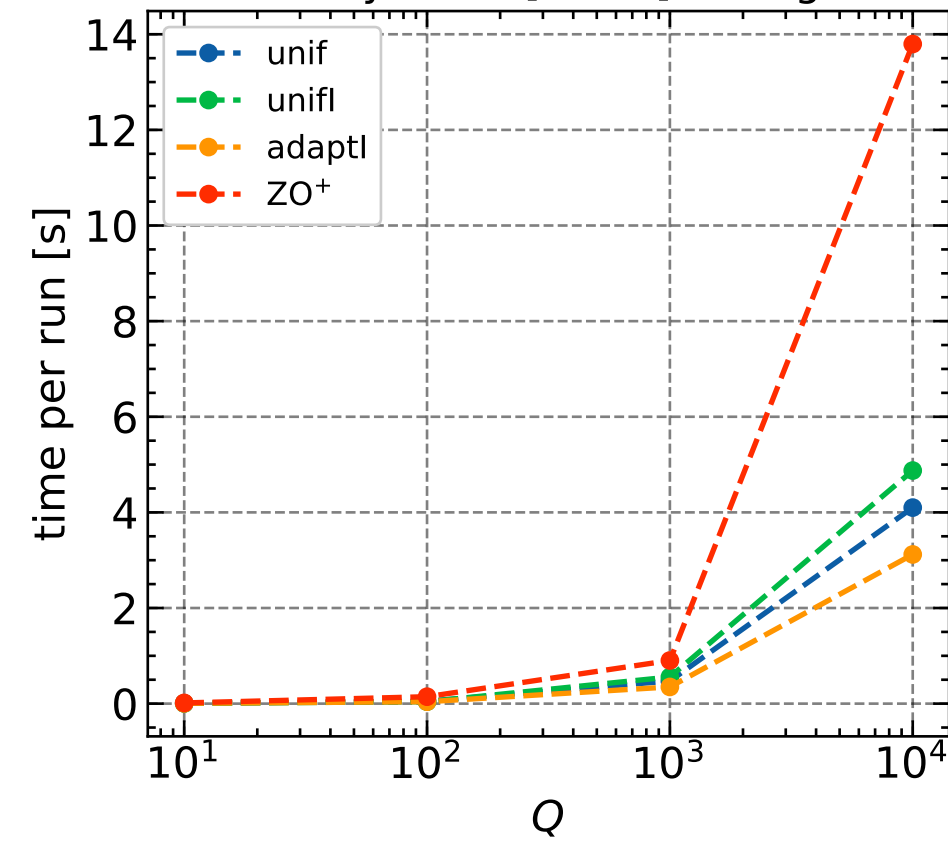

Supplement: supplementary_material [file attachment]

249, LIME

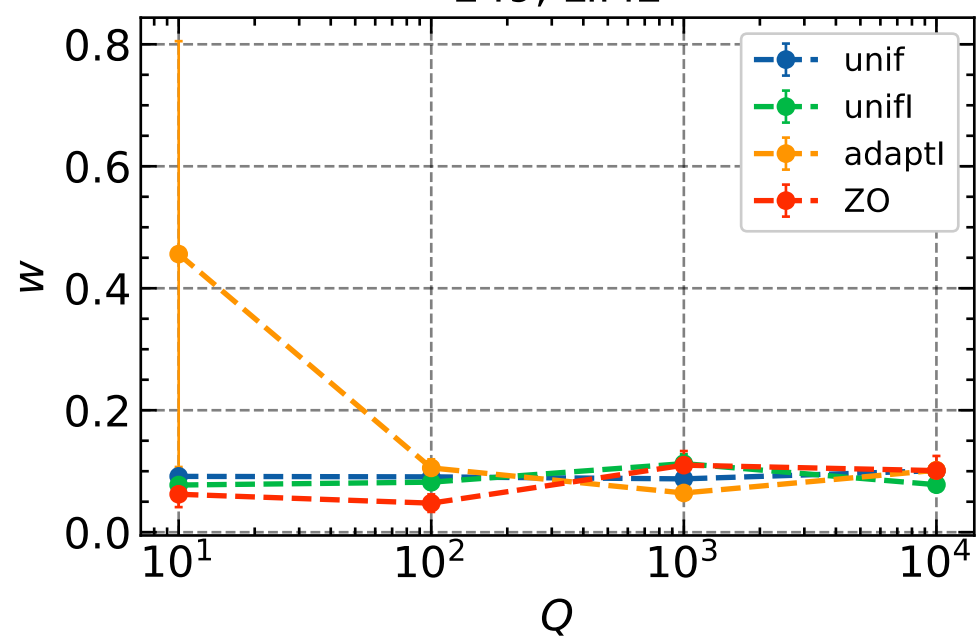

249, SHAP

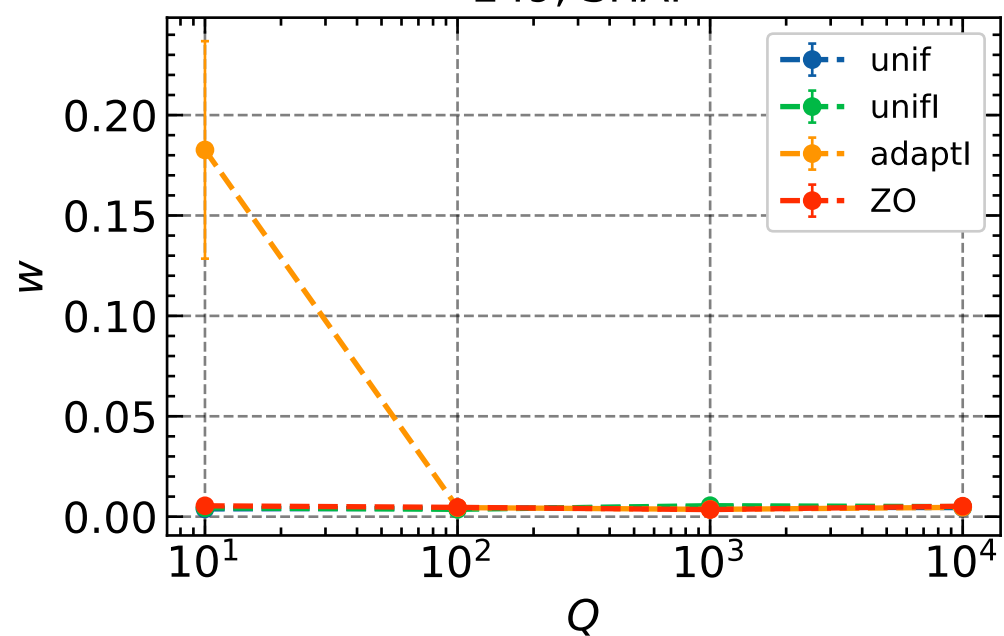

287, LIME

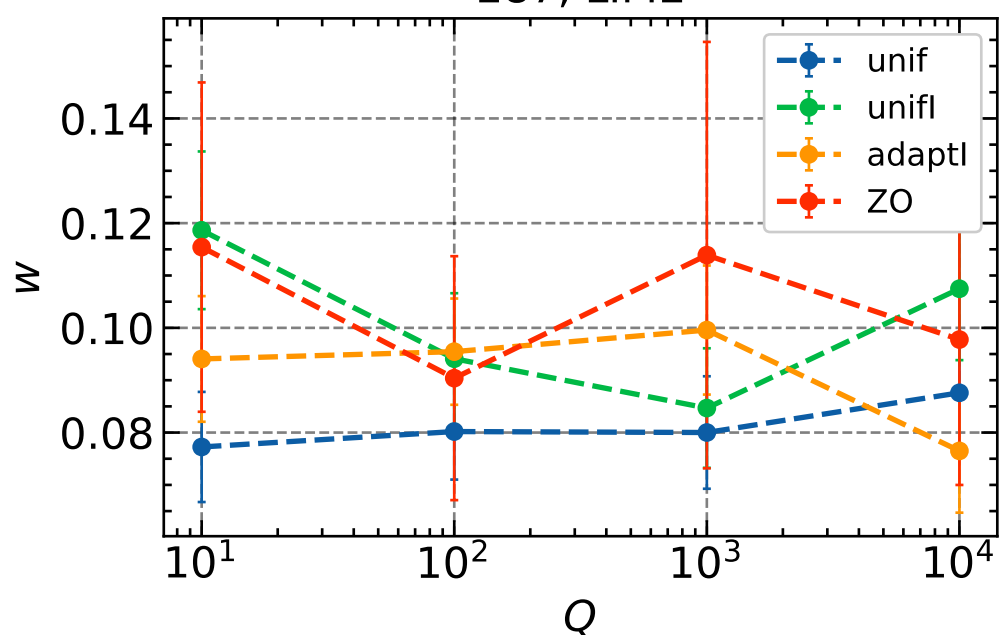

287, SHAP

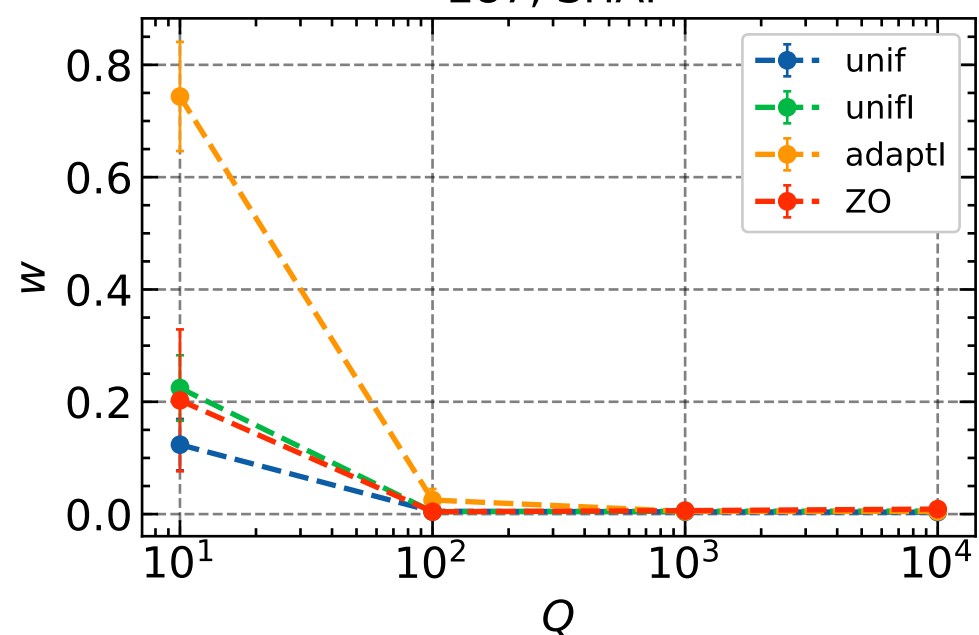

158, LIME

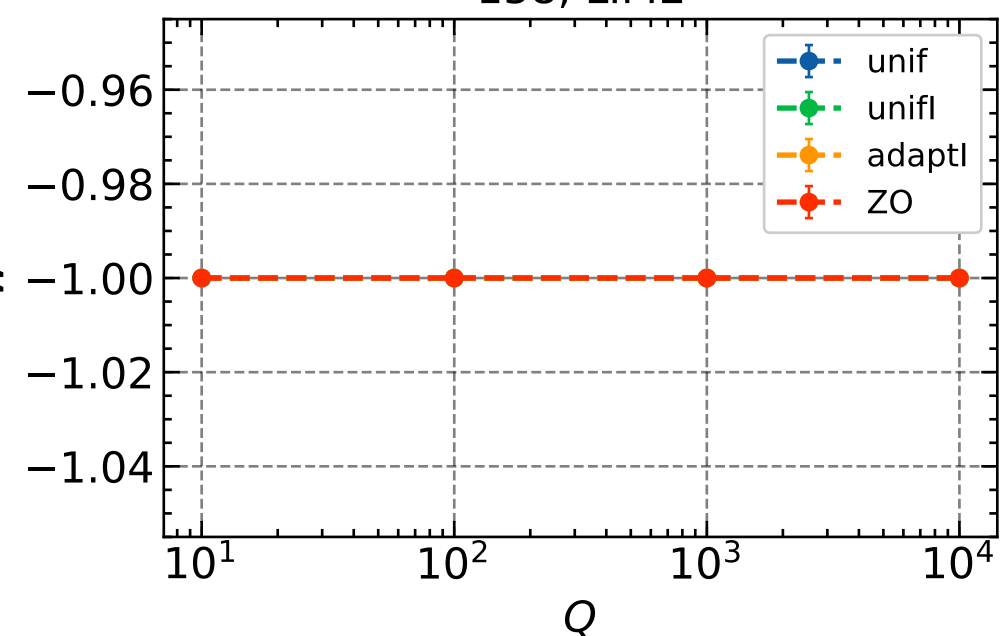

158, SHAP

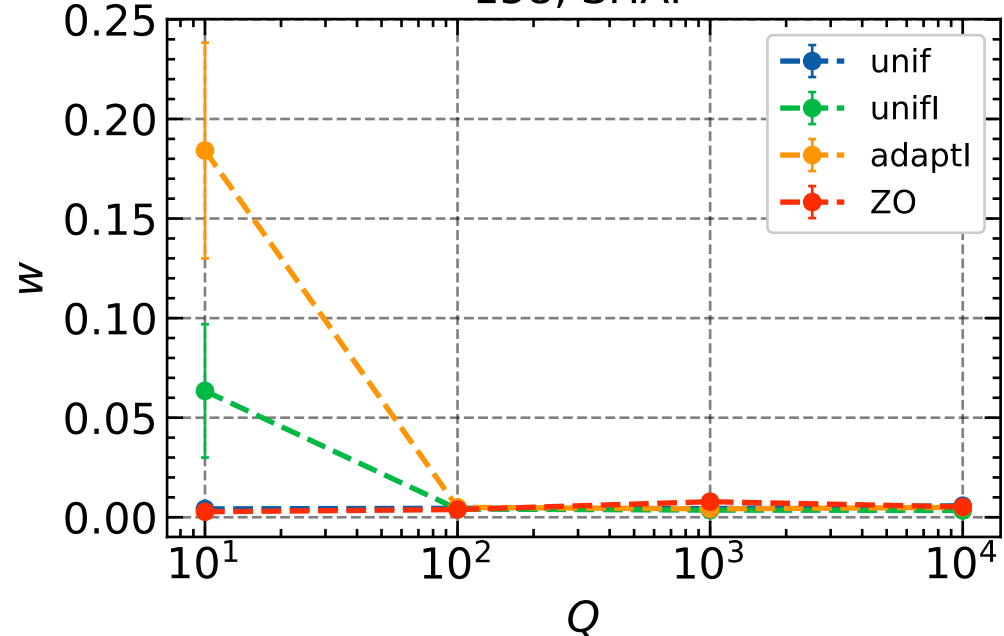

269, LIME

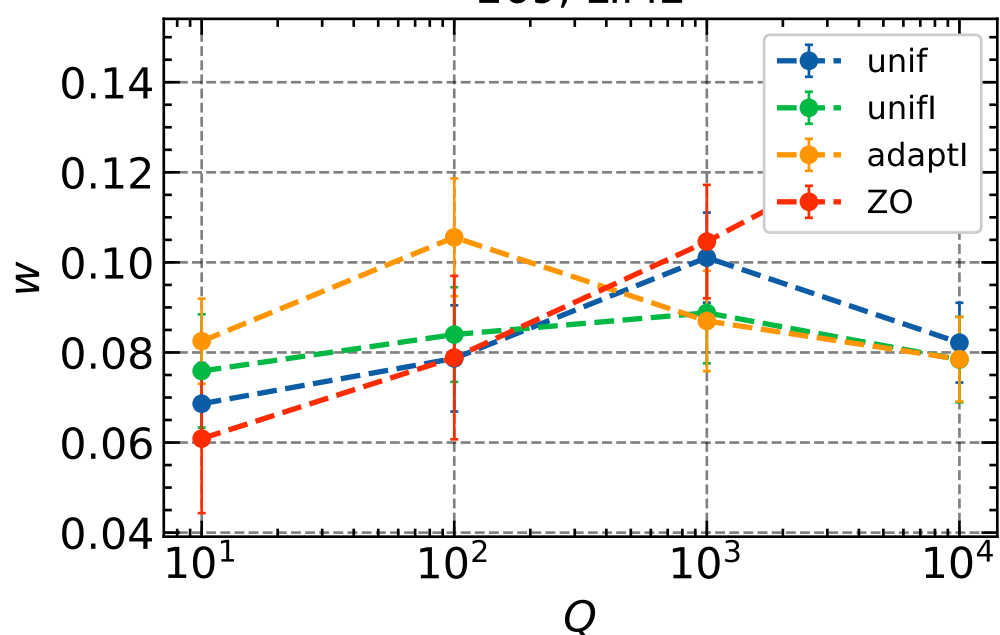

269, SHAP

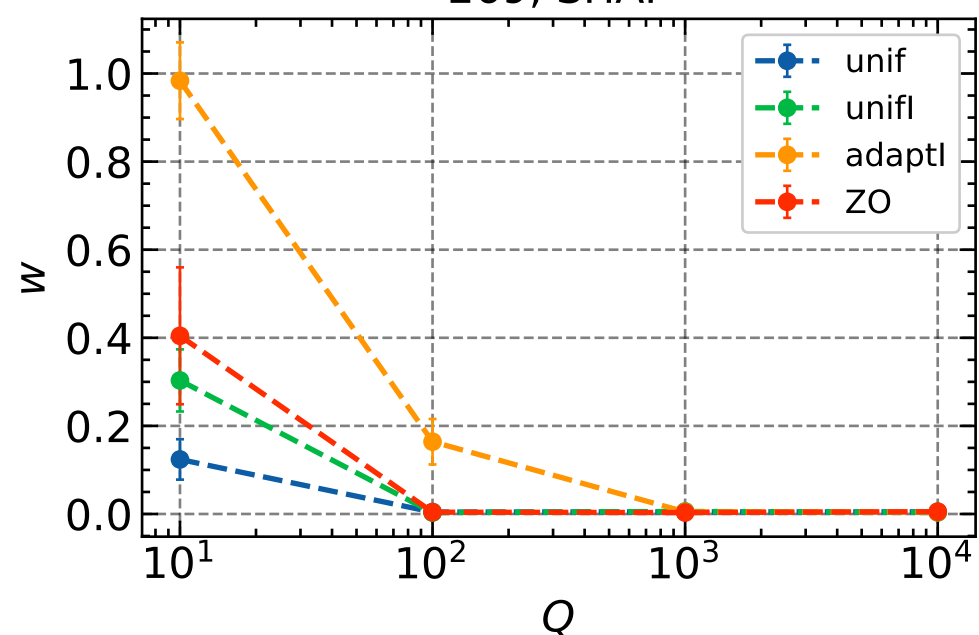

257, LIME

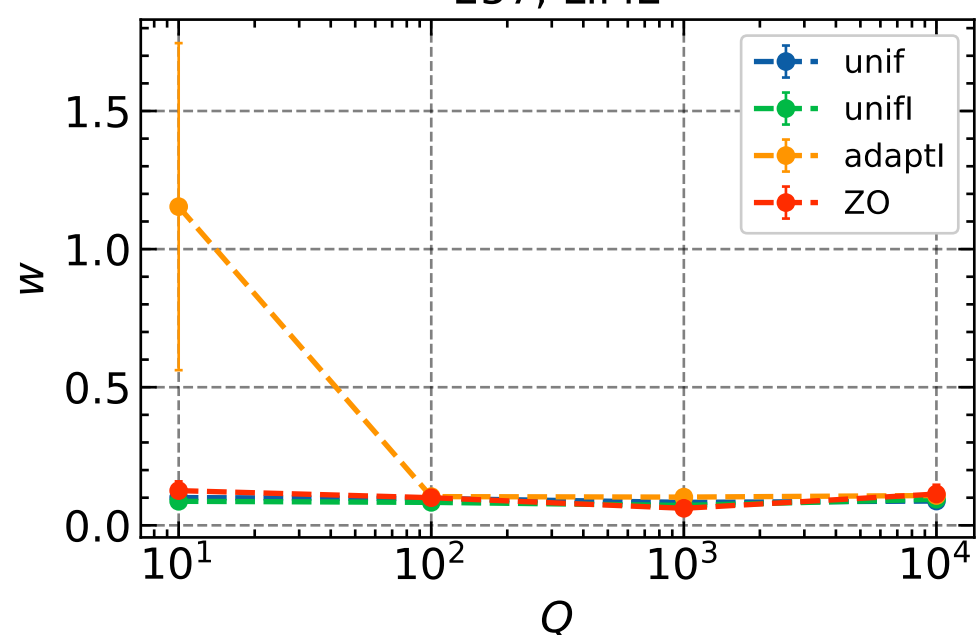

257, SHAP

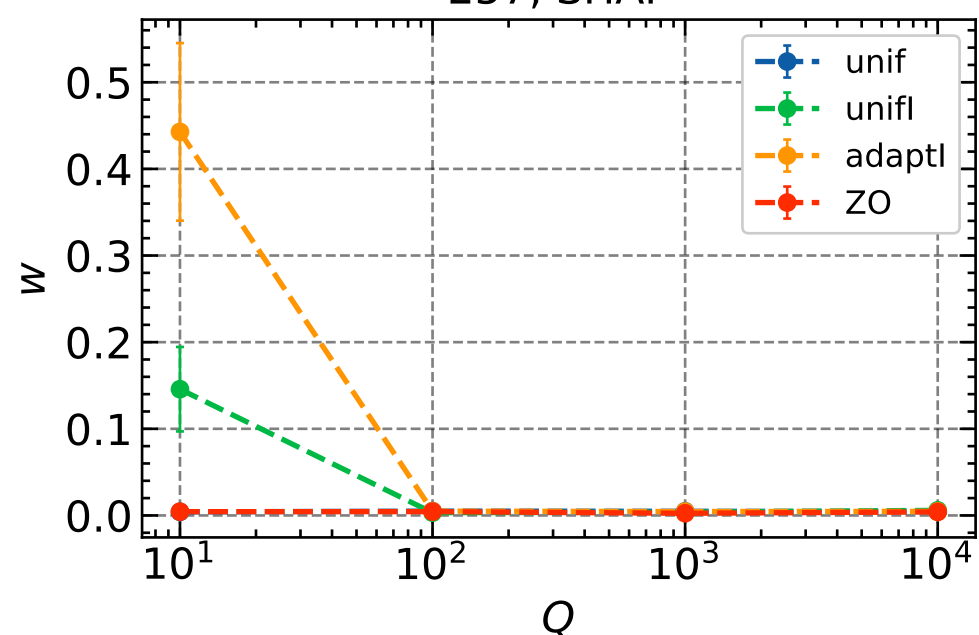

Supplement: supplementary_material [file attachment]

who dataset -- LinearRegression()

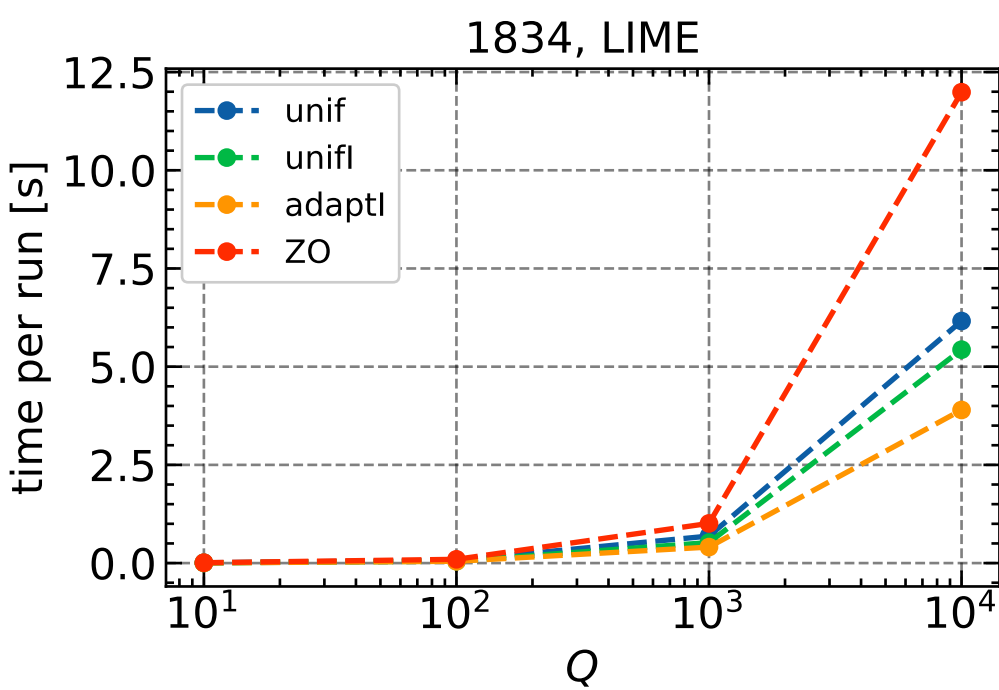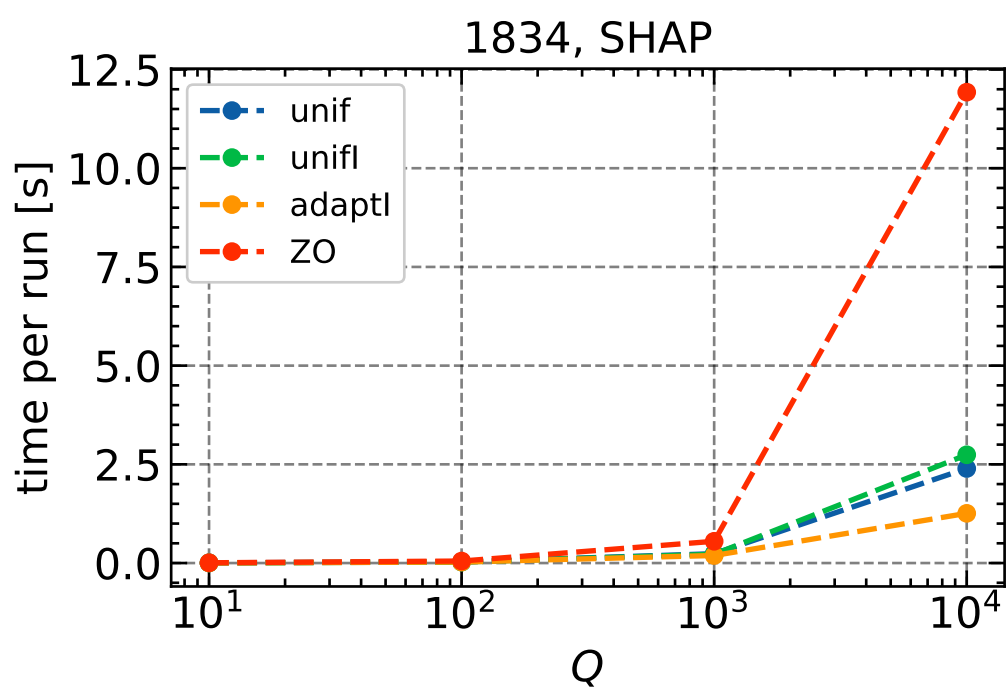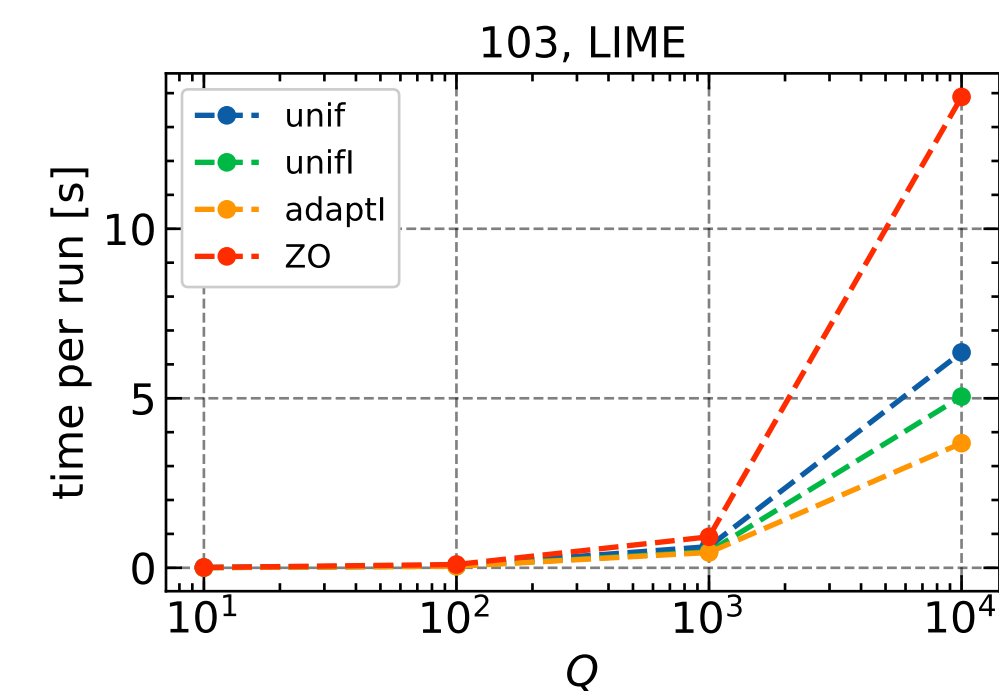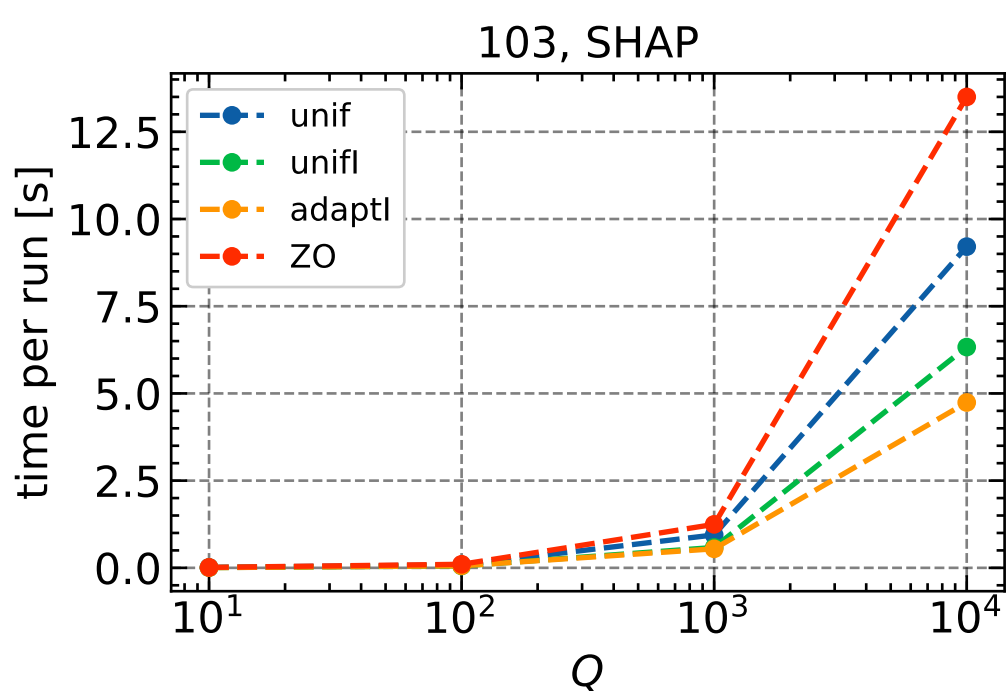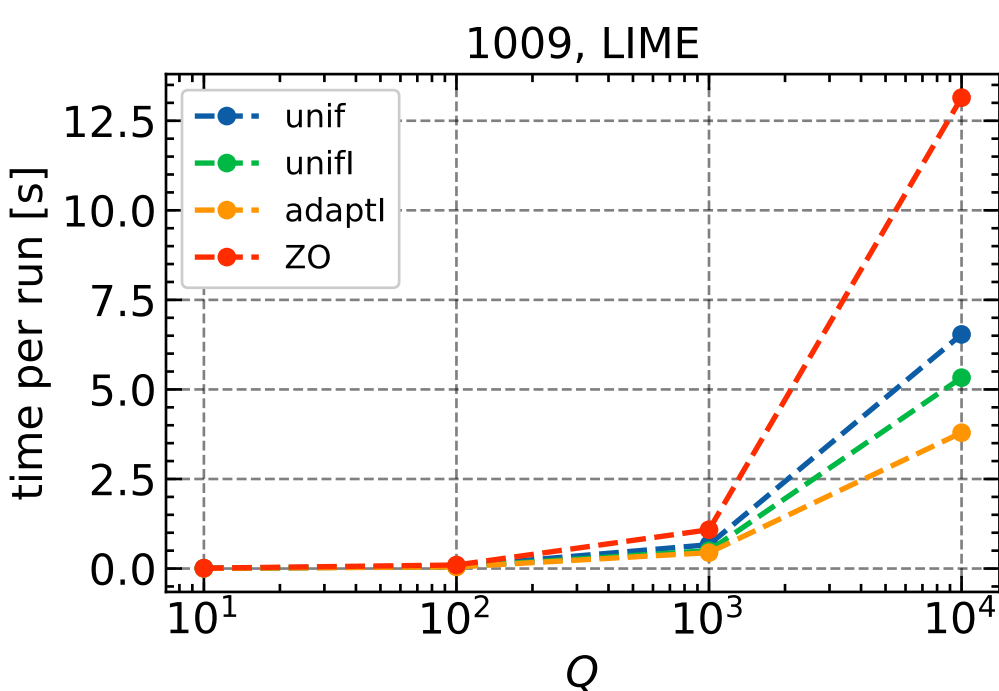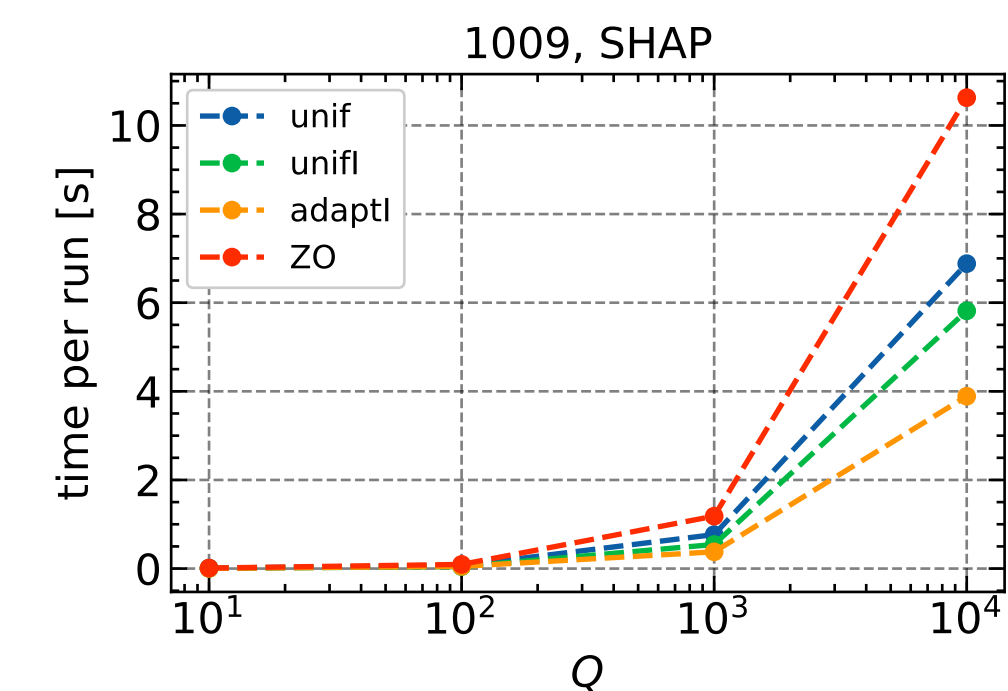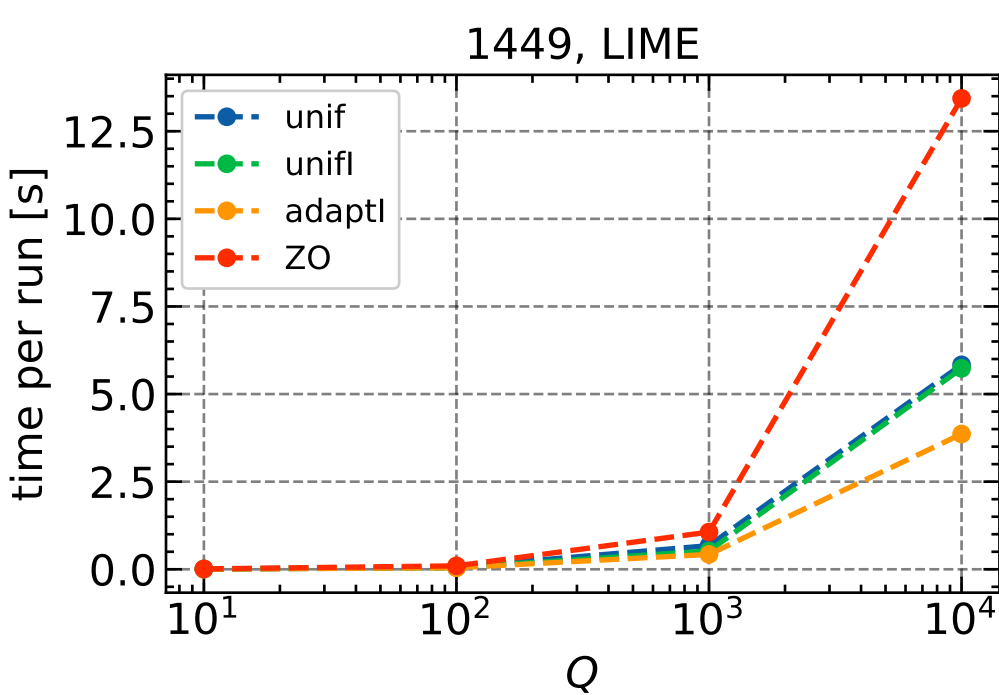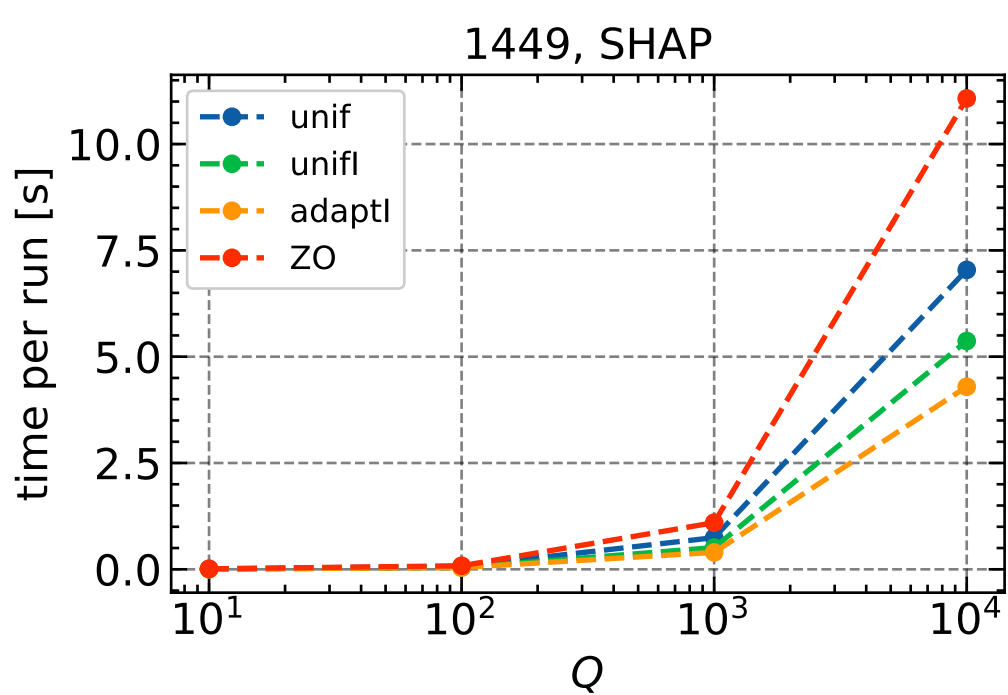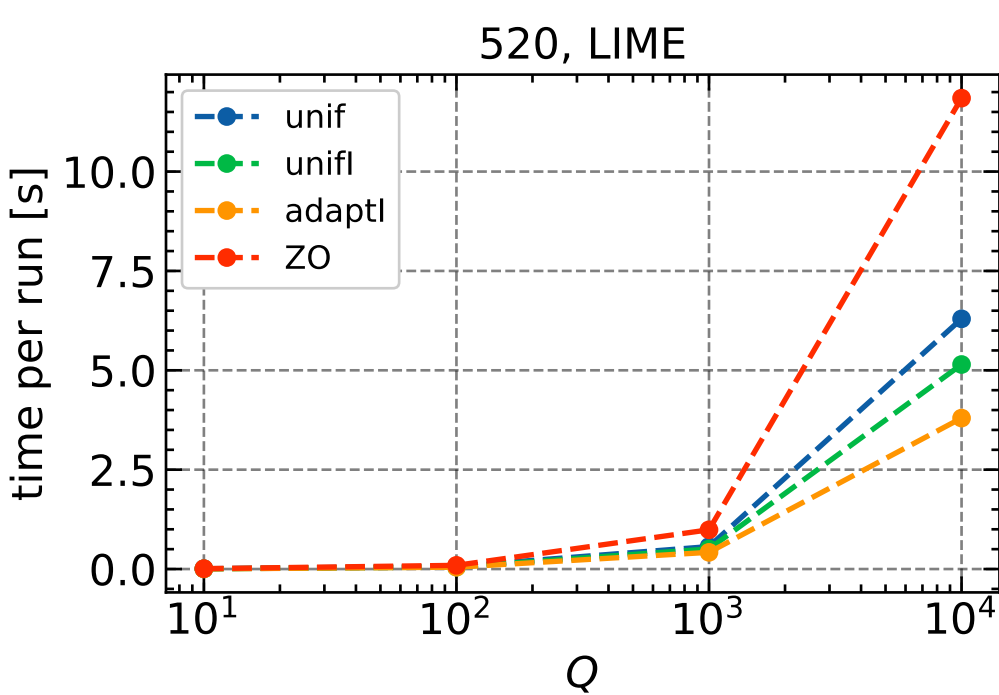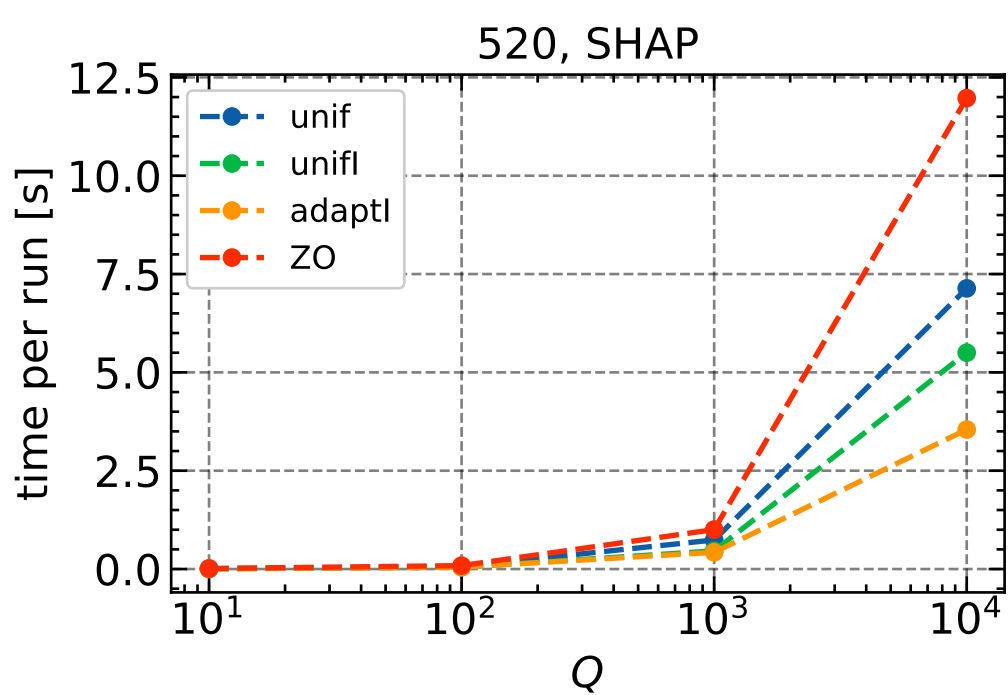

Supplement: supplementary_material [file attachment]

arrhythmia [LIME] w

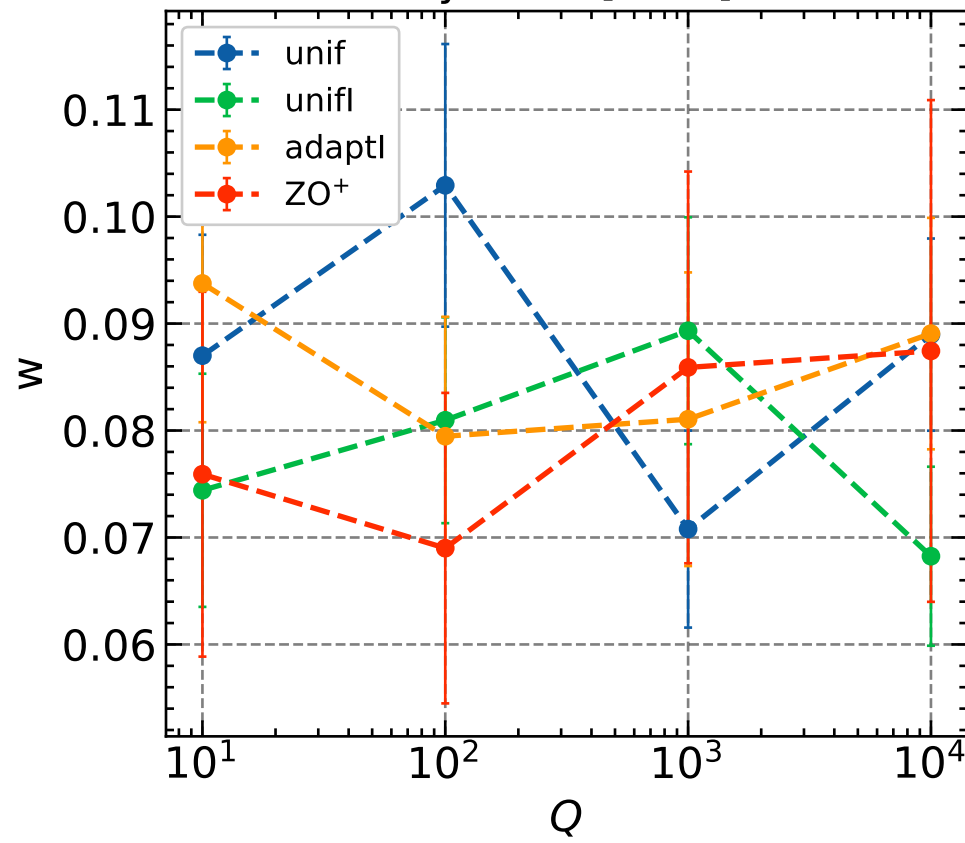

arrhythmia [LIME] timing

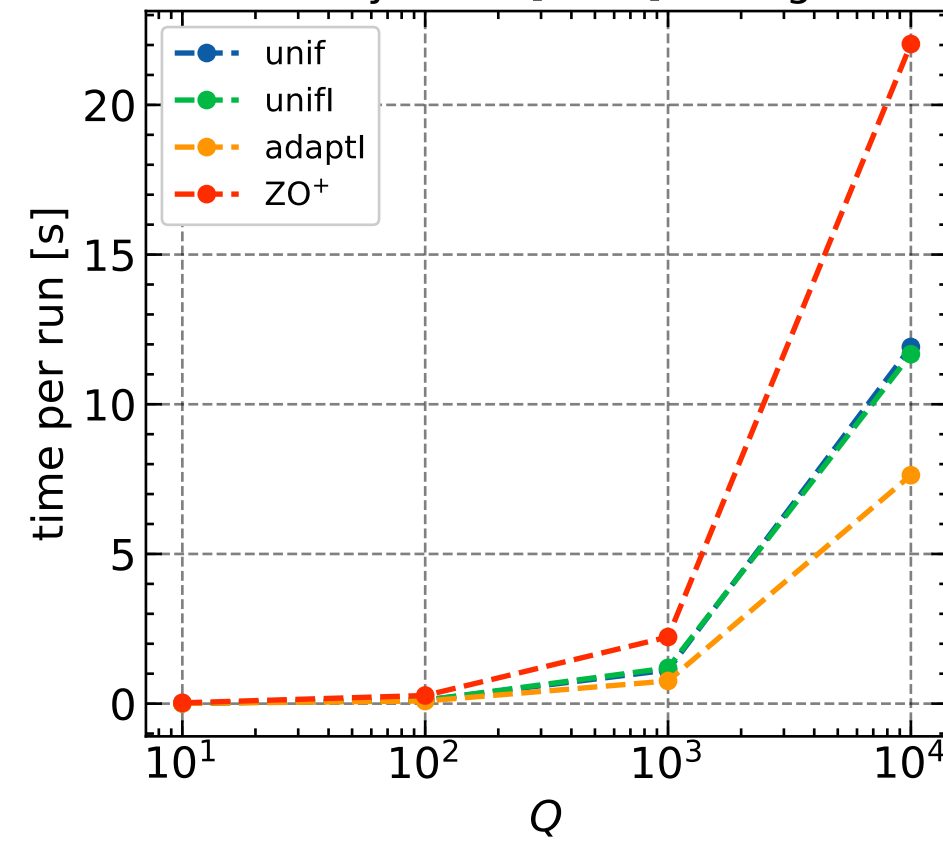

arrhythmia [SHAP] w

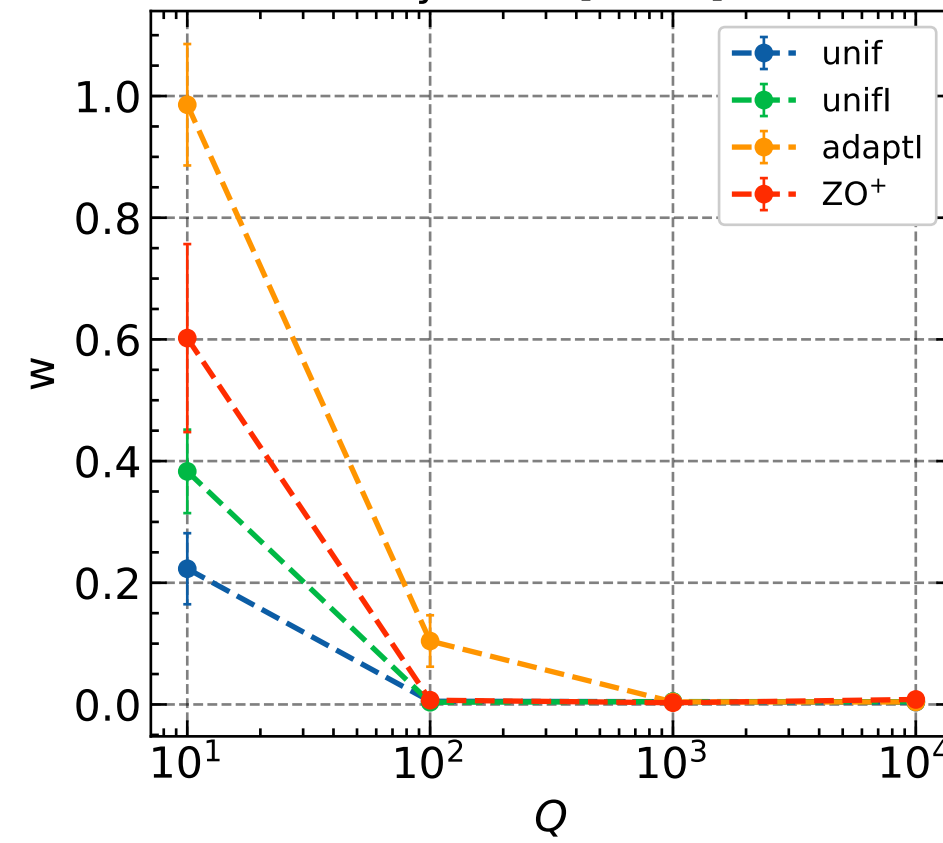

arrhythmia [SHAP] timing

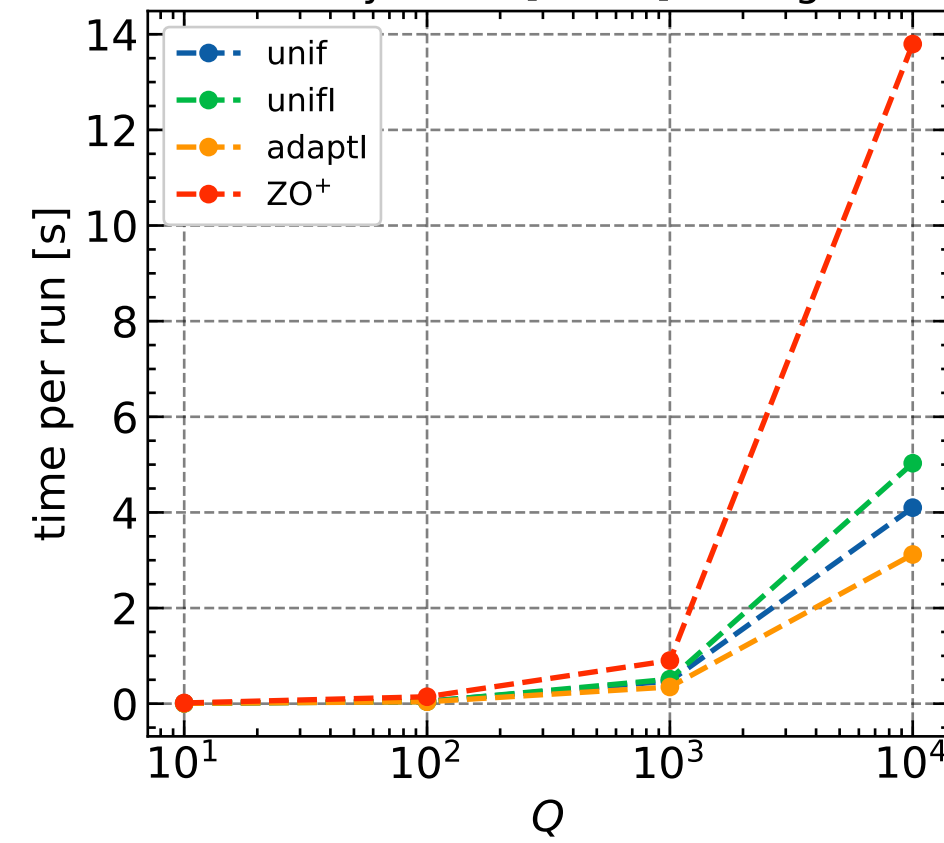

Supplement: supplementary_material [file attachment]

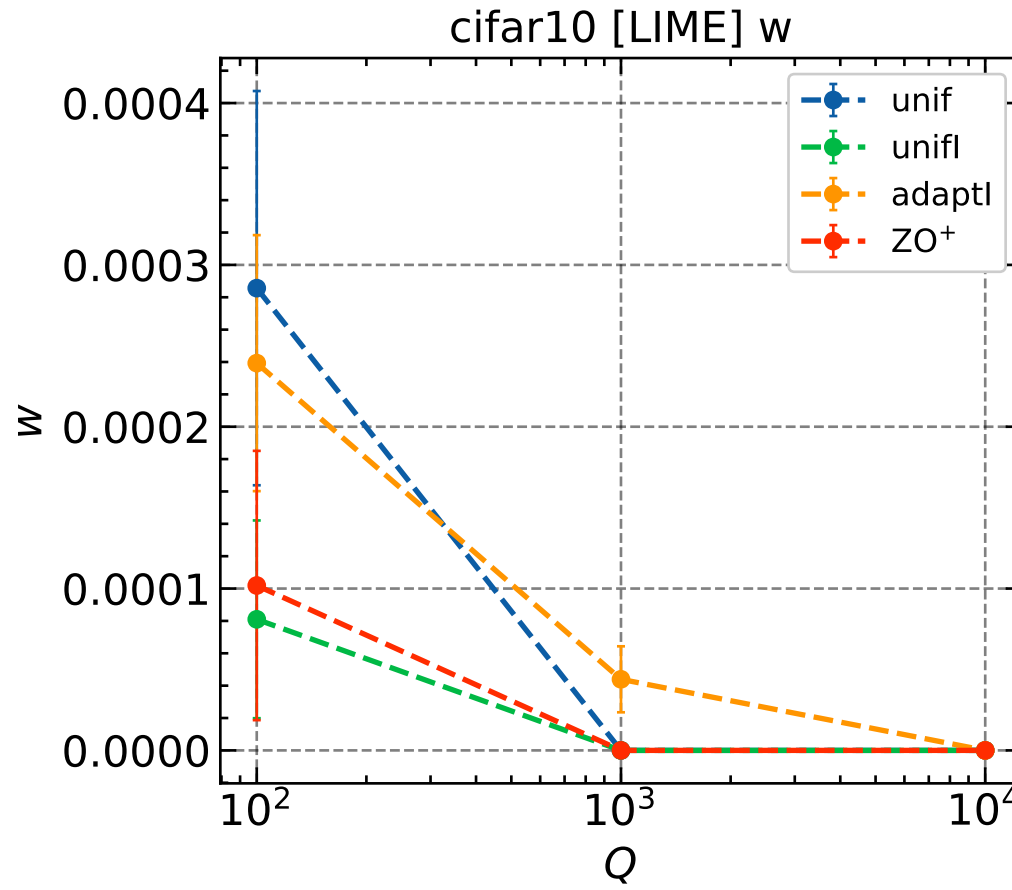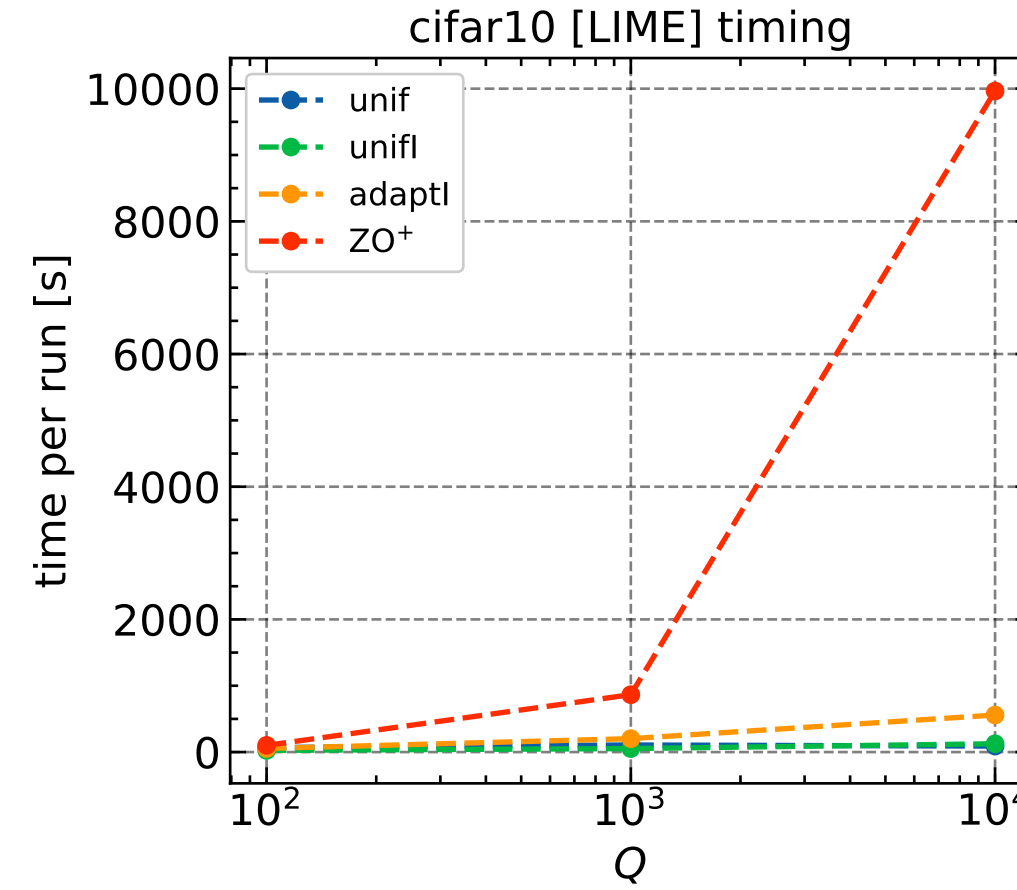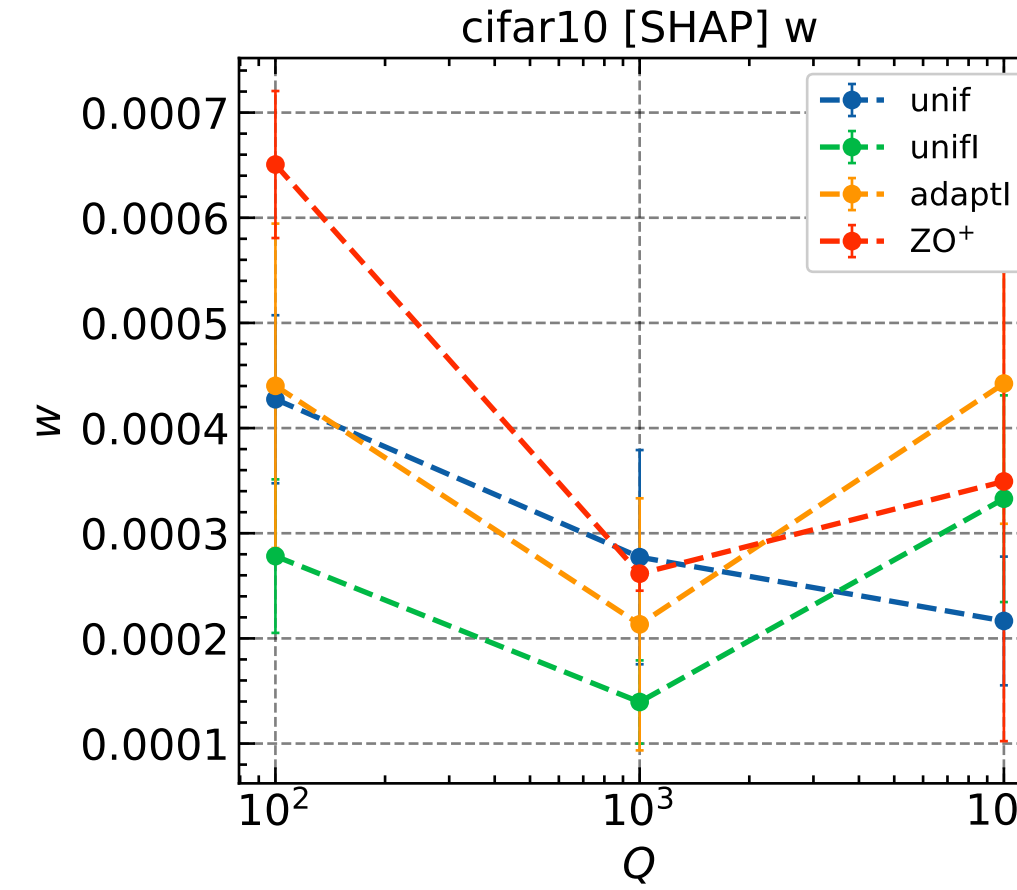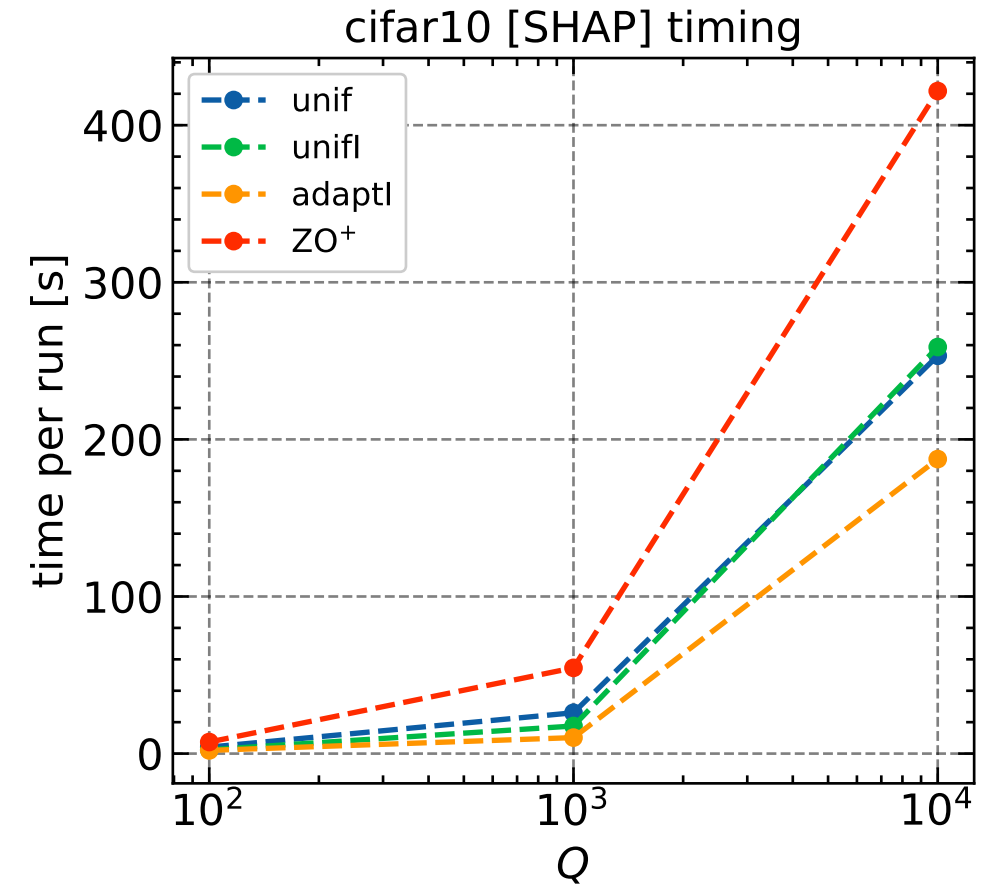

Supplement: supplementary_material [file attachment]

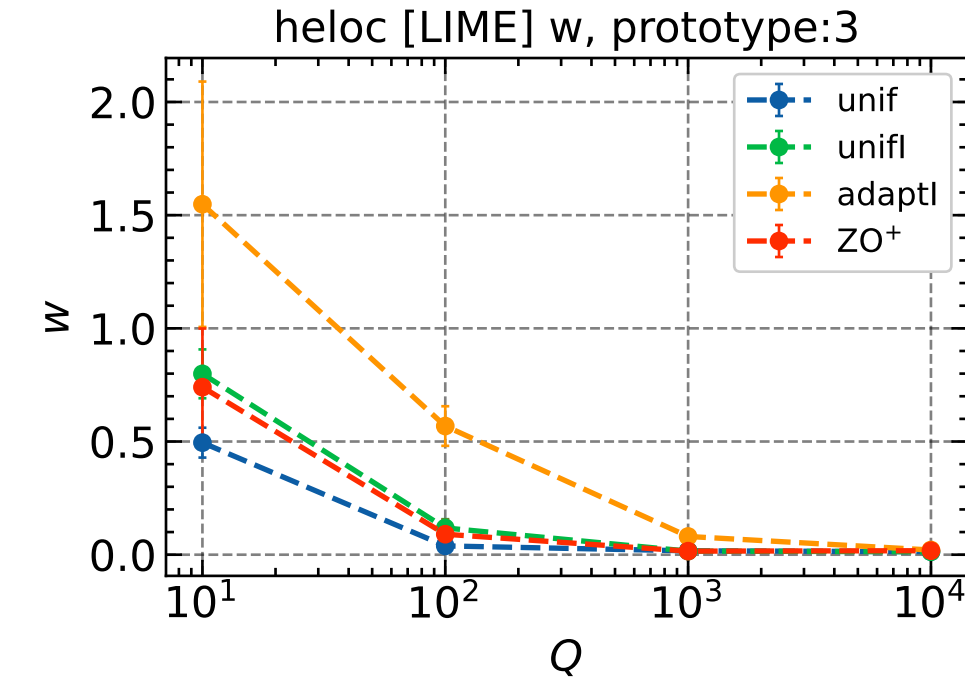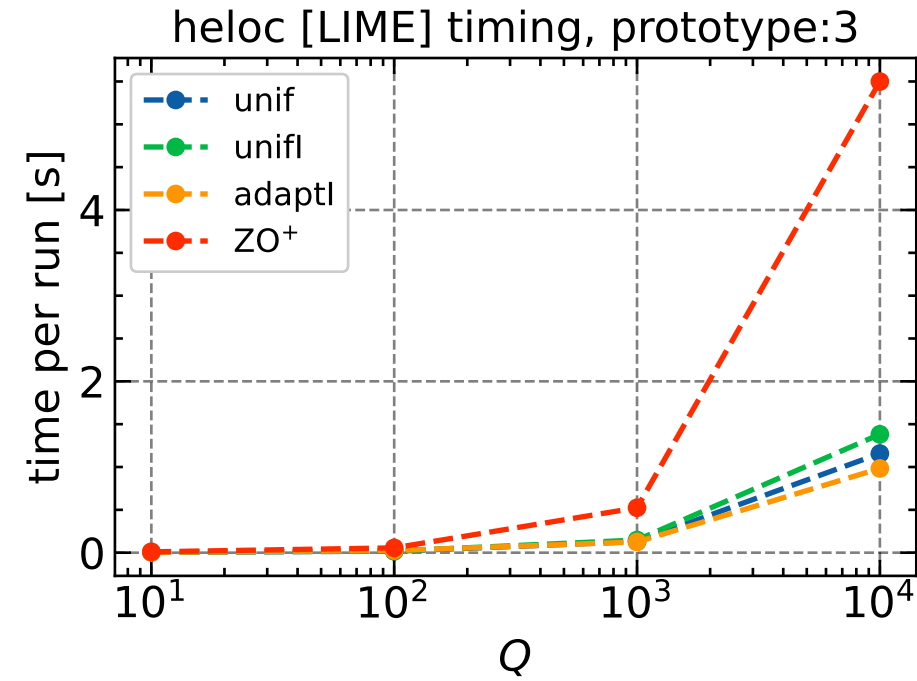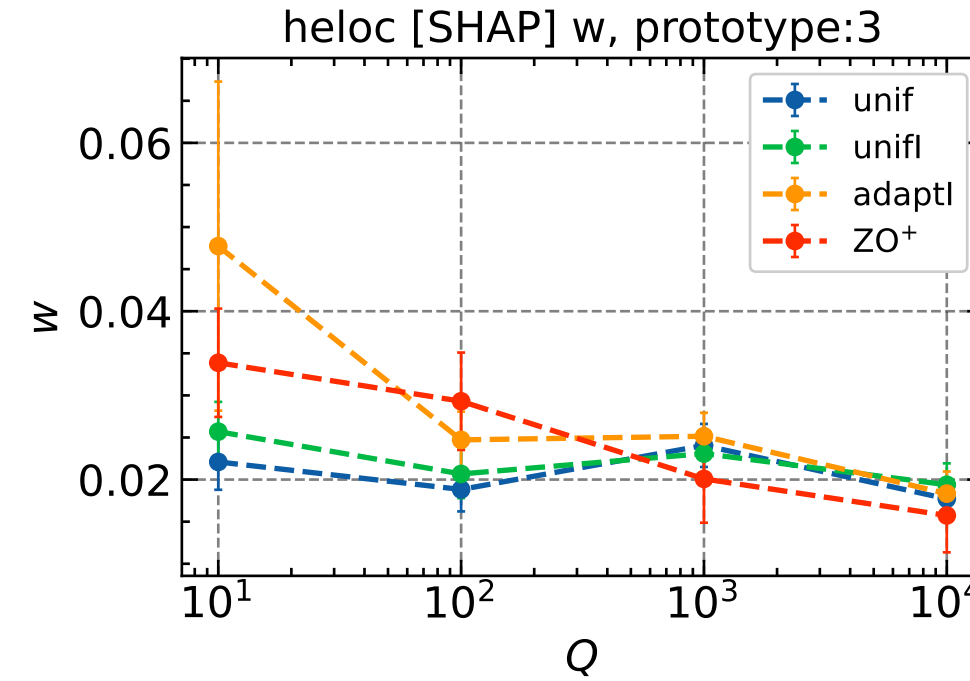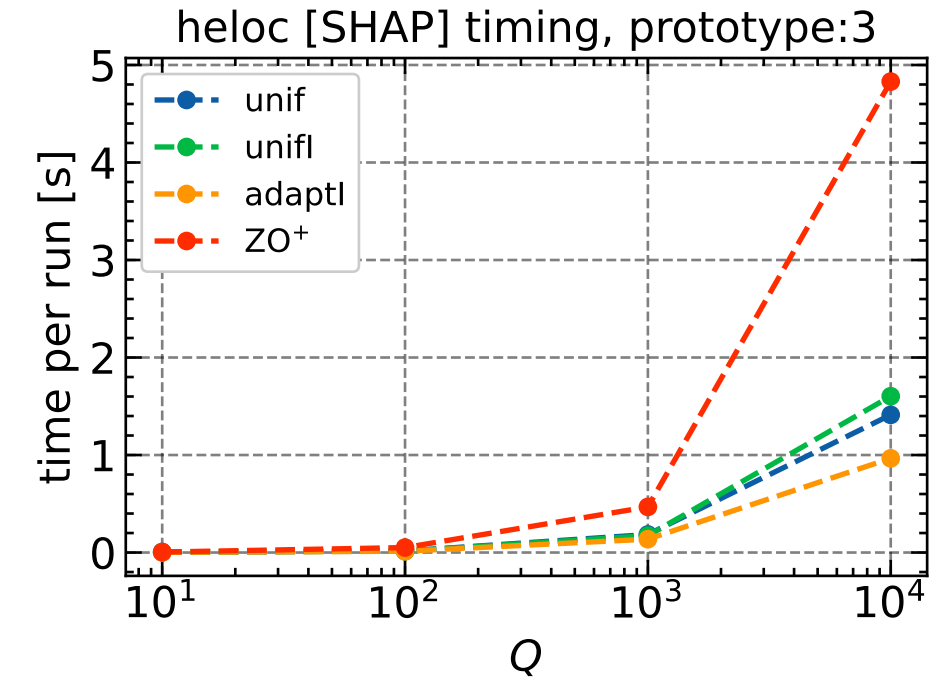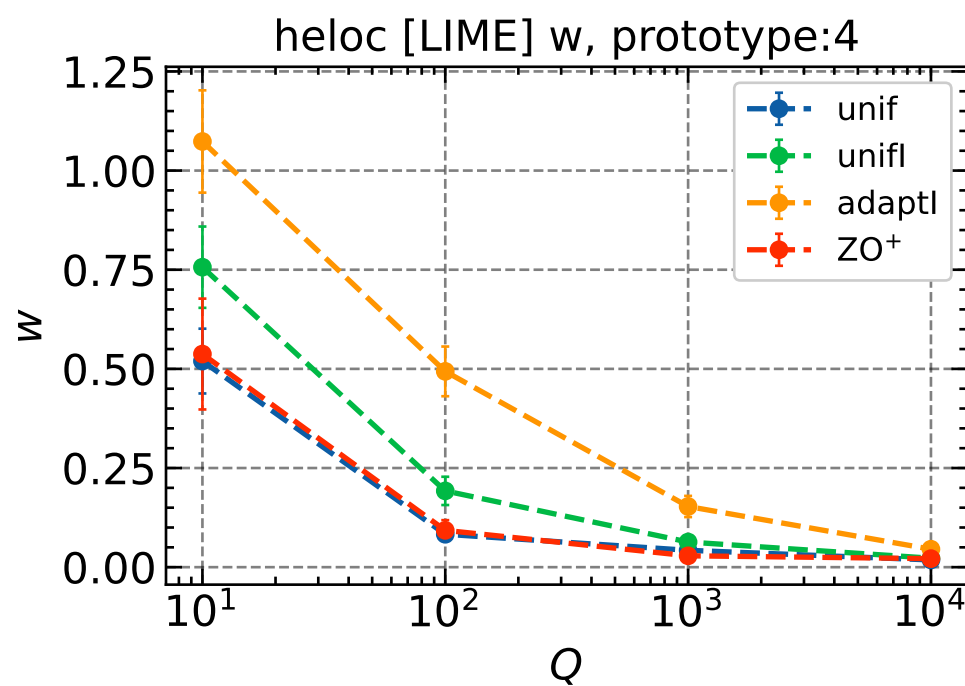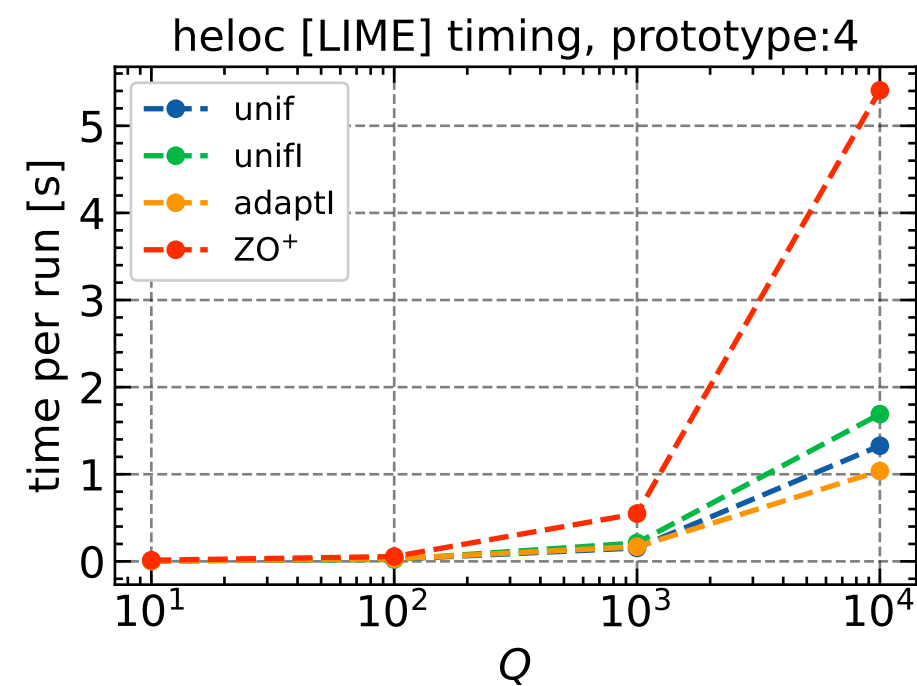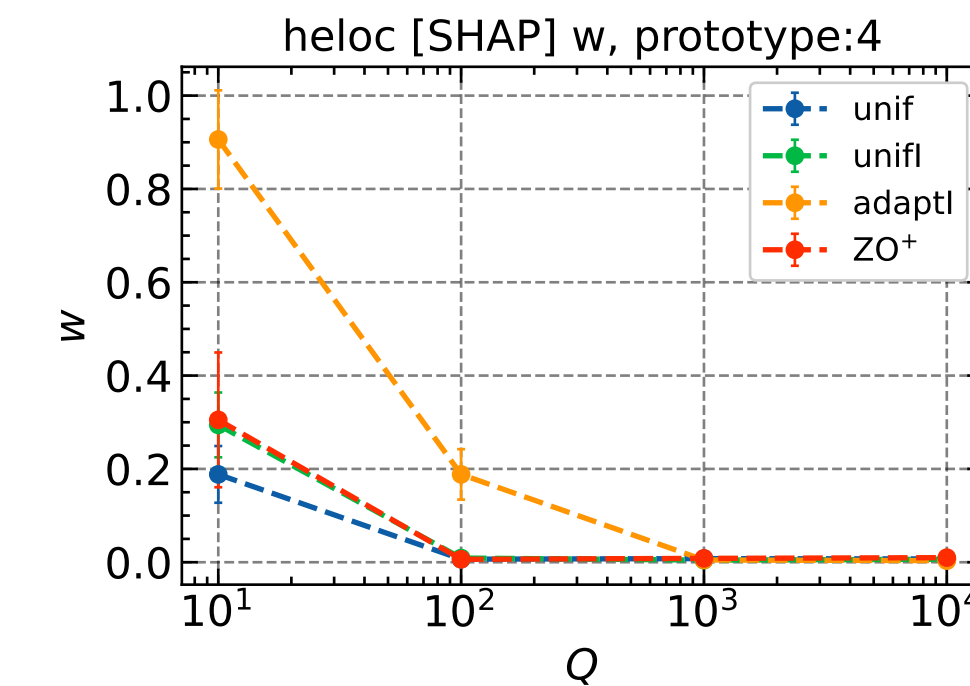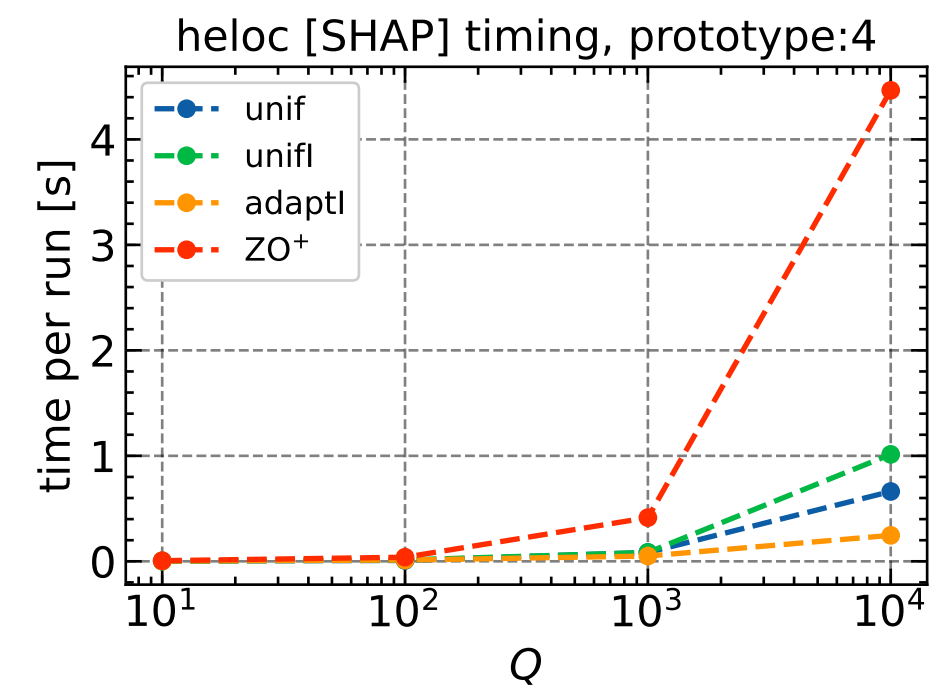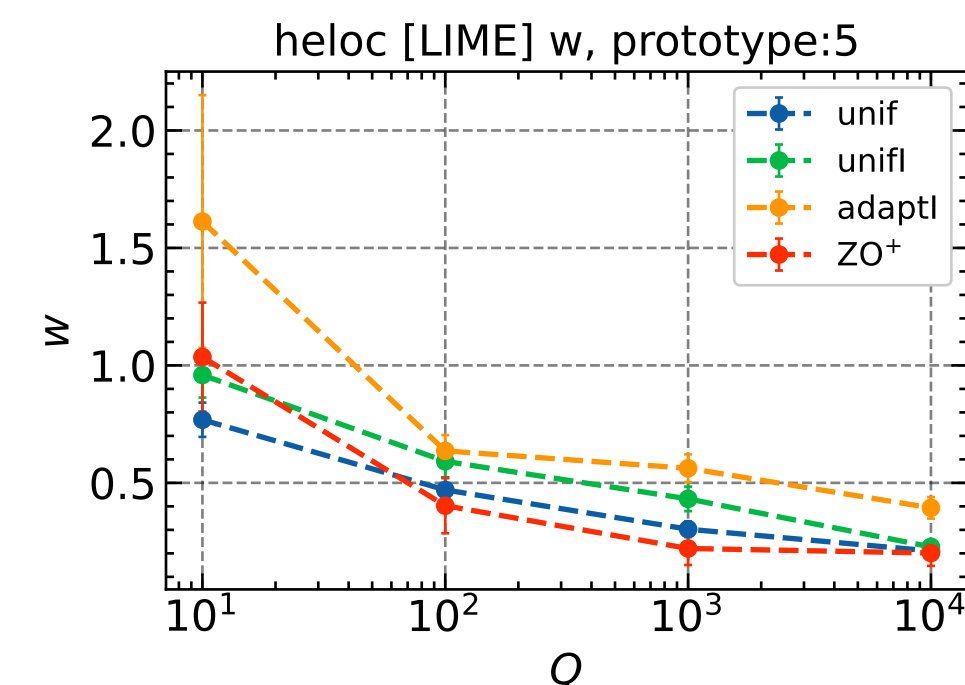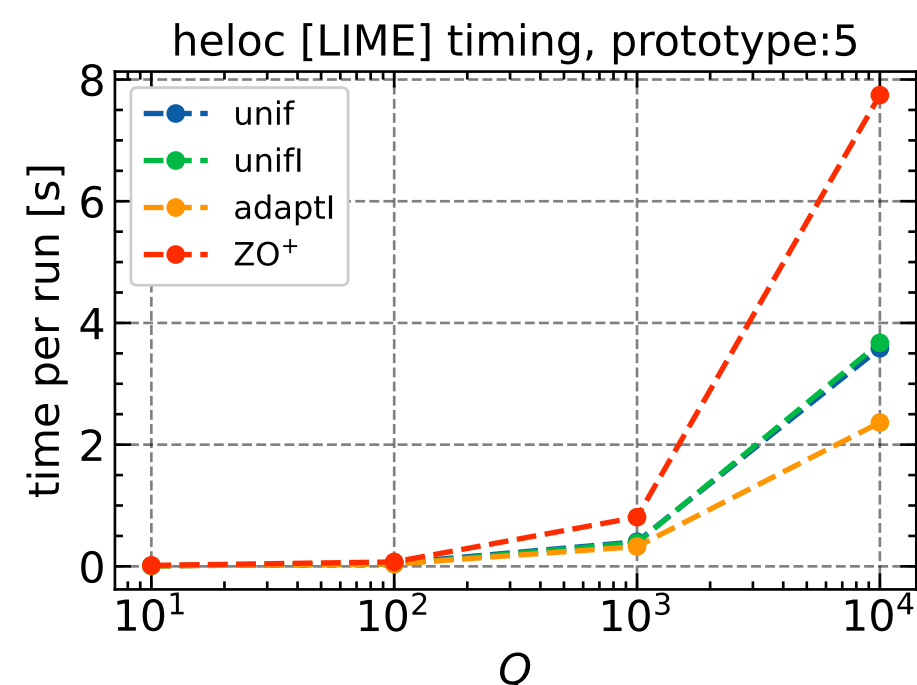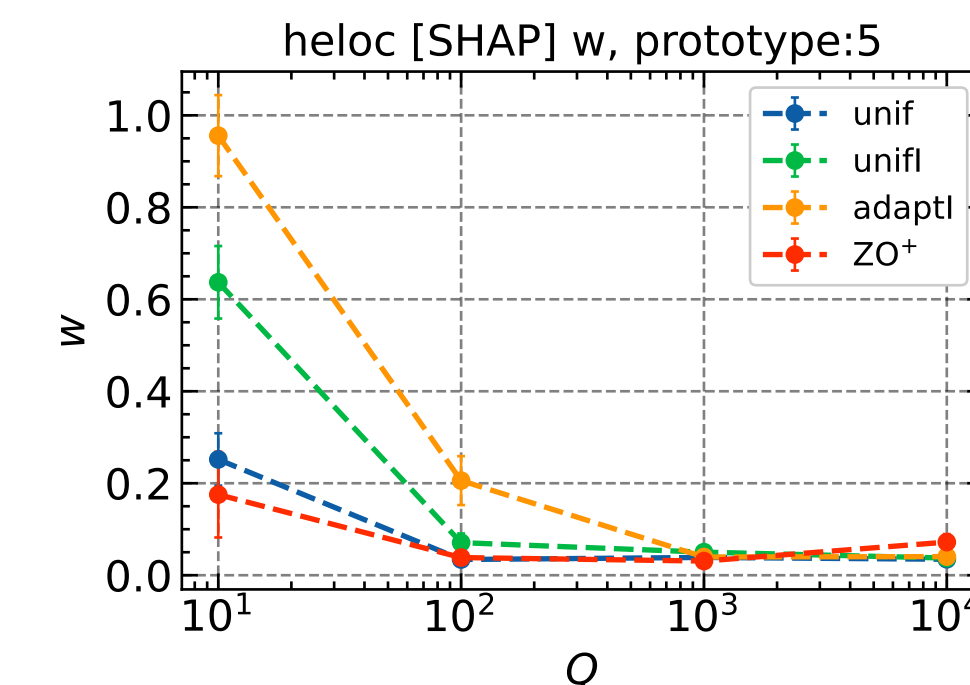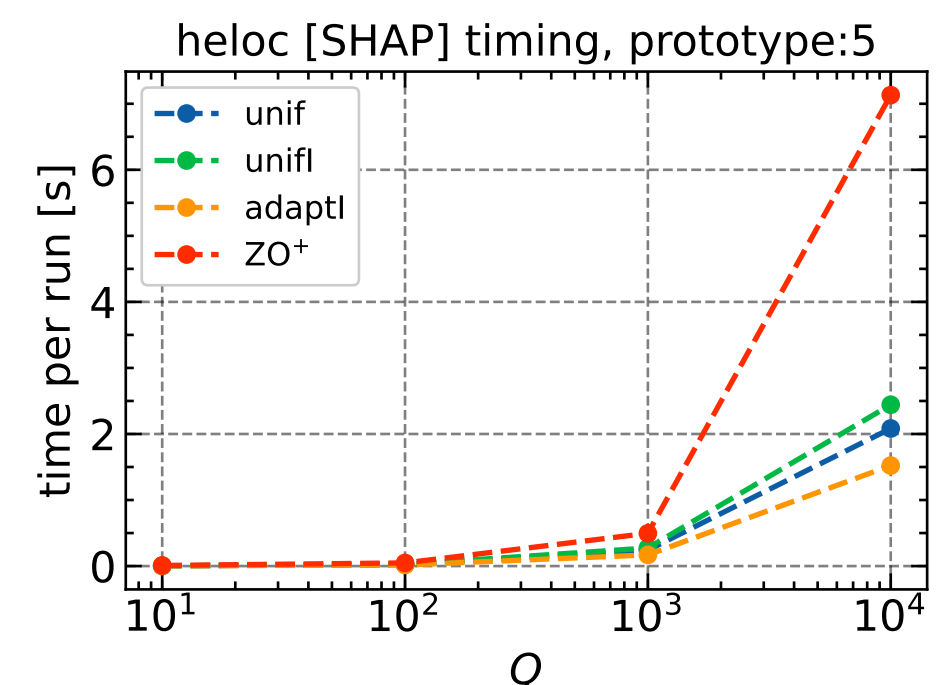

Supplement: supplementary_material [file attachment]

1834, LIME

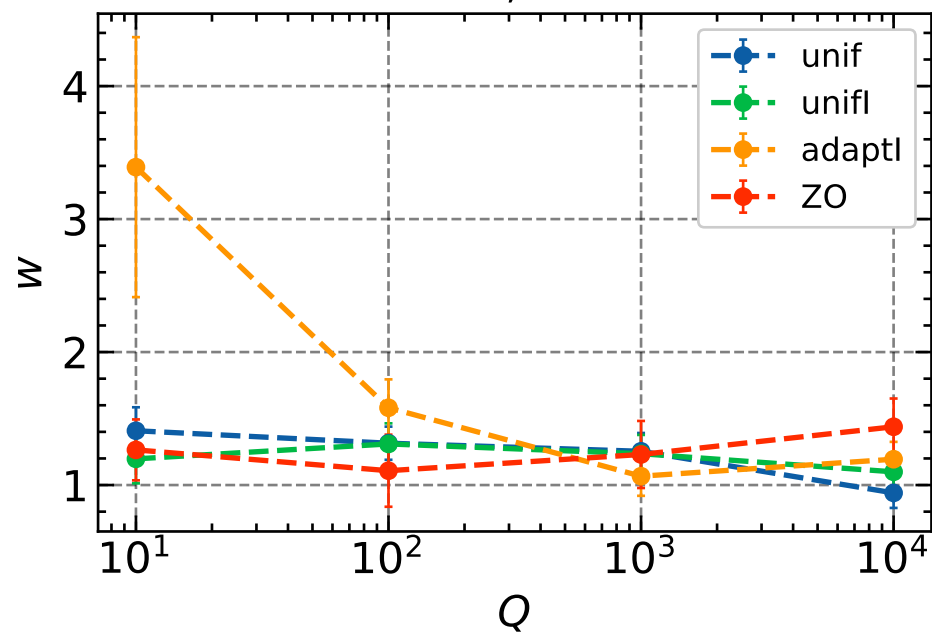

1834, SHAP

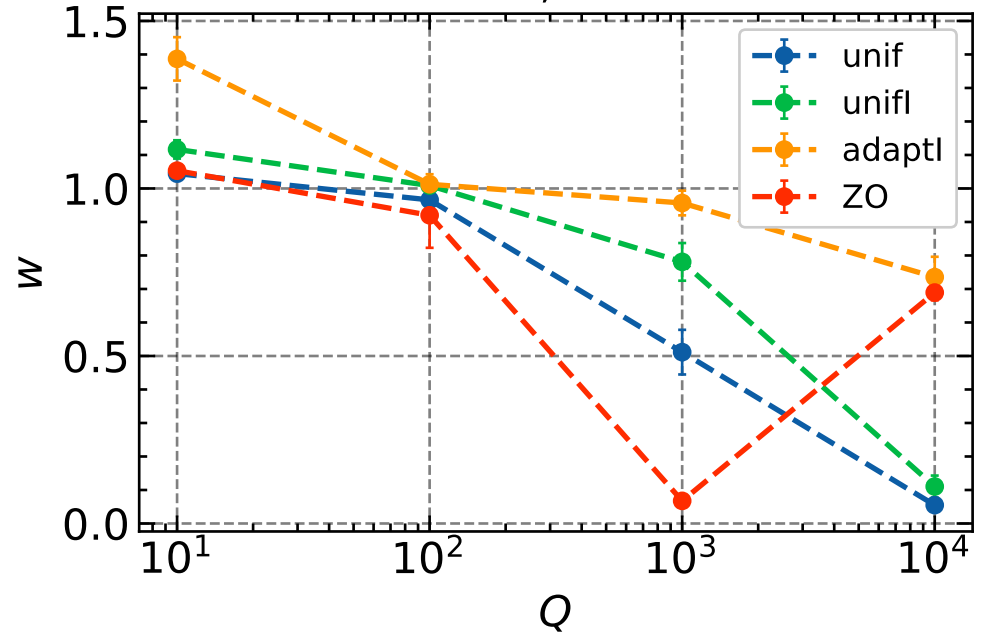

103, LIME

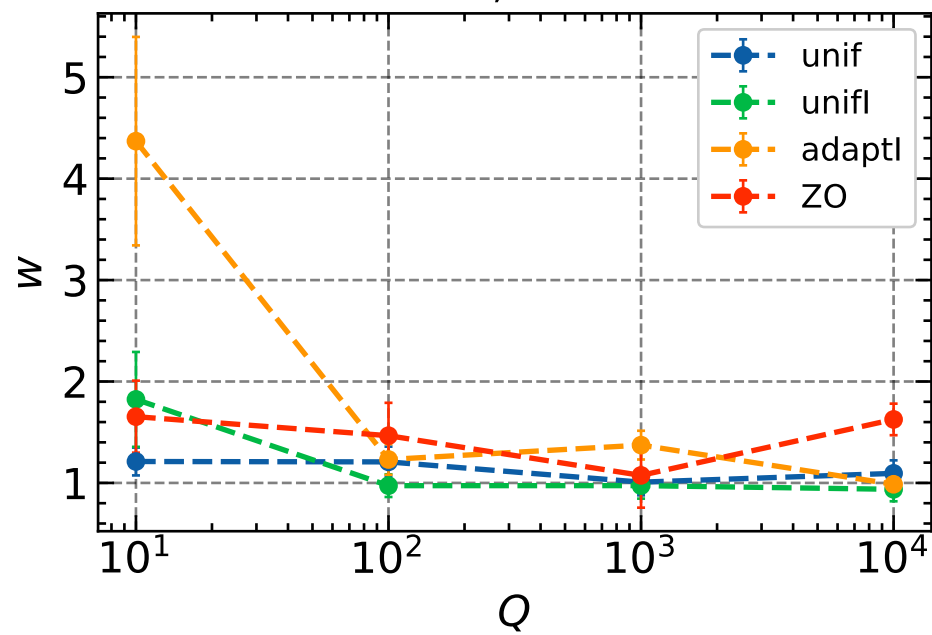

103, SHAP

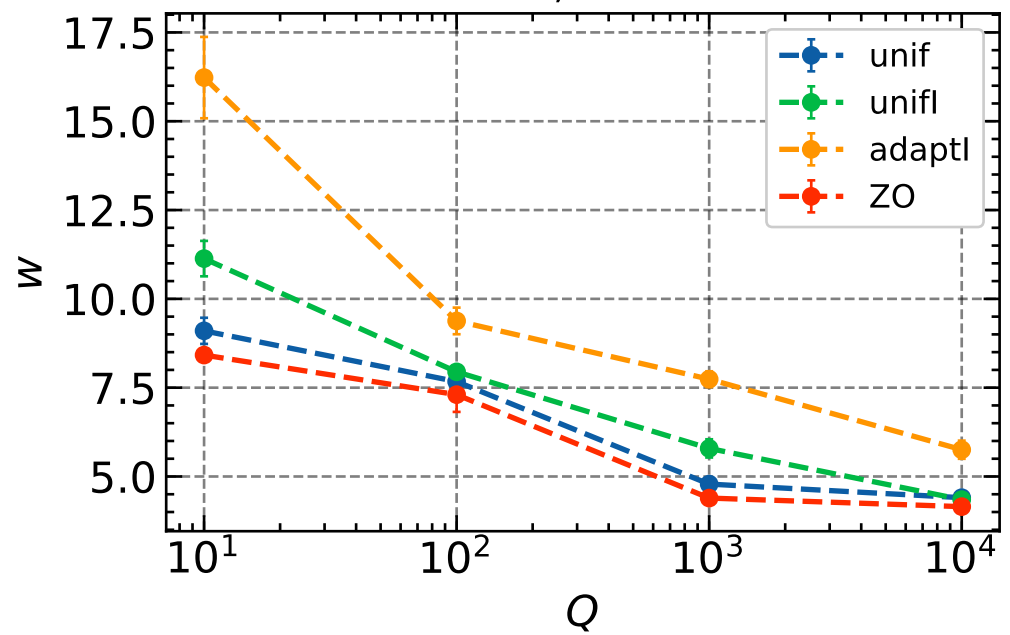

1009, LIME

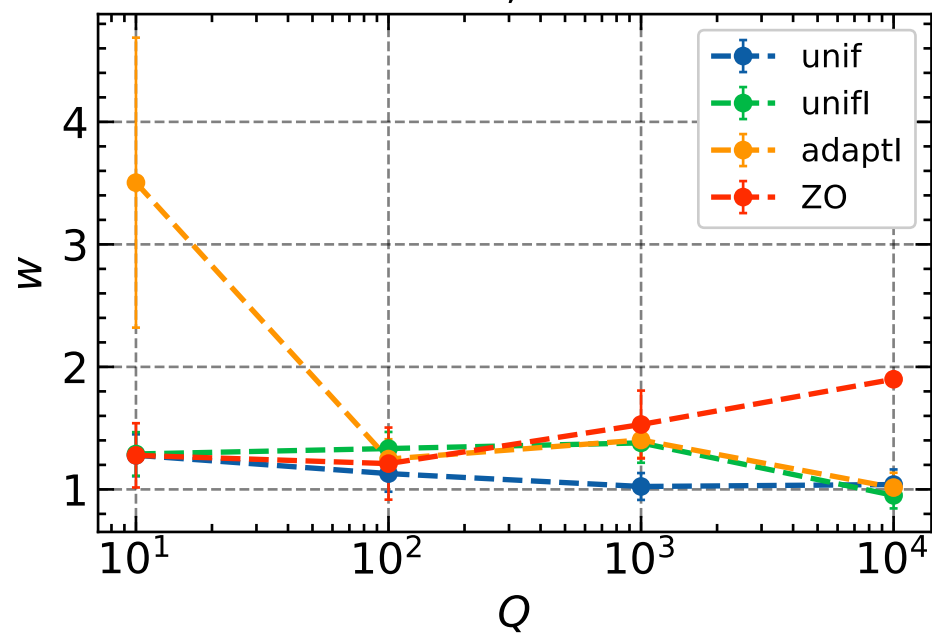

1009, SHAP

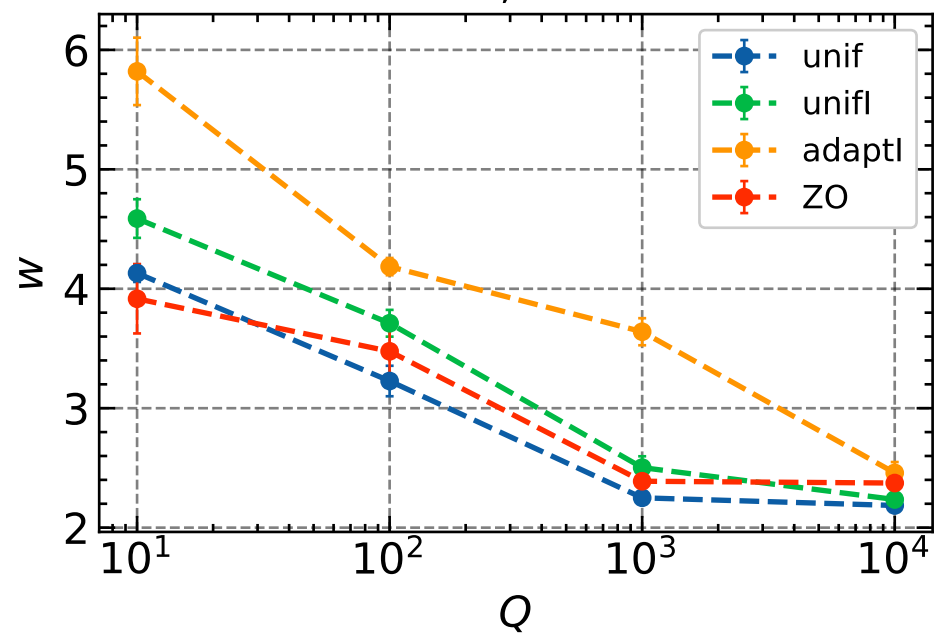

1449, LIME

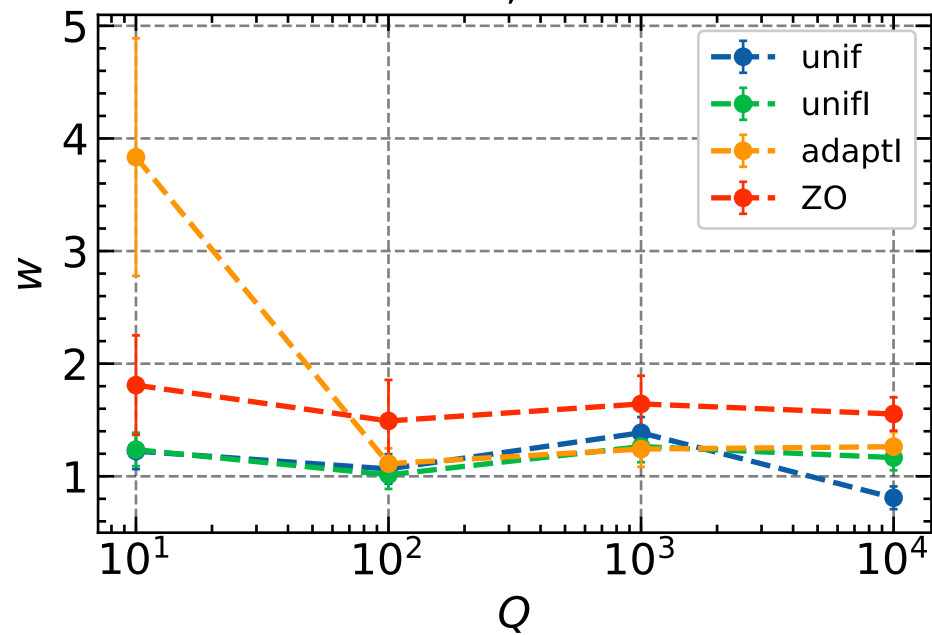

1449, SHAP

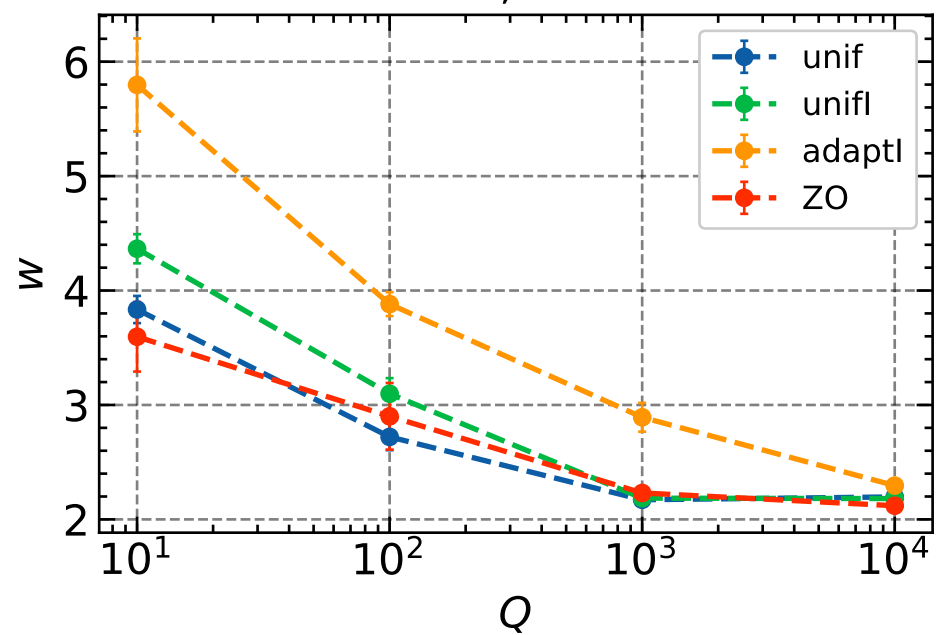

520, LIME

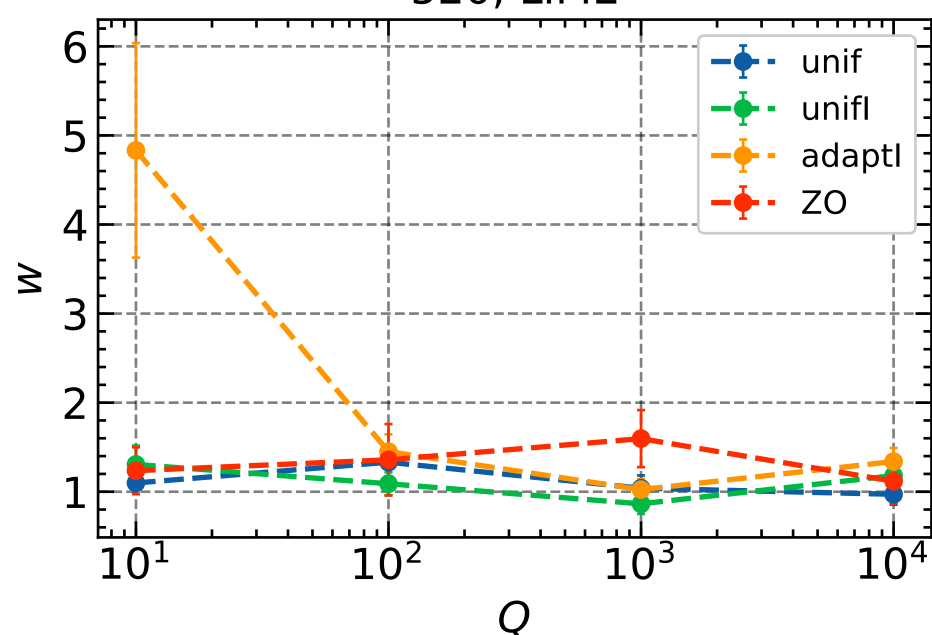

520, SHAP

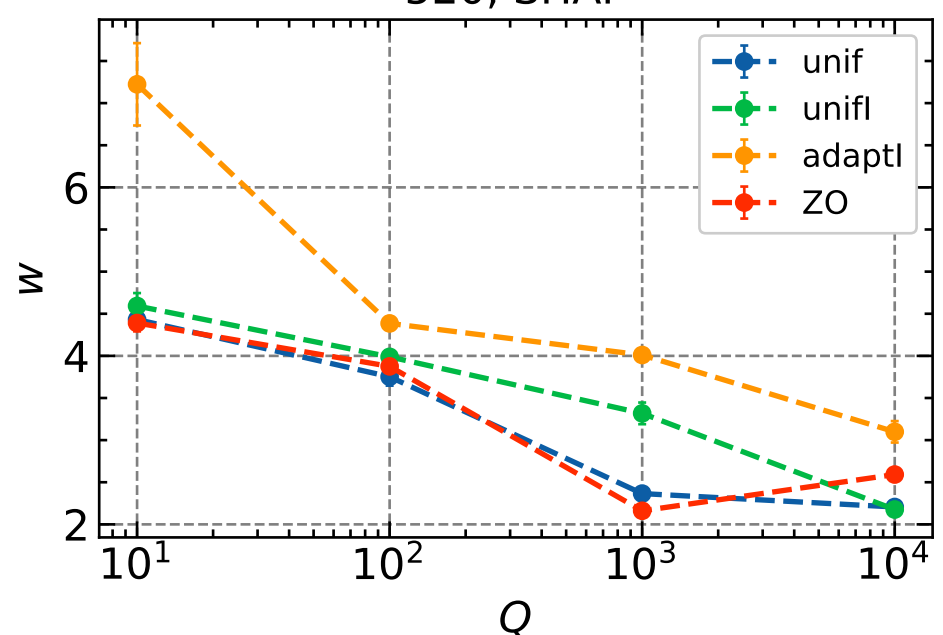

Supplement: supplementary_material [file attachment]

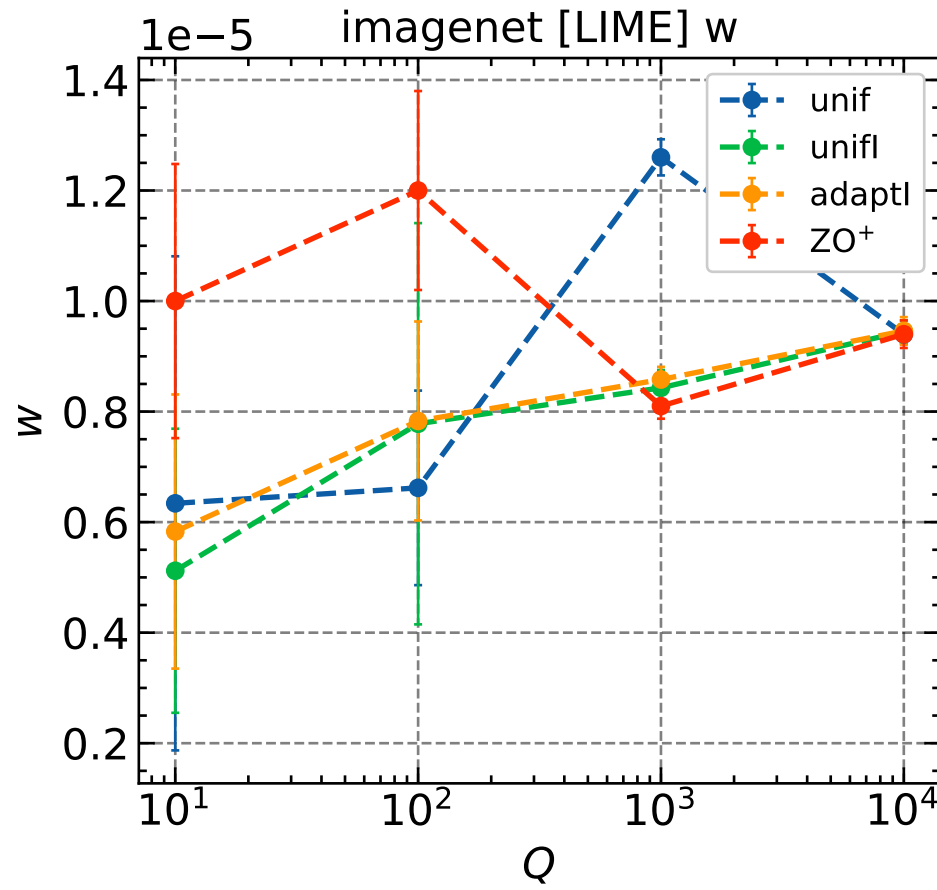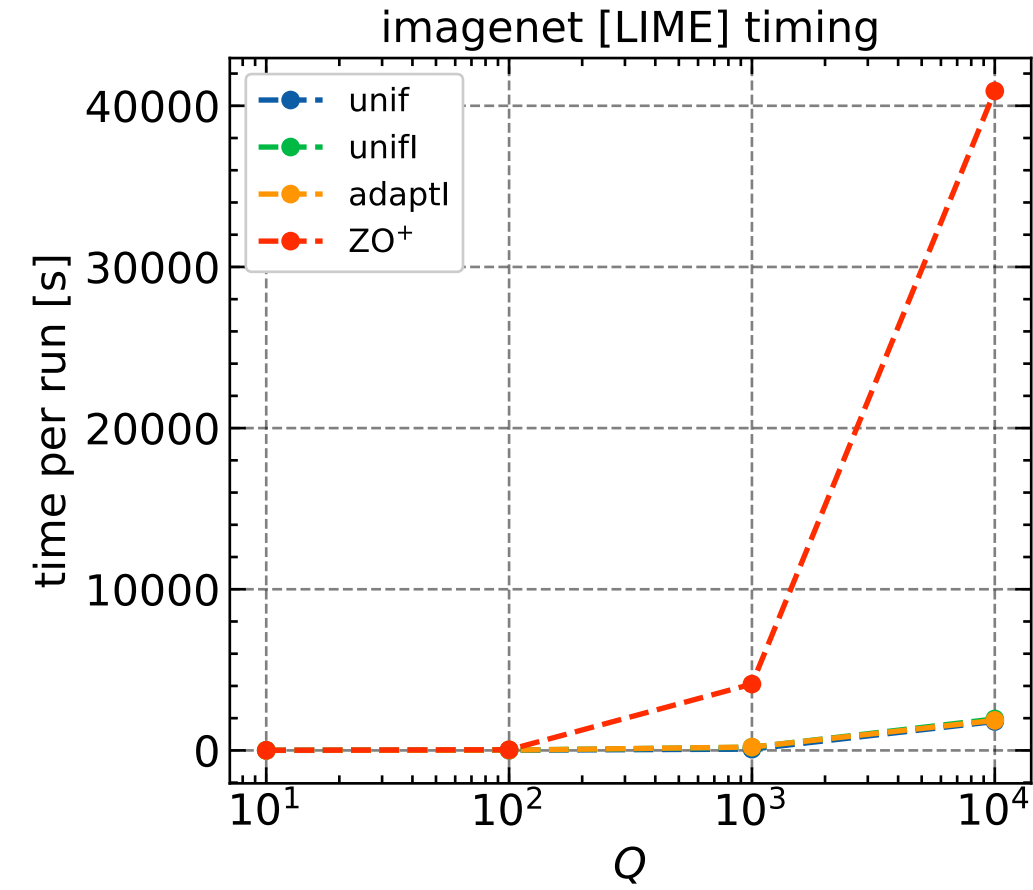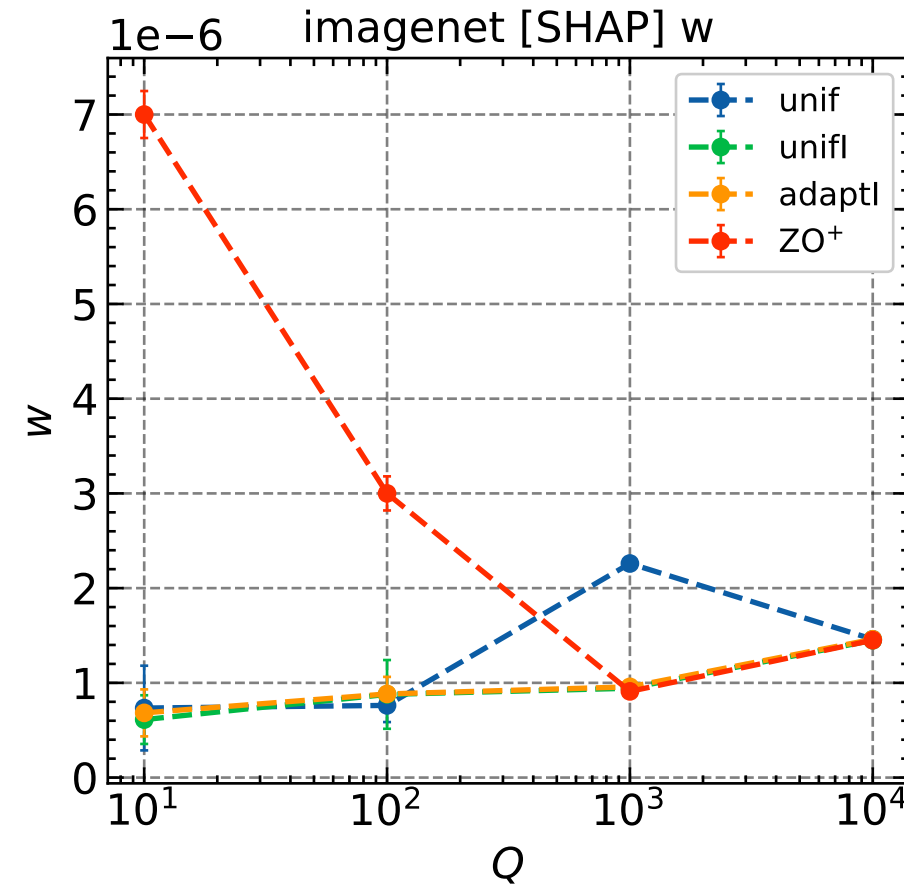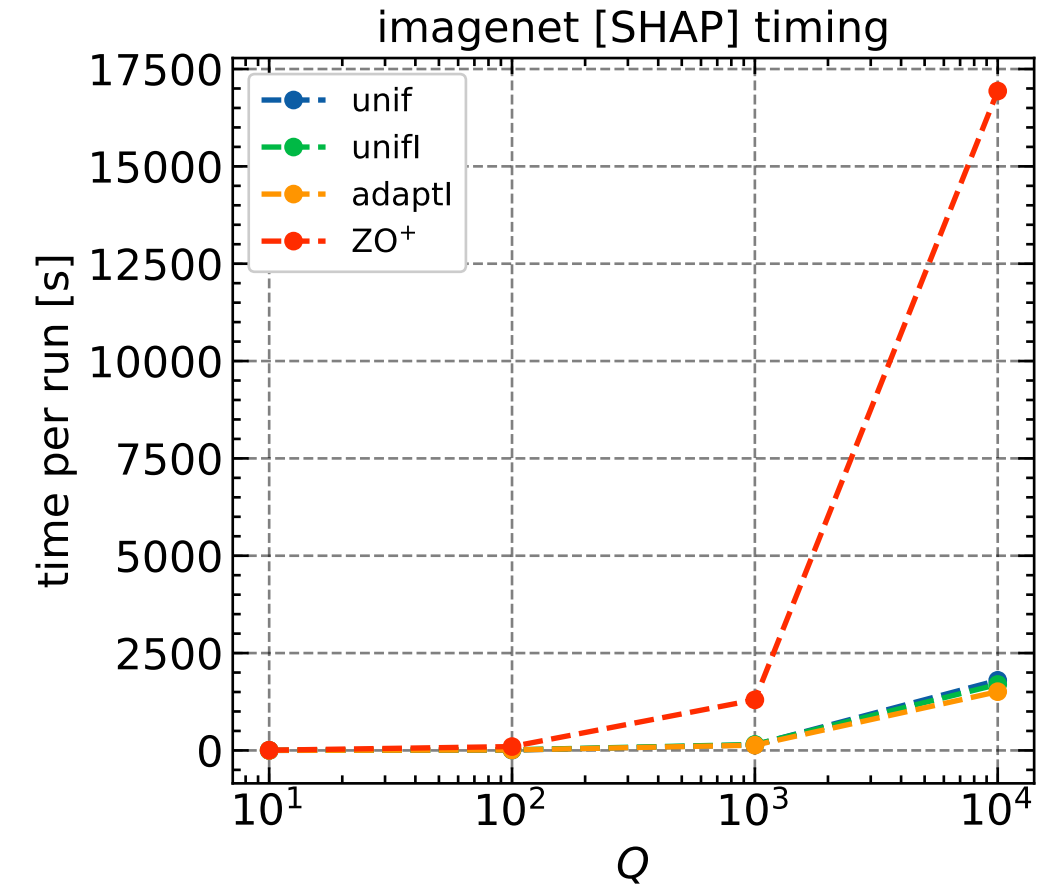

Supplement: supplementary_material [file attachment]
